# Supplementary material for: MicroRNA Profile of Mouse Adipocyte-Derived Extracellular Vesicles
Source: MDPI journal article supplement (doi:10.3390/cells13151298), 2024-08-01
Supplement: s1 [file s1]

## Sheet: TargetScanHuman_8.0
Ortholog of target gene	Representative transcript	Gene name	3P-seq tags + 5	Total sites	8mer sites	7mer-m8 sites	7mer-A1 sites	6mer sites	Predicted occupancy (low miRNA)
SH2D2A	ENST00000368198.3	SH2 domain containing 2A	21	12	9	2	1	0
SLMO1	ENST00000592149.1	slowmo homolog 1 (Drosophila)	123	8	8	0	0	0
CA10	ENST00000570565.1	carbonic anhydrase X	5	12	8	2	2	0
VPS33B	ENST00000333371.3	vacuolar protein sorting 33 homolog B (yeast)	7	10	10	0	0	0
SPATA8	ENST00000328504.3	spermatogenesis associated 8	10	7	7	0	0	0
DTHD1	ENST00000456874.2	death domain containing 1	5	16	13	1	2	1
ONECUT3	ENST00000382349.4	one cut homeobox 3	5	13	7	3	3	1
SNAI2	ENST00000020945.1	snail family zinc finger 2	1233	7	5	1	1	0
LY6G6C	ENST00000495859.1	lymphocyte antigen 6 complex, locus G6C	5	7	4	1	2	0
CD40LG	ENST00000370629.2	CD40 ligand	5	8	8	0	0	0
SNAP25	ENST00000254976.2	synaptosomal-associated protein, 25kDa	54	9	8	0	1	1
UNCX	ENST00000316333.8	UNC homeobox	5	7	7	0	0	0
FAM107A	ENST00000464064.1	family with sequence similarity 107, member A	12	9	9	0	0	1
BMP4	ENST00000245451.4	bone morphogenetic protein 4	24	6	6	0	0	1
GFRA2	ENST00000524240.1	GDNF family receptor alpha 2	13	9	9	0	0	0
AC006946.15	ENST00000441544.1	Uncharacterized protein	5	4	4	0	0	0
C16orf47	ENST00000358463.2	chromosome 16 open reading frame 47	8	7	5	0	2	0
IGLON5	ENST00000270642.8	IgLON family member 5	5	8	6	1	1	0
VSNL1	ENST00000406397.1	visinin-like 1	89	7	5	1	1	1
NCR3	ENST00000376073.4	natural cytotoxicity triggering receptor 3	5	4	4	0	0	0
BARHL2	ENST00000370445.4	BarH-like homeobox 2	13	7	7	0	0	0
OSR1	ENST00000272223.2	odd-skipped related 1 (Drosophila)	15	7	6	0	1	0
VPRBP	ENST00000335891.5	Vpr (HIV-1) binding protein	102	10	10	0	0	0
TTC23	ENST00000394129.2	tetratricopeptide repeat domain 23	109	3	3	0	0	0
AC015987.2	ENST00000416501.1		5	5	5	0	0	0
ACTR3C	ENST00000252071.4	ARP3 actin-related protein 3 homolog C (yeast)	5	2	2	0	0	1
SCNN1D	ENST00000400928.3	sodium channel, non-voltage-gated 1, delta subunit	114	6	5	0	1	0
RAB7A	ENST00000265062.3	RAB7A, member RAS oncogene family	7894	6	2	1	3	1
MLEC	ENST00000228506.3	malectin	12084	8	6	1	1	0
NRXN1	ENST00000342183.5	neurexin 1	5	10	8	1	1	0
ST18	ENST00000276480.7	suppression of tumorigenicity 18 (breast carcinoma) (zinc finger protein)	5	8*	5	0	2	0
TRIOBP	ENST00000406386.3	TRIO and F-actin binding protein	1545	9	7	2	0	0
GJB4	ENST00000339480.1	gap junction protein, beta 4, 30.3kDa	5	8	7	1	0	2
PSMD5	ENST00000210313.3	proteasome (prosome, macropain) 26S subunit, non-ATPase, 5	3846	7	6	0	1	0
HPCA	ENST00000373467.3	hippocalcin	5	6	5	0	1	0
HOXC12	ENST00000243103.3	homeobox C12	5	7	7	0	0	0
DMRTA1	ENST00000325870.2	DMRT-like family A1	124	7	6	0	1	0
PIK3R5	ENST00000447110.1	phosphoinositide-3-kinase, regulatory subunit 5	5	9	8	0	1	0
RP11-247C2.2	ENST00000563727.1	HCG2004779; Uncharacterized protein	5	7	5	1	1	1
TCTE1	ENST00000371505.4	t-complex-associated-testis-expressed 1	34	7	6	0	1	0
CORO6	ENST00000388767.3	coronin 6	48	7	6	0	1	0
LMOD3	ENST00000420581.2	leiomodin 3 (fetal)	5	9	6	0	3	0
SNX12	ENST00000374274.3	sorting nexin 12	849	8	8	0	0	0
GRID1	ENST00000327946.7	glutamate receptor, ionotropic, delta 1	45	4	4	0	0	0
ASAH2	ENST00000395526.4	N-acylsphingosine amidohydrolase (non-lysosomal ceramidase) 2	5	4	3	0	1	0
HAS2	ENST00000303924.4	hyaluronan synthase 2	398	6	5	1	0	1
BCL2	ENST00000398117.1	B-cell CLL/lymphoma 2	55	8	6	1	1	1
EHD3	ENST00000322054.5	EH-domain containing 3	206	7	5	1	1	0
KIAA1549	ENST00000440172.1	KIAA1549	508	8*	6	0	1	2
DLX6	ENST00000518156.2	distal-less homeobox 6	76	5	5	0	0	0
OTP	ENST00000306422.3	orthopedia homeobox	9	7	6	1	0	1
TNNI1	ENST00000361379.4	troponin I type 1 (skeletal, slow)	5	9	4	3	2	0
DNAH10OS	ENST00000514254.2	dynein, axonemal, heavy chain 10 opposite strand	89	7	5	1	1	1
ZNF618	ENST00000288466.7	zinc finger protein 618	778	11	7	0	4	1
DCTD	ENST00000357067.3	dCMP deaminase	747	4	4	0	0	1
LHX6	ENST00000373755.2	LIM homeobox 6	196	6	6	0	0	0
KLF12	ENST00000377669.2	Kruppel-like factor 12	251	7	5	0	2	2
NMNAT2	ENST00000294868.4	nicotinamide nucleotide adenylyltransferase 2	18	9	5	2	2	1
GRASP	ENST00000552049.1	GRP1 (general receptor for phosphoinositides 1)-associated scaffold protein	51	5	4	0	1	0
ST6GAL2	ENST00000361686.4	ST6 beta-galactosamide alpha-2,6-sialyltranferase 2	5	6	5	0	1	1
ACKR4	ENST00000249887.2	atypical chemokine receptor 4	5	4	4	0	0	0
MAN1C1	ENST00000374332.4	mannosidase, alpha, class 1C, member 1	60	7	6	1	0	0
ASCL4	ENST00000342331.4	achaete-scute complex homolog 4 (Drosophila)	5	4	4	0	0	0
KLF7	ENST00000423015.1	Kruppel-like factor 7 (ubiquitous)	737	11	8	2	1	0
FERMT1	ENST00000217289.4	fermitin family member 1	245	8	7	1	0	1
ASAH2B	ENST00000374007.1	N-acylsphingosine amidohydrolase (non-lysosomal ceramidase) 2B	5	4	3	0	1	0
TMEM151B	ENST00000451188.2	transmembrane protein 151B	5	10	9	1	0	1
SEMA6A	ENST00000343348.6	sema domain, transmembrane domain (TM), and cytoplasmic domain, (semaphorin) 6A	106	6	5	1	0	0
ANK2	ENST00000357077.4	ankyrin 2, neuronal	133	6	5	0	1	0
ANGPT2	ENST00000325203.5	angiopoietin 2	5	7	4	1	2	0
RSPO1	ENST00000373059.1	R-spondin 1	5	4	4	0	0	0
NAB2	ENST00000357680.4	NGFI-A binding protein 2 (EGR1 binding protein 2)	4262	5	5	0	0	0
MAPK11	ENST00000330651.6	mitogen-activated protein kinase 11	9	5	5	0	0	0
MAFB	ENST00000373313.2	v-maf avian musculoaponeurotic fibrosarcoma oncogene homolog B	333	8	7	1	0	0
SMARCA2	ENST00000349721.2	SWI/SNF related, matrix associated, actin dependent regulator of chromatin, subfamily a, member 2	158	5	4	0	1	1
ZNRF3	ENST00000544604.2	zinc and ring finger 3	179	6	6	0	0	0
GTF2H2	ENST00000274400.5	general transcription factor IIH, polypeptide 2, 44kDa	5	3	3	0	0	0
THRA	ENST00000450525.2	thyroid hormone receptor, alpha	547	9	7	0	2	0
MAPK10	ENST00000395169.3	mitogen-activated protein kinase 10	5	8	3	3	2	1
GTF2H2C	ENST00000510979.1	general transcription factor IIH, polypeptide 2C	5	3	3	0	0	0
SNTB1	ENST00000395601.3	syntrophin, beta 1 (dystrophin-associated protein A1, 59kDa, basic component 1)	217	9	6	1	2	1
SLC44A1	ENST00000374720.3	solute carrier family 44 (choline transporter), member 1	407	8	7	0	1	2
MAGEE2	ENST00000373359.2	melanoma antigen family E, 2	5	5	5	0	0	0
CYP4A11	ENST00000310638.4	cytochrome P450, family 4, subfamily A, polypeptide 11	5	4	4	0	0	0
KIAA0087	ENST00000242109.3	KIAA0087	5	5	5	0	0	0
RP11-366L20.2	ENST00000356215.2	Uncharacterized protein	5	5	4	1	0	2
STK10	ENST00000176763.5	serine/threonine kinase 10	655	7	5	1	1	0
TTC12	ENST00000529221.1	tetratricopeptide repeat domain 12	362	3	3	0	0	0
GABRB3	ENST00000311550.5	gamma-aminobutyric acid (GABA) A receptor, beta 3	267	6	4	1	1	1
E2F8	ENST00000527884.1	E2F transcription factor 8	66	5	4	0	1	0
TP53I11	ENST00000395648.3	tumor protein p53 inducible protein 11	90	6	5	1	0	2
BNC2	ENST00000380672.4	basonuclin 2	770	12	7	3	2	0
LEPREL1	ENST00000319332.5	leprecan-like 1	875	6	6	0	0	0
PRKCG	ENST00000263431.3	protein kinase C, gamma	5	5	5	0	0	0
TMEM52B	ENST00000298530.3	transmembrane protein 52B	11	5	3	1	1	0
GLP1R	ENST00000373256.4	glucagon-like peptide 1 receptor	5	6	5	1	0	0
COL6A6	ENST00000358511.6	collagen, type VI, alpha 6	5	7	6	1	0	0
CDH12	ENST00000504376.2	cadherin 12, type 2 (N-cadherin 2)	21	5	3	1	1	1
CLEC2L	ENST00000422142.2	C-type lectin domain family 2, member L	194	6*	1	1	3	2
SETD8	ENST00000402868.3	SET domain containing (lysine methyltransferase) 8	52	5	3	1	1	1
FAM83C	ENST00000374408.3	family with sequence similarity 83, member C	5	5	4	0	1	0
SFRP1	ENST00000220772.3	secreted frizzled-related protein 1	148	7	5	2	0	0
NR4A2	ENST00000409108.2	nuclear receptor subfamily 4, group A, member 2	1631	5	5	0	0	0
MFSD6	ENST00000392328.1	major facilitator superfamily domain containing 6	47	6	5	1	0	1
IARS	ENST00000375629.3	isoleucyl-tRNA synthetase	65	4	2	2	0	0
LINC00632	ENST00000370535.3	long intergenic non-protein coding RNA 632	5	4	1	0	3	0
RORB	ENST00000376896.3	RAR-related orphan receptor B	5	10	7	2	1	2
NAPB	ENST00000377026.4	N-ethylmaleimide-sensitive factor attachment protein, beta	82	5	4	1	0	1
CHST2	ENST00000309575.3	carbohydrate (N-acetylglucosamine-6-O) sulfotransferase 2	154	8	5	2	1	0
GNA13	ENST00000439174.2	guanine nucleotide binding protein (G protein), alpha 13	190	10	10	0	0	1
PRDM8	ENST00000504452.1	PR domain containing 8	634	5	4	1	0	0
SLC7A8	ENST00000469263.1	solute carrier family 7 (amino acid transporter light chain, L system), member 8	15	6	5	1	0	0
FBRS	ENST00000356166.6	fibrosin	1334	6	5	1	0	0
NCAM1	ENST00000316851.7	neural cell adhesion molecule 1	19	5	5	0	0	1
SOWAHB	ENST00000334306.2	sosondowah ankyrin repeat domain family member B	25	5	5	0	0	0
KCNIP3	ENST00000295225.5	Kv channel interacting protein 3, calsenilin	555	4	4	0	0	0
KCNJ16	ENST00000589377.1	potassium inwardly-rectifying channel, subfamily J, member 16	5	6	6	0	0	0
TBX15	ENST00000207157.3	T-box 15	14	6	4	2	0	1
MAF	ENST00000393350.1	v-maf avian musculoaponeurotic fibrosarcoma oncogene homolog	608	6	6	0	0	2
RAB9A	ENST00000464506.1	RAB9A, member RAS oncogene family	742	2	2	0	0	0
SLITRK3	ENST00000475390.1	SLIT and NTRK-like family, member 3	5	8	6	1	1	2
VAPB	ENST00000395802.3	VAMP (vesicle-associated membrane protein)-associated protein B and C	391	4	4	0	0	1
HIST2H4B	ENST00000392932.4	histone cluster 2, H4b	5	3	3	0	0	0
BCAS1	ENST00000371440.3	breast carcinoma amplified sequence 1	0	10	9	1	0	0
NGFR	ENST00000172229.3	nerve growth factor receptor	5	4	4	0	0	1
CDH20	ENST00000262717.4	cadherin 20, type 2	5	6	5	1	0	0
ITGAM	ENST00000544665.3	integrin, alpha M (complement component 3 receptor 3 subunit)	10	4	3	1	0	0
AJAP1	ENST00000378191.4	adherens junctions associated protein 1	5	7	3	1	3	1
CD4	ENST00000011653.4	CD4 molecule	5	5	3	1	1	0
CLVS1	ENST00000518592.1	clavesin 1	5	5	2	3	0	0
CEND1	ENST00000330106.4	cell cycle exit and neuronal differentiation 1	28	4	1	1	2	0
MGRN1	ENST00000415496.1	mahogunin ring finger 1, E3 ubiquitin protein ligase	2337	10	6	4	0	3
PLD5	ENST00000536534.2	phospholipase D family, member 5	5	7	3	3	1	0
RFX3	ENST00000382004.3	regulatory factor X, 3 (influences HLA class II expression)	37	9	6	0	3	2
ALOX15B	ENST00000380183.4	arachidonate 15-lipoxygenase, type B	5	3	2	1	0	0
BEAN1	ENST00000299694.8	brain expressed, associated with NEDD4, 1	16	4	2	0	2	1
CACNA2D2	ENST00000423994.2	calcium channel, voltage-dependent, alpha 2/delta subunit 2	19	8	6	1	1	0
RHOJ	ENST00000316754.3	ras homolog family member J	118	4	3	1	0	0
TNR	ENST00000367674.2	tenascin R	5	15	12	2	1	1
LRRC32	ENST00000260061.5	leucine rich repeat containing 32	10	6	5	1	0	0
FBXW5	ENST00000325285.3	F-box and WD repeat domain containing 5	37	3	3	0	0	0
WSCD1	ENST00000574946.1	WSC domain containing 1	403	5	4	1	0	1
SEMA5B	ENST00000195173.4	sema domain, seven thrombospondin repeats (type 1 and type 1-like), transmembrane domain (TM) and short cytoplasmic domain, (semaphorin) 5B	15	5	5	0	0	1
SLC6A6	ENST00000454876.2	solute carrier family 6 (neurotransmitter transporter), member 6	280	6	5	0	1	0
PARD3B	ENST00000406610.2	par-3 family cell polarity regulator beta	38	6	6	0	0	1
SNAP23	ENST00000249647.3	synaptosomal-associated protein, 23kDa	99	3	2	0	1	0
SYT15	ENST00000374323.4	synaptotagmin XV	5	6	4	1	1	1
ATP2B3	ENST00000370186.1	ATPase, Ca++ transporting, plasma membrane 3	5	8	6	2	0	0
RHOU	ENST00000366691.3	ras homolog family member U	3519	6	5	1	0	1
ELFN1	ENST00000424383.2	extracellular leucine-rich repeat and fibronectin type III domain containing 1	5	5	4	0	1	0
CAT	ENST00000241052.4	catalase	4078	3	2	1	0	0
FCRL6	ENST00000321935.6	Fc receptor-like 6	5	4	0	1	3	0
SP9	ENST00000394967.2	Sp9 transcription factor	79	4	4	0	0	0
SAMD12	ENST00000409003.4	sterile alpha motif domain containing 12	57	6	3	1	2	1
MAPK6	ENST00000261845.5	mitogen-activated protein kinase 6	24	4	3	1	0	0
ADAMTS14	ENST00000373208.1	ADAM metallopeptidase with thrombospondin type 1 motif, 14	5	7	5	1	1	0
NAB1	ENST00000337386.5	NGFI-A binding protein 1 (EGR1 binding protein 1)	279	6	6	0	0	0
AP1AR	ENST00000274000.5	adaptor-related protein complex 1 associated regulatory protein	89	3	3	0	0	0
PALM2	ENST00000448454.2	paralemmin 2	35	9	6	2	1	1
NCAM2	ENST00000400546.1	neural cell adhesion molecule 2	64	8	6	0	2	3
ECE1	ENST00000415912.2	endothelin converting enzyme 1	1166	8	7	1	0	0
RP11-362K2.2	ENST00000546977.1	Protein LOC100506869	5	2	1	1	0	0
RSC1A1	ENST00000345034.1	regulatory solute carrier protein, family 1, member 1	352	2	2	0	0	0
TACR2	ENST00000373307.1	tachykinin receptor 2	5	3	3	0	0	1
GCM2	ENST00000379491.4	glial cells missing homolog 2 (Drosophila)	5	3	2	1	0	0
HS6ST3	ENST00000376705.2	heparan sulfate 6-O-sulfotransferase 3	598	11	9	1	1	0
CREB3L1	ENST00000529193.1	cAMP responsive element binding protein 3-like 1	160	3	1	1	1	0
KLF6	ENST00000542957.1	Kruppel-like factor 6	4644	8	4	2	2	0
CD2AP	ENST00000359314.5	CD2-associated protein	145	5	5	0	0	0
DGKG	ENST00000265022.3	diacylglycerol kinase, gamma 90kDa	5	5	5	0	0	0
RP11-295D22.1	ENST00000565320.1	Uncharacterized protein	5	2	2	0	0	0
RIT2	ENST00000589109.1	Ras-like without CAAX 2	5	2	2	0	0	0
CCDC3	ENST00000378825.3	coiled-coil domain containing 3	16	5	3	2	0	0
LYZ	ENST00000261267.2	lysozyme	255	2	2	0	0	0
LRTM2	ENST00000543818.1	leucine-rich repeats and transmembrane domains 2	5	4	4	0	0	1
DEC1	ENST00000374016.1	deleted in esophageal cancer 1	5	2	1	1	0	0
RAD18	ENST00000264926.2	RAD18 homolog (S. cerevisiae)	211	4	2	1	1	1
PIRT	ENST00000580256.2	phosphoinositide-interacting regulator of transient receptor potential channels	5	4	3	0	1	0
TPTE	ENST00000298232.7	transmembrane phosphatase with tensin homology	5	3	3	0	0	0
NKX2-8	ENST00000258829.5	NK2 homeobox 8	75	2	2	0	0	0
UNC13B	ENST00000378495.3	unc-13 homolog B (C. elegans)	1019	6	4	0	2	1
SH3BGRL2	ENST00000369838.4	SH3 domain binding glutamic acid-rich protein like 2	32	4	3	0	1	1
NRIP3	ENST00000309166.3	nuclear receptor interacting protein 3	58	5	1	3	1	0
TRPC5	ENST00000262839.2	transient receptor potential cation channel, subfamily C, member 5	5	6	6	0	0	0
TEAD1	ENST00000361905.4	TEA domain family member 1 (SV40 transcriptional enhancer factor)	740	8	4	4	0	2
SIM1	ENST00000369208.3	single-minded homolog 1 (Drosophila)	104	9	7	1	1	1
SLC1A2	ENST00000278379.3	solute carrier family 1 (glial high affinity glutamate transporter), member 2	5	8	4	1	3	1
FOXA1	ENST00000250448.2	forkhead box A1	249	3	3	0	0	0
TMEM141	ENST00000290079.8	transmembrane protein 141	11443	2	1	0	1	0
LHX9	ENST00000367390.3	LIM homeobox 9	40	6	4	1	1	1
DISC1	ENST00000439617.2	disrupted in schizophrenia 1	132	5	3	0	2	0
LNX2	ENST00000316334.3	ligand of numb-protein X 2	760	4	3	0	1	0
SSBP4	ENST00000348495.6	single stranded DNA binding protein 4	510	2	1	0	1	0
PPP1R16B	ENST00000299824.1	protein phosphatase 1, regulatory subunit 16B	16	7	6	1	0	2
SLC8A3	ENST00000356921.2	solute carrier family 8 (sodium/calcium exchanger), member 3	5	5	5	0	0	1
KCNJ15	ENST00000328656.4	potassium inwardly-rectifying channel, subfamily J, member 15	5	6	6	0	0	2
STAT6	ENST00000300134.3	signal transducer and activator of transcription 6, interleukin-4 induced	275	4	1	2	1	0
IGF2	ENST00000381395.1	insulin-like growth factor 2 (somatomedin A)	1371	5	4	0	1	0
VTI1A	ENST00000393077.2	vesicle transport through interaction with t-SNAREs 1A	376	4	3	1	0	3
GABRG3	ENST00000333743.6	gamma-aminobutyric acid (GABA) A receptor, gamma 3	5	2	2	0	0	0
PLP1	ENST00000303958.2	proteolipid protein 1	5	3	3	0	0	0
PCGF3	ENST00000362003.5	polycomb group ring finger 3	503	7	6	1	0	2
ZNF449	ENST00000339249.4	zinc finger protein 449	345	4	3	1	0	1
CTSE	ENST00000358184.2	cathepsin E	42	4*	2	1	0	0
EOGT	ENST00000383701.3	EGF domain-specific O-linked N-acetylglucosamine (GlcNAc) transferase	302	6	5	1	0	0
PCDHGA5	ENST00000518069.1	protocadherin gamma subfamily A, 5	145	3	3	0	0	0
C22orf29	ENST00000407472.1	chromosome 22 open reading frame 29	351	4	3	1	0	1
HNRNPA0	ENST00000314940.4	heterogeneous nuclear ribonucleoprotein A0	22668	2	2	0	0	0
OPCML	ENST00000331898.7	opioid binding protein/cell adhesion molecule-like	5	5	4	0	1	1
PDZRN3	ENST00000263666.4	PDZ domain containing ring finger 3	146	3	3	0	0	0
ANO3	ENST00000256737.3	anoctamin 3	5	4	2	1	1	0
ELOVL6	ENST00000394607.3	ELOVL fatty acid elongase 6	901	3	2	0	1	4
ACSS1	ENST00000323482.4	acyl-CoA synthetase short-chain family member 1	12	5	3	1	1	0
ONECUT2	ENST00000491143.2	one cut homeobox 2	847	11	5	2	4	3
PSD2	ENST00000274710.3	pleckstrin and Sec7 domain containing 2	5	4	3	0	1	0
GPR123	ENST00000607359.1	G protein-coupled receptor 123	5	5	3	1	1	1
ACCS	ENST00000263776.8	1-aminocyclopropane-1-carboxylate synthase homolog (Arabidopsis)(non-functional)	5	2	2	0	0	0
OLIG2	ENST00000382357.3	oligodendrocyte lineage transcription factor 2	15	4	2	1	1	0
CDH7	ENST00000397968.2	cadherin 7, type 2	42	6	5	0	1	0
TMEM104	ENST00000335464.5	transmembrane protein 104	657	7	3	3	1	0
SERINC3	ENST00000342374.4	serine incorporator 3	1218	2	2	0	0	0
TMEM236	ENST00000480516.1		5	3	1	0	2	0
TMEM236	ENST00000377495.1	transmembrane protein 236	5	3	1	0	2	0
GABBR1	ENST00000376977.3	gamma-aminobutyric acid (GABA) B receptor, 1	213	5	5	0	0	0
SMIM21	ENST00000579022.1	small integral membrane protein 21	5	2	1	0	1	1
SH3BP5	ENST00000383791.3	SH3-domain binding protein 5 (BTK-associated)	4289	4	2	2	0	1
FAM155A	ENST00000375915.2	family with sequence similarity 155, member A	118	4	3	0	1	0
MAPKBP1	ENST00000457542.2	mitogen-activated protein kinase binding protein 1	36	9	9	0	0	0
HOXA6	ENST00000222728.3	homeobox A6	5	3	0	1	2	0
SHROOM3	ENST00000296043.6	shroom family member 3	2841	6	5	1	0	1
GPR45	ENST00000258456.1	G protein-coupled receptor 45	5	2	2	0	0	0
PACSIN2	ENST00000263246.3	protein kinase C and casein kinase substrate in neurons 2	402	4	4	0	0	0
UBE2E3	ENST00000410062.4	ubiquitin-conjugating enzyme E2E 3	15	5	4	0	1	0
H2AFY2	ENST00000373255.4	H2A histone family, member Y2	46	2	2	0	0	0
GNG2	ENST00000556752.1	guanine nucleotide binding protein (G protein), gamma 2	199	2	2	0	0	0
GABRB2	ENST00000393959.1	gamma-aminobutyric acid (GABA) A receptor, beta 2	5	6	4	1	1	0
KIAA1161	ENST00000297625.7	KIAA1161	18	5	3	1	1	2
SOX12	ENST00000342665.2	SRY (sex determining region Y)-box 12	6341	3	3	0	0	1
L1CAM	ENST00000370060.1	L1 cell adhesion molecule	439	5	4	1	0	0
MARCH1	ENST00000274056.7	membrane-associated ring finger (C3HC4) 1, E3 ubiquitin protein ligase	5	3	3	0	0	1
MFAP3L	ENST00000393704.3	microfibrillar-associated protein 3-like	69	5	4	0	1	1
SLC24A2	ENST00000341998.2	solute carrier family 24 (sodium/potassium/calcium exchanger), member 2	5	5	1	1	3	0
NRBP2	ENST00000442628.2	nuclear receptor binding protein 2	1011	4	3	0	1	0
FBLIM1	ENST00000375771.1	filamin binding LIM protein 1	581	3	3	0	0	0
UBFD1	ENST00000395878.3	ubiquitin family domain containing 1	6826	2	2	0	0	0
TLX1	ENST00000467928.2	T-cell leukemia homeobox 1	47	3	2	0	1	1
DOK7	ENST00000507039.1	docking protein 7	19	3	2	1	0	1
ITGA2	ENST00000296585.5	integrin, alpha 2 (CD49B, alpha 2 subunit of VLA-2 receptor)	50	6	5	1	0	0
RNF141	ENST00000265981.2	ring finger protein 141	345	4	3	0	1	0
ACTR1B	ENST00000289228.5	ARP1 actin-related protein 1 homolog B, centractin beta (yeast)	5716	3	2	0	1	0
PRIM2	ENST00000607273.1	primase, DNA, polypeptide 2 (58kDa)	32	2	2	0	0	0
LCOR	ENST00000371103.3	ligand dependent nuclear receptor corepressor	94	5	2	1	2	1
NAT8L	ENST00000331662.3	N-acetyltransferase 8-like (GCN5-related, putative)	220	4	4	0	0	1
C1orf21	ENST00000235307.6	chromosome 1 open reading frame 21	935	4	2	1	1	1
ELOVL5	ENST00000370918.4	ELOVL fatty acid elongase 5	2233	3	2	0	1	0
ELAVL3	ENST00000359227.3	ELAV like neuron-specific RNA binding protein 3	5	6	3	1	2	1
EPHA7	ENST00000369303.4	EPH receptor A7	213	5	5	0	0	0
ZNF569	ENST00000392149.2	zinc finger protein 569	34	3	2	1	0	0
TPPP	ENST00000360578.5	tubulin polymerization promoting protein	7	4	1	0	3	0
FGFRL1	ENST00000264748.6	fibroblast growth factor receptor-like 1	1114	2	1	1	0	0
SRPX2	ENST00000373004.3	sushi-repeat containing protein, X-linked 2	69	7	2	1	4	0
BAK1	ENST00000442998.2	BCL2-antagonist/killer 1	15	6	5	1	0	1
RABL2B	ENST00000354869.3	RAB, member of RAS oncogene family-like 2B	18	3	1	2	0	0
SOX1	ENST00000330949.1	SRY (sex determining region Y)-box 1	5	4	3	1	0	0
SIAH3	ENST00000400405.2	siah E3 ubiquitin protein ligase family member 3	5	5	2	1	2	2
GABBR2	ENST00000259455.2	gamma-aminobutyric acid (GABA) B receptor, 2	214	7	4	3	0	2
WNK1	ENST00000315939.6	WNK lysine deficient protein kinase 1	950	2	2	0	0	0
FAM180A	ENST00000338588.3	family with sequence similarity 180, member A	51	2	1	0	1	1
RBM33	ENST00000341148.3	RNA binding motif protein 33	444	4	2	1	1	2
RSPH4A	ENST00000368581.4	radial spoke head 4 homolog A (Chlamydomonas)	5	2	1	0	1	1
GLRA2	ENST00000218075.4	glycine receptor, alpha 2	5	3	3	0	0	0
AP3S2	ENST00000336418.4	adaptor-related protein complex 3, sigma 2 subunit	985	3	2	1	0	1
TUBB4A	ENST00000264071.2	tubulin, beta 4A class IVa	8	2	1	1	0	0
HOXC9	ENST00000303450.4	homeobox C9	248	2	1	0	1	0
HIGD1A	ENST00000321331.7	HIG1 hypoxia inducible domain family, member 1A	254	2	1	0	1	0
GART	ENST00000361093.5	phosphoribosylglycinamide formyltransferase, phosphoribosylglycinamide synthetase, phosphoribosylaminoimidazole synthetase	2813	2	2	0	0	0
RABL2A	ENST00000393167.3	RAB, member of RAS oncogene family-like 2A	11	3	1	2	0	0
OTX1	ENST00000366671.3	orthodenticle homeobox 1	11	2	2	0	0	2
ZNF365	ENST00000395254.3	zinc finger protein 365	173	4	4	0	0	0
LGALS9C	ENST00000328114.6	lectin, galactoside-binding, soluble, 9C	5	1	1	0	0	0
LGALS9B	ENST00000423676.3	lectin, galactoside-binding, soluble, 9B	5	1	1	0	0	0
EIF4E	ENST00000450253.2	eukaryotic translation initiation factor 4E	876	1	1	0	0	0
HMGA2	ENST00000403681.2	high mobility group AT-hook 2	8021	2	2	0	0	1
ATXN1	ENST00000244769.4	ataxin 1	106	7	4	1	2	1
IFFO2	ENST00000455833.2	intermediate filament family orphan 2	139	8	5	2	1	1
MEIS2	ENST00000397624.3	Meis homeobox 2	63	3	2	0	1	2
PAXIP1-AS2	ENST00000397551.2	PAXIP1 antisense RNA 2	5	1	1	0	0	0
TMEM8C	ENST00000339996.3	transmembrane protein 8C	5	1	1	0	0	0
POU4F2	ENST00000281321.3	POU class 4 homeobox 2	5	3	1	0	2	0
INHBA	ENST00000242208.4	inhibin, beta A	1260	4	2	2	0	1
PFN1	ENST00000225655.5	profilin 1	7729	1	1	0	0	0
SLCO3A1	ENST00000318445.6	solute carrier organic anion transporter family, member 3A1	133	3	2	0	1	1
DRAXIN	ENST00000294485.5	dorsal inhibitory axon guidance protein	5	8	4	4	0	0
NRP2	ENST00000360409.3	neuropilin 2	146	6	5	0	1	1
B3GNT9	ENST00000449549.3	UDP-GlcNAc:betaGal beta-1,3-N-acetylglucosaminyltransferase 9	56	2	1	0	1	0
NHS	ENST00000380060.3	Nance-Horan syndrome (congenital cataracts and dental anomalies)	72	4	1	1	2	1
NRXN3	ENST00000281127.7	neurexin 3	14	6	2	2	2	0
PGBD1	ENST00000259883.3	piggyBac transposable element derived 1	452	1	1	0	0	0
TCF24	ENST00000563496.1	transcription factor 24	11	2	1	0	1	0
C1QL3	ENST00000298943.3	complement component 1, q subcomponent-like 3	77	3	1	1	1	1
CYTL1	ENST00000307746.4	cytokine-like 1	15	2	1	1	0	0
SCN8A	ENST00000354534.6	sodium channel, voltage gated, type VIII, alpha subunit	44	6	3	0	3	0
JARID2	ENST00000341776.2	jumonji, AT rich interactive domain 2	199	4	3	0	1	0
ASCL1	ENST00000266744.3	achaete-scute complex homolog 1 (Drosophila)	5	2	2	0	0	0
IQGAP2	ENST00000274364.6	IQ motif containing GTPase activating protein 2	588	3	3	0	0	0
SLC4A4	ENST00000340595.3	solute carrier family 4 (sodium bicarbonate cotransporter), member 4	400	7	4	1	2	0
METTL8	ENST00000375258.4	methyltransferase like 8	124	5	5	0	0	0
CREG1	ENST00000370509.4	cellular repressor of E1A-stimulated genes 1	318	3	1	1	1	0
MUC13	ENST00000311075.3	mucin 13, cell surface associated	43	5	5	0	0	1
GNAL	ENST00000334049.6	guanine nucleotide binding protein (G protein), alpha activating activity polypeptide, olfactory type	99	7	5	1	1	1
C16orf58	ENST00000570164.1	chromosome 16 open reading frame 58	25	4	2	1	1	0
BCL2L11	ENST00000393256.3	BCL2-like 11 (apoptosis facilitator)	105	5	3	2	0	0
NAGPA	ENST00000312251.3	N-acetylglucosamine-1-phosphodiester alpha-N-acetylglucosaminidase	297	2	2	0	0	0
SEPT3	ENST00000396425.3	septin 3	241	4	1	0	3	0
ANKRD34C	ENST00000421388.2	ankyrin repeat domain 34C	5	6	4	1	1	0
CCDC85A	ENST00000407595.2	coiled-coil domain containing 85A	46	2	2	0	0	0
CYB5RL	ENST00000419823.2	cytochrome b5 reductase-like	7	3	3	0	0	0
POU3F2	ENST00000328345.5	POU class 3 homeobox 2	274	3	1	0	2	0
POU3F4	ENST00000373200.2	POU class 3 homeobox 4	5	1	1	0	0	0
HIVEP3	ENST00000372583.1	human immunodeficiency virus type I enhancer binding protein 3	84	1	1	0	0	1
SETD3	ENST00000331768.5	SET domain containing 3	58	3	3	0	0	0
SSR1	ENST00000244763.4	signal sequence receptor, alpha	12917	4	2	1	1	1
SYS1	ENST00000243918.5	SYS1 Golgi-localized integral membrane protein homolog (S. cerevisiae)	384	3	2	1	0	0
TMEM150C	ENST00000515780.2	transmembrane protein 150C	8	2	2	0	0	1
GGACT	ENST00000376250.2	gamma-glutamylamine cyclotransferase	164	2	2	0	0	0
AC104667.3	ENST00000452801.1		5	1	1	0	0	0
PSTK	ENST00000405485.1	phosphoseryl-tRNA kinase	530	2	1	1	0	0
LAMTOR1	ENST00000538404.1	late endosomal/lysosomal adaptor, MAPK and MTOR activator 1	1317	2	1	1	0	0
FNDC3A	ENST00000492622.2	fibronectin type III domain containing 3A	122	5	4	1	0	2
PCDHGA11	ENST00000398587.2	protocadherin gamma subfamily A, 11	145	3	3	0	0	0
IGFBP3	ENST00000381086.5	insulin-like growth factor binding protein 3	1857	2	1	0	1	0
PGRMC1	ENST00000217971.7	progesterone receptor membrane component 1	762	3	3	0	0	0
KRTAP5-2	ENST00000412090.1	keratin associated protein 5-2	5	2	1	1	0	0
SLMAP	ENST00000295951.3	sarcolemma associated protein	208	3	2	0	1	2
ZC3H12D	ENST00000416573.2	zinc finger CCCH-type containing 12D	13	4*	3	0	0	0
ANGPTL7	ENST00000376819.3	angiopoietin-like 7	5	2	2	0	0	0
RUNX1T1	ENST00000523629.1	runt-related transcription factor 1; translocated to, 1 (cyclin D-related)	9	6	4	1	1	1
PLCXD3	ENST00000377801.3	phosphatidylinositol-specific phospholipase C, X domain containing 3	81	6	4	2	0	1
JMJD8	ENST00000412368.2	jumonji domain containing 8	164	2	2	0	0	0
NUDT13	ENST00000372997.3	nudix (nucleoside diphosphate linked moiety X)-type motif 13	10	3	0	1	2	0
RIMS1	ENST00000348717.5	regulating synaptic membrane exocytosis 1	45	5	4	1	0	0
PCDH17	ENST00000377918.3	protocadherin 17	477	5	5	0	0	0
TMOD2	ENST00000249700.4	tropomodulin 2 (neuronal)	117	6	3	2	1	5
PAX5	ENST00000358127.4	paired box 5	5	7	1	4	2	0
C2orf88	ENST00000340623.4	chromosome 2 open reading frame 88	156	2	2	0	0	0
ITGA1	ENST00000282588.6	integrin, alpha 1	400	8	5	1	2	2
ZMAT4	ENST00000315769.7	zinc finger, matrin-type 4	5	2	2	0	0	1
VWA5B2	ENST00000426955.2	von Willebrand factor A domain containing 5B2	14	2	1	1	0	0
AKAP2	ENST00000374525.1	A kinase (PRKA) anchor protein 2	1287	6	5	1	0	3
PBOV1	ENST00000527246.2	prostate and breast cancer overexpressed 1	5	2	1	1	0	0
VPS36	ENST00000378060.4	vacuolar protein sorting 36 homolog (S. cerevisiae)	57	4	4	0	0	1
ACSM5	ENST00000331849.4	acyl-CoA synthetase medium-chain family member 5	5	1	1	0	0	1
C15orf38-AP3S2	ENST00000398333.3	C15orf38-AP3S2 readthrough	985	3	2	1	0	1
BAZ2B	ENST00000392782.1	bromodomain adjacent to zinc finger domain, 2B	25	5	4	1	0	1
RBBP9	ENST00000337227.4	retinoblastoma binding protein 9	102	2	1	0	1	0
PRDM6	ENST00000407847.4	PR domain containing 6	69	6	2	2	2	1
FSTL4	ENST00000265342.7	follistatin-like 4	60	6	3	2	1	1
LHFPL3	ENST00000535008.1	lipoma HMGIC fusion partner-like 3	5	3	0	0	3	0
HOXC13	ENST00000243056.3	homeobox C13	63	2	1	1	0	0
NGDN	ENST00000397154.3	neuroguidin, EIF4E binding protein	679	2	2	0	0	0
PCDHGB3	ENST00000576222.1	protocadherin gamma subfamily B, 3	145	3	3	0	0	0
CHN1	ENST00000409900.3	chimerin 1	344	2	1	1	0	0
CYGB	ENST00000293230.5	cytoglobin	10	2	1	1	0	0
ZSWIM1	ENST00000372523.1	zinc finger, SWIM-type containing 1	72	1	1	0	0	0
PCDHGB4	ENST00000519479.1	protocadherin gamma subfamily B, 4	145	3	3	0	0	0
MRAP	ENST00000399784.2	melanocortin 2 receptor accessory protein	5	1	1	0	0	0
NTNG2	ENST00000393229.3	netrin G2	15	2	2	0	0	0
CALCOCO1	ENST00000548263.1	calcium binding and coiled-coil domain 1	68	4	3	0	1	1
PCDHGB6	ENST00000520790.1	protocadherin gamma subfamily B, 6	145	3	3	0	0	0
PCDHGB7	ENST00000398594.2	protocadherin gamma subfamily B, 7	145	3	3	0	0	0
PCDHGA2	ENST00000394576.2	protocadherin gamma subfamily A, 2	145	3	3	0	0	0
PCDHGA10	ENST00000398610.2	protocadherin gamma subfamily A, 10	145	3	3	0	0	0
PCDHGA3	ENST00000253812.6	protocadherin gamma subfamily A, 3	145	3	3	0	0	0
PCDHGA12	ENST00000252085.3	protocadherin gamma subfamily A, 12	145	3	3	0	0	0
PCDHGA9	ENST00000573521.1	protocadherin gamma subfamily A, 9	145	3	3	0	0	0
PCDHGA1	ENST00000517417.1	protocadherin gamma subfamily A, 1	145	3	3	0	0	0
PCDHGA8	ENST00000398604.2	protocadherin gamma subfamily A, 8	145	3	3	0	0	0
PCDHGA6	ENST00000517434.1	protocadherin gamma subfamily A, 6	145	3	3	0	0	0
PCDHGA4	ENST00000571252.1	protocadherin gamma subfamily A, 4	145	3	3	0	0	0
PCDHGB1	ENST00000523390.1	protocadherin gamma subfamily B, 1	145	3	3	0	0	0
PCDHGB2	ENST00000522605.1	protocadherin gamma subfamily B, 2	145	3	3	0	0	0
RP1-170O19.20	ENST00000470747.4	Uncharacterized protein	151	2	1	0	1	0
KCNG3	ENST00000306078.1	potassium voltage-gated channel, subfamily G, member 3	55	3	2	0	1	1
CARM1	ENST00000327064.4	coactivator-associated arginine methyltransferase 1	663	2	2	0	0	0
RGS21	ENST00000417209.2	regulator of G-protein signaling 21	5	1	1	0	0	0
PCDHGC4	ENST00000306593.1	protocadherin gamma subfamily C, 4	145	3	3	0	0	0
PCDHGA7	ENST00000518325.1	protocadherin gamma subfamily A, 7	145	3	3	0	0	0
PCDHGC3	ENST00000308177.3	protocadherin gamma subfamily C, 3	145	3	3	0	0	0
POC1B	ENST00000378528.2	POC1 centriolar protein B	61	2	0	1	1	1
PRKAA1	ENST00000397128.2	protein kinase, AMP-activated, alpha 1 catalytic subunit	1415	4	2	0	2	0
PCDHGC5	ENST00000252087.1	protocadherin gamma subfamily C, 5	145	3	3	0	0	0
SLA	ENST00000338087.5	Src-like-adaptor	5	2	2	0	0	1
OPA3	ENST00000263275.4	optic atrophy 3 (autosomal recessive, with chorea and spastic paraplegia)	137	3	1	1	1	0
PRKCI	ENST00000295797.4	protein kinase C, iota	103	2	2	0	0	0
IFNLR1	ENST00000327575.2	interferon, lambda receptor 1	15	5	4	1	0	0
VKORC1	ENST00000300851.6	vitamin K epoxide reductase complex, subunit 1	614	1	1	0	0	0
TIGD5	ENST00000504548.2	tigger transposable element derived 5	823	2	2	0	0	0
CLEC7A	ENST00000298523.5	C-type lectin domain family 7, member A	5	1	1	0	0	1
DSE	ENST00000452085.3	dermatan sulfate epimerase	975	2	1	0	1	1
VEGFB	ENST00000309422.2	vascular endothelial growth factor B	4432	1	1	0	0	0
GLB1L	ENST00000295759.7	galactosidase, beta 1-like	192	1	1	0	0	0
DLG4	ENST00000399506.2	discs, large homolog 4 (Drosophila)	75	3	2	1	0	0
UBXN10	ENST00000375099.3	UBX domain protein 10	5	4	1	3	0	0
ARHGDIB	ENST00000228945.4	Rho GDP dissociation inhibitor (GDI) beta	93	1	1	0	0	0
FBXL14	ENST00000339235.3	F-box and leucine-rich repeat protein 14	76	1	1	0	0	1
RS1	ENST00000379984.3	retinoschisin 1	5	2	2	0	0	0
CTSZ	ENST00000217131.5	cathepsin Z	363	3	3	0	0	1
PRC1	ENST00000361919.3	protein regulator of cytokinesis 1	288	2	1	0	1	0
SMIM20	ENST00000514384.1	small integral membrane protein 20	2638	1	1	0	0	0
SLC25A44	ENST00000359511.4	solute carrier family 25, member 44	760	4	1	2	1	0
IGF2BP2	ENST00000382199.2	insulin-like growth factor 2 mRNA binding protein 2	5	3	1	1	1	0
GAREML	ENST00000401533.2	GRB2 associated, regulator of MAPK1-like	496	3	1	2	0	0
AGR2	ENST00000419304.2	anterior gradient 2	13	6	4	1	1	1
PALM2-AKAP2	ENST00000374530.3	PALM2-AKAP2 readthrough	1287	6	5	1	0	3
EGR3	ENST00000519492.1	early growth response 3	21	2	1	1	0	0
THSD7A	ENST00000423059.4	thrombospondin, type I, domain containing 7A	5	4	4	0	0	0
GRIK3	ENST00000373091.3	glutamate receptor, ionotropic, kainate 3	7	9	4	1	4	0
SLC10A7	ENST00000264986.3	solute carrier family 10, member 7	77	2	1	0	1	1
CDK5R1	ENST00000313401.3	cyclin-dependent kinase 5, regulatory subunit 1 (p35)	335	3	1	0	2	1
HOXB2	ENST00000330070.4	homeobox B2	1282	1	1	0	0	0
RSPO2	ENST00000517939.1	R-spondin 2	5	2	1	0	1	0
RIC8B	ENST00000392837.4	RIC8 guanine nucleotide exchange factor B	49	3	2	1	0	0
AKAP7	ENST00000431975.2	A kinase (PRKA) anchor protein 7	21	2	2	0	0	0
CYCS	ENST00000305786.2	cytochrome c, somatic	320	2	0	1	1	2
PODN	ENST00000371500.3	podocan	5	2	2	0	0	1
ZNF516	ENST00000443185.2	zinc finger protein 516	311	3	1	1	1	0
MYL12B	ENST00000237500.5	myosin, light chain 12B, regulatory	1944	1	1	0	0	0
WIPF2	ENST00000323571.4	WAS/WASL interacting protein family, member 2	214	4	2	1	1	1
AC132216.1	ENST00000330381.2	HCG1785179; PRO1787; Uncharacterized protein	5	1	1	0	0	0
C14orf23	ENST00000399387.4	chromosome 14 open reading frame 23	5	1	1	0	0	0
MBNL3	ENST00000370839.3	muscleblind-like splicing regulator 3	593	9	5	2	2	0
LIN28B	ENST00000345080.4	lin-28 homolog B (C. elegans)	118	2	2	0	0	0
COX10	ENST00000261643.3	cytochrome c oxidase assembly homolog 10 (yeast)	72	4	2	2	0	1
AGGF1	ENST00000312916.7	angiogenic factor with G patch and FHA domains 1	890	3	1	0	2	0
TMEM196	ENST00000405844.1	transmembrane protein 196	5	3	0	0	3	0
SIAH2	ENST00000312960.3	siah E3 ubiquitin protein ligase 2	228	4	1	2	1	0
RRAS2	ENST00000537760.1	related RAS viral (r-ras) oncogene homolog 2	57	1	1	0	0	0
PARK2	ENST00000366898.1	parkin RBR E3 ubiquitin protein ligase	55	3	1	1	1	0
BAALC	ENST00000438105.2	brain and acute leukemia, cytoplasmic	137	1	1	0	0	1
HOXB4	ENST00000332503.5	homeobox B4	214	2	1	0	1	0
SHANK2	ENST00000449833.2	SH3 and multiple ankyrin repeat domains 2	26	7	5	1	1	0
NCOA2	ENST00000452400.2	nuclear receptor coactivator 2	271	3	2	1	0	2
CLEC4G	ENST00000328853.5	C-type lectin domain family 4, member G	5	1	1	0	0	0
SGCD	ENST00000435422.3	sarcoglycan, delta (35kDa dystrophin-associated glycoprotein)	39	4	2	1	1	1
WDR5B	ENST00000330689.4	WD repeat domain 5B	23	1	1	0	0	0
PUS10	ENST00000398658.2	pseudouridylate synthase 10	72	1	1	0	0	0
FEZF1	ENST00000442488.2	FEZ family zinc finger 1	47	2	0	0	2	0
UTS2	ENST00000377516.2	urotensin 2	5	2	1	0	1	0
ZNF248	ENST00000395867.3	zinc finger protein 248	43	6	5	1	0	0
CAMK2N1	ENST00000375078.3	calcium/calmodulin-dependent protein kinase II inhibitor 1	6631	2	0	0	2	0
MAP3K7CL	ENST00000286791.5	MAP3K7 C-terminal like	87	1	1	0	0	1
PRRG4	ENST00000257836.3	proline rich Gla (G-carboxyglutamic acid) 4 (transmembrane)	47	3	0	2	1	0
RAB9B	ENST00000243298.2	RAB9B, member RAS oncogene family	21	1	1	0	0	1
ICT1	ENST00000301585.5	immature colon carcinoma transcript 1	857	1	1	0	0	0
DESI2	ENST00000302550.11	desumoylating isopeptidase 2	147	2	2	0	0	0
CCBL2	ENST00000370485.2	cysteine conjugate-beta lyase 2	409	1	1	0	0	0
CDV3	ENST00000420115.2	CDV3 homolog (mouse)	523	3	2	0	1	0
COL14A1	ENST00000297848.3	collagen, type XIV, alpha 1	117	3	3	0	0	0
RPL29	ENST00000294189.6	ribosomal protein L29	8437	1	0	1	0	1
LDLRAD4	ENST00000399848.3	low density lipoprotein receptor class A domain containing 4	314	7	4	2	1	3
LMX1B	ENST00000355497.5	LIM homeobox transcription factor 1, beta	8	4	2	2	0	0
CPN1	ENST00000370418.3	carboxypeptidase N, polypeptide 1	21	7	6	1	0	0
KLHL13	ENST00000371882.1	kelch-like family member 13	13	2	1	0	1	0
BEND3	ENST00000369042.1	BEN domain containing 3	13	5	4	1	0	0
CCDC12	ENST00000425441.1	coiled-coil domain containing 12	139	1	1	0	0	0
TGFA	ENST00000295400.6	transforming growth factor, alpha	36	2	1	0	1	1
MEX3A	ENST00000532414.2	mex-3 RNA binding family member A	912	5	3	1	1	2
HOXA9	ENST00000396345.1	homeobox A9	151	2	1	0	1	0
MYD88	ENST00000495303.1	myeloid differentiation primary response 88	319	3	1	1	1	0
KCNE1	ENST00000399289.3	potassium voltage-gated channel, Isk-related family, member 1	5	2	1	1	0	2
RBAK	ENST00000396912.1	RB-associated KRAB zinc finger	99	3	1	1	1	0
LYRM2	ENST00000520318.1	LYR motif containing 2	305	1	1	0	0	0
CNKSR2	ENST00000379510.3	connector enhancer of kinase suppressor of Ras 2	85	5	4	1	0	0
GNAZ	ENST00000248996.4	guanine nucleotide binding protein (G protein), alpha z polypeptide	50	3	1	1	1	1
TTLL7	ENST00000260505.8	tubulin tyrosine ligase-like family, member 7	93	3	1	0	2	2
FAM169B	ENST00000558256.1	family with sequence similarity 169, member B	5	1	1	0	0	0
DIMT1	ENST00000199320.4	DIM1 dimethyladenosine transferase 1 homolog (S. cerevisiae)	481	1	1	0	0	0
AHNAK2	ENST00000557457.1	AHNAK nucleoprotein 2	29	2	1	1	0	0
IL1RAP	ENST00000072516.3	interleukin 1 receptor accessory protein	313	3	1	2	0	0
GABRP	ENST00000519385.1	gamma-aminobutyric acid (GABA) A receptor, pi	5	1	1	0	0	0
PAX4	ENST00000338516.3	paired box 4	5	1	1	0	0	0
ABHD17B	ENST00000333421.6	abhydrolase domain containing 17B	104	1	1	0	0	1
IL17D	ENST00000304920.3	interleukin 17D	130	1	1	0	0	0
MED14	ENST00000324817.1	mediator complex subunit 14	1038	1	1	0	0	0
MAP7D3	ENST00000316077.9	MAP7 domain containing 3	142	5	4	0	1	1
C1orf116	ENST00000359470.5	chromosome 1 open reading frame 116	17	3	0	2	1	1
FSTL1	ENST00000295633.3	follistatin-like 1	6788	3	1	0	2	0
MT-ND4L	ENST00000361335.1	mitochondrially encoded NADH dehydrogenase 4L	8219	2	1	1	0	0
PLEKHG5	ENST00000377725.1	pleckstrin homology domain containing, family G (with RhoGef domain) member 5	284	2	1	1	0	0
CYB5D1	ENST00000571846.1	cytochrome b5 domain containing 1	546	2	0	2	0	2
MGAT5	ENST00000409645.1	mannosyl (alpha-1,6-)-glycoprotein beta-1,6-N-acetyl-glucosaminyltransferase	1627	5	4	1	0	0
SIX3	ENST00000260653.3	SIX homeobox 3	15	1	1	0	0	1
UBTF	ENST00000343638.5	upstream binding transcription factor, RNA polymerase I	1090	5	3	2	0	0
MON1B	ENST00000248248.3	MON1 secretory trafficking family member B	910	2	2	0	0	0
MUC4	ENST00000349607.4	mucin 4, cell surface associated	5	2	1	1	0	0
MEOX1	ENST00000329168.3	mesenchyme homeobox 1	5	2	1	1	0	0
HDAC8	ENST00000439122.2	histone deacetylase 8	24	1	1	0	0	1
PORCN	ENST00000355961.4	porcupine homolog (Drosophila)	35	1	1	0	0	0
MDFIC	ENST00000393486.1	MyoD family inhibitor domain containing	601	2	2	0	0	1
FAM19A3	ENST00000361886.3	family with sequence similarity 19 (chemokine (C-C motif)-like), member A3	5	2	0	1	1	0
ARHGEF38	ENST00000420470.2	Rho guanine nucleotide exchange factor (GEF) 38	5	2	1	1	0	0
KDM6B	ENST00000254846.5	lysine (K)-specific demethylase 6B	8	3	3	0	0	0
ADAM12	ENST00000368679.4	ADAM metallopeptidase domain 12	758	6	1	2	3	0
KCNV2	ENST00000382082.3	potassium channel, subfamily V, member 2	5	1	1	0	0	0
DRGX	ENST00000374139.2	dorsal root ganglia homeobox	5	1	1	0	0	1
GABRE	ENST00000370325.1	gamma-aminobutyric acid (GABA) A receptor, epsilon	6	2	2	0	0	0
ADO	ENST00000373783.1	2-aminoethanethiol (cysteamine) dioxygenase	686	3	2	0	1	0
ABCA8	ENST00000269080.2	ATP-binding cassette, sub-family A (ABC1), member 8	21	1	1	0	0	0
EBF3	ENST00000368648.3	early B-cell factor 3	101	5	5	0	0	0
KCNN3	ENST00000271915.4	potassium intermediate/small conductance calcium-activated channel, subfamily N, member 3	5	4	1	1	2	1
AUH	ENST00000375731.4	AU RNA binding protein/enoyl-CoA hydratase	66	3	2	0	1	0
NLGN3	ENST00000374051.3	neuroligin 3	15	2	1	0	1	0
VIPR2	ENST00000262178.2	vasoactive intestinal peptide receptor 2	35	8	5	1	2	0
WDR20	ENST00000335263.5	WD repeat domain 20	288	1	1	0	0	0
HOXA5	ENST00000222726.3	homeobox A5	63	1	1	0	0	0
SYNJ2BP	ENST00000256366.4	synaptojanin 2 binding protein	329	3	2	0	1	0
PCDH8	ENST00000377942.3	protocadherin 8	11	1	1	0	0	0
C3orf70	ENST00000335012.2	chromosome 3 open reading frame 70	19	2	2	0	0	3
VANGL1	ENST00000355485.2	VANGL planar cell polarity protein 1	721	3	2	0	1	2
FRMPD2	ENST00000474573.1	FERM and PDZ domain containing 2	5	1	1	0	0	0
TMEM215	ENST00000342743.5	transmembrane protein 215	5	3	2	1	0	0
MOCS2	ENST00000450852.3	molybdenum cofactor synthesis 2	100	2	1	0	1	0
TMTC3	ENST00000266712.6	transmembrane and tetratricopeptide repeat containing 3	406	4	2	2	0	0
C10orf128	ENST00000374151.3	chromosome 10 open reading frame 128	0	2	1	0	1	0
CNIH3	ENST00000272133.3	cornichon family AMPA receptor auxiliary protein 3	28	1	1	0	0	0
WNT5A	ENST00000474267.1	wingless-type MMTV integration site family, member 5A	2080	7	4	2	1	0
WNT4	ENST00000290167.6	wingless-type MMTV integration site family, member 4	5	3	2	0	1	0
AC010336.1	ENST00000539278.1	Uncharacterized protein	8	1	1	0	0	1
TIMP2	ENST00000585421.1	TIMP metallopeptidase inhibitor 2	3147	3	1	1	1	0
FOXP3	ENST00000376207.4	forkhead box P3	7	2	0	0	2	1
MOXD1	ENST00000367963.3	monooxygenase, DBH-like 1	168	1	1	0	0	0
PIANP	ENST00000534837.1	PILR alpha associated neural protein	8	7	6	0	1	0
INTS4	ENST00000534064.1	integrator complex subunit 4	43	1	1	0	0	0
SPATA6	ENST00000371847.3	spermatogenesis associated 6	23	4	4	0	0	0
AMER2	ENST00000357816.2	APC membrane recruitment protein 2	7	6	5	0	1	1
CD19	ENST00000538922.1	CD19 molecule	5	1	1	0	0	0
ZDHHC21	ENST00000380916.4	zinc finger, DHHC-type containing 21	196	7	4	2	1	2
SKI	ENST00000378536.4	v-ski avian sarcoma viral oncogene homolog	613	5	4	1	0	0
C8orf48	ENST00000297324.4	chromosome 8 open reading frame 48	22	1	1	0	0	0
ZNF641	ENST00000301042.3	zinc finger protein 641	87	2	2	0	0	0
ELMOD2	ENST00000323570.3	ELMO/CED-12 domain containing 2	32	1	1	0	0	0
NKG7	ENST00000595217.1	natural killer cell group 7 sequence	5	1	0	1	0	0
TRPV3	ENST00000301365.4	transient receptor potential cation channel, subfamily V, member 3	13	6	4	1	1	1
FBXO36	ENST00000373652.3	F-box protein 36	5	1	1	0	0	0
EMX2	ENST00000442245.4	empty spiracles homeobox 2	54	1	1	0	0	1
LCMT2	ENST00000567039.1	leucine carboxyl methyltransferase 2	274	1	1	0	0	0
TMEM221	ENST00000341130.5	transmembrane protein 221	5	2	0	0	2	0
AGPAT3	ENST00000291572.8	1-acylglycerol-3-phosphate O-acyltransferase 3	2443	4	0	2	2	0
GDF7	ENST00000272224.3	growth differentiation factor 7	27	2	1	0	1	1
LHX1	ENST00000254457.5	LIM homeobox 1	15	2	1	1	0	0
RNF220	ENST00000372247.2	ring finger protein 220	474	2	0	0	2	1
ITGA9	ENST00000264741.5	integrin, alpha 9	9	5	4	1	0	0
ITGA11	ENST00000423218.2	integrin, alpha 11	390	6	5	1	0	0
FRMD5	ENST00000484674.1	FERM domain containing 5	161	7	4	1	2	0
BTBD3	ENST00000254977.3	BTB (POZ) domain containing 3	3798	2	1	1	0	2
MYLK4	ENST00000268446.5	myosin light chain kinase family, member 4	5	3	1	0	2	1
NIPAL2	ENST00000341166.3	NIPA-like domain containing 2	7	2	1	0	1	0
SLC35B4	ENST00000378509.4	solute carrier family 35 (UDP-xylose/UDP-N-acetylglucosamine transporter), member B4	899	3	0	2	1	0
NLE1	ENST00000586869.1	notchless homolog 1 (Drosophila)	526	3	2	1	0	0
BATF2	ENST00000301887.4	basic leucine zipper transcription factor, ATF-like 2	5	1	1	0	0	0
CLEC1B	ENST00000428126.2	C-type lectin domain family 1, member B	5	2	0	0	2	1
PELI2	ENST00000267460.4	pellino E3 ubiquitin protein ligase family member 2	229	2	2	0	0	0
TMEM74	ENST00000297459.3	transmembrane protein 74	5	1	1	0	0	0
LSMEM2	ENST00000316436.3	leucine-rich single-pass membrane protein 2	7	1	1	0	0	0
KRT6C	ENST00000252250.6	keratin 6C	5	1	1	0	0	0
MMP20	ENST00000260228.2	matrix metallopeptidase 20	5	2	0	1	1	0
FGF2	ENST00000264498.3	fibroblast growth factor 2 (basic)	123	3	2	0	1	0
FGF14	ENST00000376131.4	fibroblast growth factor 14	5	2	1	0	1	0
ARFGAP3	ENST00000263245.5	ADP-ribosylation factor GTPase activating protein 3	6000	2	0	1	1	0
PINX1	ENST00000426190.2	PIN2/TERF1 interacting, telomerase inhibitor 1	224	3	1	1	1	0
CYP2S1	ENST00000310054.4	cytochrome P450, family 2, subfamily S, polypeptide 1	150	1	0	0	1	1
RNF122	ENST00000256257.1	ring finger protein 122	16	1	1	0	0	0
ULK1	ENST00000321867.4	unc-51 like autophagy activating kinase 1	3083	3	2	1	0	0
CAPN3	ENST00000356316.3	calpain 3, (p94)	34	1	1	0	0	0
ENDOV	ENST00000323854.5	endonuclease V	79	1	1	0	0	0
PDGFRL	ENST00000251630.6	platelet-derived growth factor receptor-like	48	1	1	0	0	0
MTFR2	ENST00000451457.2	mitochondrial fission regulator 2	87	1	1	0	0	0
GPX8	ENST00000296734.6	glutathione peroxidase 8 (putative)	2107	3	2	1	0	0
FAM63B	ENST00000559228.1	family with sequence similarity 63, member B	41	3	2	1	0	1
SMO	ENST00000249373.3	smoothened, frizzled family receptor	142	2	2	0	0	0
FAM84A	ENST00000295092.2	family with sequence similarity 84, member A	69	9	6	3	0	0
PPP1R1A	ENST00000257905.8	protein phosphatase 1, regulatory (inhibitor) subunit 1A	17	1	1	0	0	0
PLXDC2	ENST00000377252.4	plexin domain containing 2	506	2	1	0	1	1
EPHX3	ENST00000221730.3	epoxide hydrolase 3	5	2	0	0	2	0
ATP6V0D2	ENST00000285393.3	ATPase, H+ transporting, lysosomal 38kDa, V0 subunit d2	5	1	1	0	0	0
CD160	ENST00000369290.1	CD160 molecule	5	2	0	0	2	0
KCNJ6	ENST00000609713.1	potassium inwardly-rectifying channel, subfamily J, member 6	5	9	6	3	0	3
MAEA	ENST00000303400.4	macrophage erythroblast attacher	5906	1	1	0	0	0
MAP7D1	ENST00000316156.4	MAP7 domain containing 1	1052	2	0	1	1	0
CHRDL1	ENST00000372045.1	chordin-like 1	5	3	1	1	1	1
HOXC4	ENST00000430889.2	Homeobox protein Hox-C4	508	1	1	0	0	0
ARHGEF9	ENST00000253401.6	Cdc42 guanine nucleotide exchange factor (GEF) 9	13	2	1	0	1	0
FAM46A	ENST00000369754.3	family with sequence similarity 46, member A	899	3	1	1	1	1
C6orf223	ENST00000439969.2	chromosome 6 open reading frame 223	17	4	2	0	2	0
GNAT1	ENST00000232461.3	guanine nucleotide binding protein (G protein), alpha transducing activity polypeptide 1	8	2	1	1	0	0
BCL2L12	ENST00000246784.3	BCL2-like 12 (proline rich)	355	1	1	0	0	0
MSRA	ENST00000317173.4	methionine sulfoxide reductase A	81	1	1	0	0	0
CLDN7	ENST00000538261.3	claudin 7	29	1	1	0	0	0
EFCAB12	ENST00000505956.1	EF-hand calcium binding domain 12	37	1	1	0	0	0
HOXA2	ENST00000222718.5	homeobox A2	14	3	3	0	0	0
C1orf213	ENST00000335648.3	chromosome 1 open reading frame 213	49	1	1	0	0	1
TREML2	ENST00000483722.1	triggering receptor expressed on myeloid cells-like 2	5	3	1	0	2	0
RP11-625H11.1	ENST00000558940.1	Uncharacterized protein	5	1	1	0	0	0
NTRK2	ENST00000395882.1	neurotrophic tyrosine kinase, receptor, type 2	48	1	1	0	0	3
HRH3	ENST00000340177.5	histamine receptor H3	5	3	0	3	0	0
MNT	ENST00000174618.4	MNT, MAX dimerization protein	146	3	2	1	0	0
PLAC8	ENST00000311507.4	placenta-specific 8	212	1	0	1	0	0
C12orf39	ENST00000256969.2	chromosome 12 open reading frame 39	65	2	1	0	1	0
C16orf92	ENST00000300575.2	chromosome 16 open reading frame 92	5	1	1	0	0	0
DLG1	ENST00000346964.2	discs, large homolog 1 (Drosophila)	813	2	1	0	1	0
ZBTB25	ENST00000608382.1	zinc finger and BTB domain containing 25	149	2	2	0	0	0
CALB1	ENST00000265431.3	calbindin 1, 28kDa	5	1	1	0	0	0
GULP1	ENST00000409843.1	GULP, engulfment adaptor PTB domain containing 1	196	1	1	0	0	0
KCNK12	ENST00000327876.4	potassium channel, subfamily K, member 12	5	3	0	1	2	0
FHL1	ENST00000394155.2	four and a half LIM domains 1	239	3	0	1	2	0
SPOCK2	ENST00000373109.2	sparc/osteonectin, cwcv and kazal-like domains proteoglycan (testican) 2	31	2	1	0	1	1
CREBL2	ENST00000228865.2	cAMP responsive element binding protein-like 2	218	3*	1	0	1	1
ZNF80	ENST00000482457.2	zinc finger protein 80	5	1	1	0	0	0
P2RY13	ENST00000325602.5	purinergic receptor P2Y, G-protein coupled, 13	5	1	1	0	0	1
BEND6	ENST00000370750.2	BEN domain containing 6	11	1	1	0	0	1
KLHL38	ENST00000325995.7	kelch-like family member 38	13	3	1	1	1	1
SETD7	ENST00000274031.3	SET domain containing (lysine methyltransferase) 7	76	4	3	1	0	1
LCLAT1	ENST00000309052.4	lysocardiolipin acyltransferase 1	397	2	0	2	0	1
NAPEPLD	ENST00000417955.1	N-acyl phosphatidylethanolamine phospholipase D	13	3	3	0	0	0
MCMDC2	ENST00000422365.2	minichromosome maintenance domain containing 2	7	2	1	0	1	0
TUB	ENST00000305253.4	tubby bipartite transcription factor	743	4	2	0	2	1
USP45	ENST00000392738.2	ubiquitin specific peptidase 45	491	2	1	0	1	0
TGFB2	ENST00000366930.4	transforming growth factor, beta 2	157	6	4	0	2	1
CHST3	ENST00000373115.4	carbohydrate (chondroitin 6) sulfotransferase 3	217	4	2	2	0	1
CTDSP2	ENST00000398073.2	CTD (carboxy-terminal domain, RNA polymerase II, polypeptide A) small phosphatase 2	991	2	0	1	1	0
CMKLR1	ENST00000312143.7	chemokine-like receptor 1	5	4	2	1	1	0
RTN1	ENST00000395090.1	reticulon 1	80	1	1	0	0	0
JPH4	ENST00000356300.4	junctophilin 4	5	2	1	1	0	0
PRRC2B	ENST00000372249.1	proline-rich coiled-coil 2B	97	2	2	0	0	0
SLC9A2	ENST00000233969.2	solute carrier family 9, subfamily A (NHE2, cation proton antiporter 2), member 2	27	1	1	0	0	0
MMP9	ENST00000372330.3	matrix metallopeptidase 9 (gelatinase B, 92kDa gelatinase, 92kDa type IV collagenase)	9	1	1	0	0	0
PDE10A	ENST00000366882.1	phosphodiesterase 10A	371	7	4	2	1	1
MXD1	ENST00000264444.2	MAX dimerization protein 1	183	2	0	1	1	1
GAL3ST3	ENST00000312006.4	galactose-3-O-sulfotransferase 3	5	2	0	1	1	0
B4GALT4	ENST00000467604.1	UDP-Gal:betaGlcNAc beta 1,4- galactosyltransferase, polypeptide 4	196	1	1	0	0	3
SH3RF3	ENST00000309415.6	SH3 domain containing ring finger 3	15	3	1	1	1	1
SHOC2	ENST00000369452.4	soc-2 suppressor of clear homolog (C. elegans)	437	3	0	1	2	0
RORA	ENST00000335670.6	RAR-related orphan receptor A	102	4	1	2	1	1
ZFP90	ENST00000398253.2	ZFP90 zinc finger protein	174	3	2	1	0	0
PAX1	ENST00000444366.2	paired box 1	5	1	1	0	0	1
NPPC	ENST00000409852.1	natriuretic peptide C	9	1	0	1	0	0
TWIST1	ENST00000242261.5	twist basic helix-loop-helix transcription factor 1	190	7	5	1	1	0
CDON	ENST00000392693.3	cell adhesion associated, oncogene regulated	173	3	3	0	0	0
FABP2	ENST00000274024.3	fatty acid binding protein 2, intestinal	5	1	0	1	0	0
CLTB	ENST00000310418.4	clathrin, light chain B	3715	1	1	0	0	0
CYP2B6	ENST00000324071.4	cytochrome P450, family 2, subfamily B, polypeptide 6	5	3	1	2	0	1
ACVR2B	ENST00000352511.4	activin A receptor, type IIB	21	8	6	1	1	1
RGS2	ENST00000235382.5	regulator of G-protein signaling 2, 24kDa	321	1	1	0	0	0
NECAB1	ENST00000417640.2	N-terminal EF-hand calcium binding protein 1	5	1	1	0	0	0
KIAA1737	ENST00000361786.2	KIAA1737	57	3	0	2	1	0
ZFYVE27	ENST00000453958.2	zinc finger, FYVE domain containing 27	565	2	2	0	0	0
CHRM3	ENST00000255380.4	cholinergic receptor, muscarinic 3	47	8	6	1	1	1
RABGAP1	ENST00000373647.4	RAB GTPase activating protein 1	514	2	0	1	1	2
TPRG1L	ENST00000378344.2	tumor protein p63 regulated 1-like	203	2	1	0	1	0
SOHLH2	ENST00000379881.3	spermatogenesis and oogenesis specific basic helix-loop-helix 2	15	1	1	0	0	0
ST8SIA1	ENST00000396037.4	ST8 alpha-N-acetyl-neuraminide alpha-2,8-sialyltransferase 1	5	2	2	0	0	0
C19orf77	ENST00000591708.1	chromosome 19 open reading frame 77	9	1	0	1	0	0
SUOX	ENST00000356124.4	sulfite oxidase	120	1	1	0	0	0
NID1	ENST00000366595.3	nidogen 1	303	2	2	0	0	0
CLEC4A	ENST00000229332.5	C-type lectin domain family 4, member A	21	1	1	0	0	0
EBF1	ENST00000313708.6	early B-cell factor 1	42	3	0	2	1	0
SLC2A8	ENST00000373360.3	solute carrier family 2 (facilitated glucose transporter), member 8	324	1	1	0	0	0
C5orf51	ENST00000381647.2	chromosome 5 open reading frame 51	124	2	0	2	0	1
SLC46A1	ENST00000440501.1	solute carrier family 46 (folate transporter), member 1	580	3	2	1	0	1
TCAIM	ENST00000342649.4	T cell activation inhibitor, mitochondrial	844	1	1	0	0	0
SPATA12	ENST00000334325.1	spermatogenesis associated 12	7	2	0	2	0	0
PRKAR2A	ENST00000265563.8	protein kinase, cAMP-dependent, regulatory, type II, alpha	583	1	1	0	0	1
RNPC3	ENST00000533099.1	RNA-binding region (RNP1, RRM) containing 3	419	2	0	1	1	0
CREBBP	ENST00000262367.5	CREB binding protein	532	2*	1	0	0	1
CDK13	ENST00000181839.4	cyclin-dependent kinase 13	32	3	3	0	0	0
CPLX2	ENST00000359546.4	complexin 2	5	3	2	1	0	0
GJD2	ENST00000290374.4	gap junction protein, delta 2, 36kDa	5	1	1	0	0	0
SMAD9	ENST00000399275.2	SMAD family member 9	62	2	1	1	0	1
CXCL14	ENST00000337225.5	chemokine (C-X-C motif) ligand 14	5	2	0	1	1	0
PLA2G3	ENST00000215885.3	phospholipase A2, group III	5	2	0	0	2	0
PBX1	ENST00000367897.1	pre-B-cell leukemia homeobox 1	18	3	2	0	1	0
ATG12	ENST00000500945.2	autophagy related 12	1822	2	0	1	1	1
DCX	ENST00000356915.2	doublecortin	5	4	3	1	0	1
FZD7	ENST00000286201.1	frizzled family receptor 7	319	2	1	1	0	0
NDRG3	ENST00000373803.2	NDRG family member 3	960	2	1	1	0	0
RAB31	ENST00000578921.1	RAB31, member RAS oncogene family	726	2	1	1	0	0
GABRG2	ENST00000356592.3	gamma-aminobutyric acid (GABA) A receptor, gamma 2	24	1	1	0	0	0
SGCZ	ENST00000382080.1	sarcoglycan, zeta	5	1	1	0	0	1
FAM222A	ENST00000538780.1	family with sequence similarity 222, member A	23	2	1	1	0	1
PC	ENST00000529047.1	pyruvate carboxylase	798	1	1	0	0	0
TMEM132D	ENST00000389441.4	transmembrane protein 132D	5	1	1	0	0	1
CALM1	ENST00000356978.4	calmodulin 1 (phosphorylase kinase, delta)	4046	1	1	0	0	0
SLA2	ENST00000262866.4	Src-like-adaptor 2	5	1	1	0	0	1
TIGD6	ENST00000296736.3	tigger transposable element derived 6	155	1	1	0	0	0
PI15	ENST00000260113.2	peptidase inhibitor 15	12	2	1	0	1	1
PET100	ENST00000594797.1	PET100 homolog (S. cerevisiae)	5	1	0	1	0	0
SLC37A1	ENST00000398341.3	solute carrier family 37 (glucose-6-phosphate transporter), member 1	12	1	1	0	0	0
SRP9	ENST00000366838.1	signal recognition particle 9kDa	21	1	1	0	0	0
AL354808.2	ENST00000601204.1		5	1	0	0	1	0
BRWD3	ENST00000373275.4	bromodomain and WD repeat domain containing 3	506	3	2	0	1	4
HCK	ENST00000520553.1	hemopoietic cell kinase	5	1	1	0	0	0
FOXL1	ENST00000320241.3	forkhead box L1	367	2	1	0	1	0
KSR2	ENST00000425217.1	kinase suppressor of ras 2	22	6	4	1	1	2
PTPN14	ENST00000366956.5	protein tyrosine phosphatase, non-receptor type 14	301	2	1	0	1	1
CALHM1	ENST00000329905.5	calcium homeostasis modulator 1	5	1	1	0	0	1
MAPRE2	ENST00000436190.2	microtubule-associated protein, RP/EB family, member 2	361	2	1	0	1	1
ATG10	ENST00000282185.3	autophagy related 10	25	2	1	0	1	0
STXBP5L	ENST00000273666.6	syntaxin binding protein 5-like	19	7	5	2	0	0
TMEM144	ENST00000296529.6	transmembrane protein 144	131	1	1	0	0	0
DENND6A	ENST00000311128.5	DENN/MADD domain containing 6A	139	2	1	0	1	0
STXBP4	ENST00000376352.2	syntaxin binding protein 4	62	4	2	2	0	0
SEPT6	ENST00000394610.1	septin 6	1854	1	1	0	0	0
WARS	ENST00000392882.2	tryptophanyl-tRNA synthetase	1916	2	1	1	0	0
CA13	ENST00000321764.3	carbonic anhydrase XIII	42	1	1	0	0	0
ADCK5	ENST00000308860.6	aarF domain containing kinase 5	25	1	0	1	0	0
OR4C12	ENST00000335238.4	olfactory receptor, family 4, subfamily C, member 12	5	1	0	0	1	0
IRX6	ENST00000290552.7	iroquois homeobox 6	5	2	0	1	1	0
SUCLG2	ENST00000307227.5	succinate-CoA ligase, GDP-forming, beta subunit	88	1	1	0	0	0
LGI3	ENST00000306317.2	leucine-rich repeat LGI family, member 3	5	2	1	1	0	0
ERO1LB	ENST00000354619.5	ERO1-like beta (S. cerevisiae)	478	2	1	0	1	0
RHBDD1	ENST00000341329.3	rhomboid domain containing 1	667	3	2	1	0	0
KCNC1	ENST00000379472.3	potassium voltage-gated channel, Shaw-related subfamily, member 1	42	2	1	0	1	1
HTR2C	ENST00000371950.3	5-hydroxytryptamine (serotonin) receptor 2C, G protein-coupled	5	3	0	1	2	2
ALKBH1	ENST00000216489.3	alkB, alkylation repair homolog 1 (E. coli)	223	1	1	0	0	0
EIF4E3	ENST00000425534.3	eukaryotic translation initiation factor 4E family member 3	475	2	1	1	0	2
ACMSD	ENST00000356140.5	aminocarboxymuconate semialdehyde decarboxylase	19	1	0	0	1	0
TMPRSS11D	ENST00000283916.6	transmembrane protease, serine 11D	5	1	1	0	0	0
AVPR2	ENST00000370049.1	arginine vasopressin receptor 2	5	1	1	0	0	0
ACSL4	ENST00000469796.2	acyl-CoA synthetase long-chain family member 4	229	3	1	1	1	0
KRT222	ENST00000394052.3	keratin 222	9	3	2	1	0	0
KIF3A	ENST00000378746.4	kinesin family member 3A	33	2	1	1	0	0
MTMR7	ENST00000180173.5	myotubularin related protein 7	33	1	1	0	0	0
STEAP3	ENST00000409811.1	STEAP family member 3, metalloreductase	160	2	1	1	0	0
MRPS21	ENST00000309092.7	mitochondrial ribosomal protein S21	1121	1	0	1	0	0
LZIC	ENST00000377223.1	leucine zipper and CTNNBIP1 domain containing	508	3	3	0	0	0
PTGFR	ENST00000370756.3	prostaglandin F receptor (FP)	20	3	1	0	2	1
ECHDC2	ENST00000371522.4	enoyl CoA hydratase domain containing 2	172	2	0	2	0	0
BCAT1	ENST00000261192.7	branched chain amino-acid transaminase 1, cytosolic	1346	2	1	1	0	0
MBTD1	ENST00000586178.1	mbt domain containing 1	113	2	1	0	1	0
NLGN1	ENST00000457714.1	neuroligin 1	36	3	1	0	2	1
UNC5A	ENST00000261961.3	unc-5 homolog A (C. elegans)	7	2	1	0	1	0
SLC6A3	ENST00000270349.9	solute carrier family 6 (neurotransmitter transporter), member 3	5	2	0	2	0	0
ARL8B	ENST00000419534.2	ADP-ribosylation factor-like 8B	664	1	0	1	0	2
PROKR2	ENST00000546004.1	prokineticin receptor 2	5	1	0	1	0	0
SLC35G1	ENST00000371408.3	solute carrier family 35, member G1	227	1	1	0	0	0
FLOT2	ENST00000394906.2	flotillin 2	37	1	1	0	0	0
DSCAM	ENST00000400454.1	Down syndrome cell adhesion molecule	5	3	1	0	2	0
PANX2	ENST00000159647.5	pannexin 2	169	2	1	1	0	0
PLCB1	ENST00000378641.3	phospholipase C, beta 1 (phosphoinositide-specific)	21	3	2	1	0	1
POU2F2	ENST00000342301.4	POU class 2 homeobox 2	5	3	1	2	0	0
PXDC1	ENST00000380283.4	PX domain containing 1	1727	1	1	0	0	0
SLC48A1	ENST00000442218.2	solute carrier family 48 (heme transporter), member 1	470	1	1	0	0	1
CD300E	ENST00000392619.1	CD300e molecule	5	1	0	1	0	0
C21orf62	ENST00000536776.1	chromosome 21 open reading frame 62	5	1	1	0	0	0
RARA	ENST00000425707.3	retinoic acid receptor, alpha	560	6	6	0	0	0
GRM7	ENST00000486284.1	glutamate receptor, metabotropic 7	5	1	1	0	0	0
FSD2	ENST00000334574.8	fibronectin type III and SPRY domain containing 2	5	2	2	0	0	0
TRIM67	ENST00000444294.3	tripartite motif containing 67	41	3	1	1	1	0
LIMA1	ENST00000552491.1	LIM domain and actin binding 1	780	1	1	0	0	0
PITPNB	ENST00000335272.5	phosphatidylinositol transfer protein, beta	80	1	0	1	0	1
EIF1AX	ENST00000379607.5	eukaryotic translation initiation factor 1A, X-linked	277	2	0	0	2	1
RIMS2	ENST00000507740.1	regulating synaptic membrane exocytosis 2	8	4	4	0	0	1
UNC5D	ENST00000287272.2	unc-5 homolog D (C. elegans)	37	5	4	1	0	3
GFRA1	ENST00000439649.3	GDNF family receptor alpha 1	69	3	2	0	1	0
FRAT1	ENST00000371021.3	frequently rearranged in advanced T-cell lymphomas	631	1	1	0	0	0
APBA1	ENST00000265381.4	amyloid beta (A4) precursor protein-binding, family A, member 1	12	5	3	2	0	1
SYT10	ENST00000228567.3	synaptotagmin X	5	2	1	0	1	1
SLC26A9	ENST00000367135.3	solute carrier family 26 (anion exchanger), member 9	18	2	2	0	0	0
ANKRD49	ENST00000544253.1	ankyrin repeat domain 49	32	4	2	2	0	0
FAM171A1	ENST00000378116.4	family with sequence similarity 171, member A1	20	2	2	0	0	0
ANKRD34A	ENST00000323397.4	ankyrin repeat domain 34A	6	1	1	0	0	0
KIF5A	ENST00000455537.2	kinesin family member 5A	5	4	2	2	0	1
MT-ATP8	ENST00000361851.1	mitochondrially encoded ATP synthase 8	127	1	0	1	0	0
SPACA7	ENST00000283550.3	sperm acrosome associated 7	5	1	0	1	0	0
VSIG10L	ENST00000335624.4	V-set and immunoglobulin domain containing 10 like	6	1	1	0	0	0
TIRAP	ENST00000392679.1	toll-interleukin 1 receptor (TIR) domain containing adaptor protein	82	2	1	1	0	0
GPR173	ENST00000332582.4	G protein-coupled receptor 173	99	2	1	0	1	0
DLGAP4	ENST00000373913.3	discs, large (Drosophila) homolog-associated protein 4	1188	2	2	0	0	0
DIO2	ENST00000438257.4	deiodinase, iodothyronine, type II	98	3	1	1	1	4
GALNTL6	ENST00000506823.1	UDP-N-acetyl-alpha-D-galactosamine:polypeptide N-acetylgalactosaminyltransferase-like 6	26	1	1	0	0	0
CMIP	ENST00000537098.3	c-Maf inducing protein	2670	1	1	0	0	0
MYOCD	ENST00000425538.1	myocardin	62	5	0	1	4	0
AL354993.1	ENST00000439873.2	Cell growth-inhibiting protein 7; HCG1784586; Uncharacterized protein	9	2	2	0	0	0
IDH3B	ENST00000380843.4	isocitrate dehydrogenase 3 (NAD+) beta	4469	1	0	0	1	0
TIAF1	ENST00000408971.2	TGFB1-induced anti-apoptotic factor 1	152	2	0	2	0	0
FAM114A1	ENST00000358869.2	family with sequence similarity 114, member A1	1504	1	1	0	0	0
FAM129A	ENST00000367511.3	family with sequence similarity 129, member A	213	3	2	0	1	0
FAM13A	ENST00000395002.2	family with sequence similarity 13, member A	441	2	0	1	1	1
MSRB3	ENST00000308259.5	methionine sulfoxide reductase B3	83	5	4	0	1	1
CLASP1	ENST00000409078.3	cytoplasmic linker associated protein 1	210	2	0	0	2	0
MBTPS2	ENST00000379484.5	membrane-bound transcription factor peptidase, site 2	1711	1	1	0	0	0
ZNF180	ENST00000391956.4	zinc finger protein 180	195	1	1	0	0	0
TTPA	ENST00000260116.4	tocopherol (alpha) transfer protein	5	1	1	0	0	0
NIPAL3	ENST00000003912.3	NIPA-like domain containing 3	775	2	1	1	0	1
NHLRC3	ENST00000470258.1	NHL repeat containing 3	49	2	1	1	0	0
PMP2	ENST00000256103.2	peripheral myelin protein 2	5	1	1	0	0	0
IL1RN	ENST00000361779.3	interleukin 1 receptor antagonist	19	1	0	1	0	0
RAB11FIP2	ENST00000355624.3	RAB11 family interacting protein 2 (class I)	449	2	0	2	0	3
GRTP1	ENST00000375431.4	growth hormone regulated TBC protein 1	1279	1	0	1	0	0
WARS2	ENST00000369426.5	tryptophanyl tRNA synthetase 2, mitochondrial	205	2	0	1	1	0
CUL4A	ENST00000326335.4	cullin 4A	4084	1	1	0	0	0
C2orf73	ENST00000398634.2	chromosome 2 open reading frame 73	5	1	1	0	0	0
GATS	ENST00000436886.2	GATS, stromal antigen 3 opposite strand	86	1	0	0	1	1
PALB2	ENST00000261584.4	partner and localizer of BRCA2	65	1	0	1	0	0
ST8SIA4	ENST00000231461.5	ST8 alpha-N-acetyl-neuraminide alpha-2,8-sialyltransferase 4	5	3	1	1	1	0
C8B	ENST00000371237.4	complement component 8, beta polypeptide	19	1	0	1	0	0
ZNF804B	ENST00000333190.4	zinc finger protein 804B	0	2	0	0	2	0
CLN3	ENST00000535392.1	ceroid-lipofuscinosis, neuronal 3	5	1	0	1	0	0
GMFB	ENST00000554908.1	glia maturation factor, beta	15	2	2	0	0	0
TTC38	ENST00000381031.3	tetratricopeptide repeat domain 38	1352	1	1	0	0	0
NKAIN2	ENST00000368417.1	Na+/K+ transporting ATPase interacting 2	34	2	0	1	1	1
PTCHD1	ENST00000379361.4	patched domain containing 1	59	4*	1	0	2	0
GPRIN3	ENST00000609438.1	GPRIN family member 3	213	4	0	3	1	1
ABT1	ENST00000274849.1	activator of basal transcription 1	138	1	0	1	0	0
SPIN1	ENST00000375859.3	spindlin 1	686	1	1	0	0	1
HOXA13	ENST00000222753.4	homeobox A13	328	2	1	0	1	0
ACPP	ENST00000336375.5	acid phosphatase, prostate	22	2	0	1	1	0
ADAMTSL1	ENST00000380548.4	ADAMTS-like 1	38	3	1	1	1	0
FLVCR1	ENST00000366971.4	feline leukemia virus subgroup C cellular receptor 1	322	1	1	0	0	3
SCAMP1	ENST00000538629.1	secretory carrier membrane protein 1	816	13	8	2	3	2
TET2	ENST00000545826.1	tet methylcytosine dioxygenase 2	558	6	4	2	0	0
SNX29	ENST00000566228.1	sorting nexin 29	266	2	0	0	2	1
RASSF7	ENST00000397582.3	Ras association (RalGDS/AF-6) domain family (N-terminal) member 7	147	1	1	0	0	0
LRRC19	ENST00000380055.5	leucine rich repeat containing 19	5	1	1	0	0	0
MEGF8	ENST00000334370.4	multiple EGF-like-domains 8	28	3	1	0	2	0
SH2D4B	ENST00000339284.2	SH2 domain containing 4B	5	2	0	1	1	0
SRGN	ENST00000242465.3	serglycin	1156	1	0	1	0	0
RBMS3	ENST00000396583.3	RNA binding motif, single stranded interacting protein 3	56	3	1	0	2	0
ABHD17C	ENST00000258884.4	abhydrolase domain containing 17C	406	1	1	0	0	0
KANSL1L	ENST00000281772.9	KAT8 regulatory NSL complex subunit 1-like	5	1	1	0	0	1
USP33	ENST00000370794.3	ubiquitin specific peptidase 33	287	1	1	0	0	0
SRF	ENST00000265354.4	serum response factor (c-fos serum response element-binding transcription factor)	596	2	0	1	1	0
POU6F2	ENST00000518318.2	POU class 6 homeobox 2	5	3	3	0	0	0
RGMA	ENST00000557420.1	RGM domain family, member A	145	2	0	2	0	0
BCOR	ENST00000397354.3	BCL6 corepressor	355	1	1	0	0	0
ST8SIA3	ENST00000324000.3	ST8 alpha-N-acetyl-neuraminide alpha-2,8-sialyltransferase 3	5	3	1	1	1	0
ZFP36L1	ENST00000555997.1	ZFP36 ring finger protein-like 1	231	1	1	0	0	0
LIPE	ENST00000244289.4	lipase, hormone-sensitive	7	2	1	1	0	0
FOXN4	ENST00000355216.1	forkhead box N4	16	1	1	0	0	0
TDRP	ENST00000324079.6	testis development related protein	235	1	1	0	0	0
TRABD	ENST00000303434.4	TraB domain containing	2527	2	1	1	0	0
FAM163A	ENST00000341785.4	family with sequence similarity 163, member A	23	2	0	2	0	2
ELAVL4	ENST00000371824.1	ELAV like neuron-specific RNA binding protein 4	5	1	1	0	0	0
C4orf29	ENST00000388795.5	chromosome 4 open reading frame 29	67	5	4	1	0	1
NCOA7	ENST00000392477.2	nuclear receptor coactivator 7	2967	1	1	0	0	0
WDR72	ENST00000396328.1	WD repeat domain 72	77	3	1	1	1	0
DIAPH2	ENST00000324765.8	diaphanous-related formin 2	91	3	0	3	0	0
IGSF11	ENST00000425327.2	immunoglobulin superfamily, member 11	5	1	1	0	0	0
C1orf227	ENST00000332912.3	chromosome 1 open reading frame 227	5	1	0	0	1	0
KCNB1	ENST00000371741.4	potassium voltage-gated channel, Shab-related subfamily, member 1	5	4	3	0	1	1
MAPK4	ENST00000592595.1	mitogen-activated protein kinase 4	77	2	1	0	1	1
HFE	ENST00000357618.5	hemochromatosis	563	2	0	0	2	0
GOLPH3L	ENST00000271732.3	golgi phosphoprotein 3-like	274	1	1	0	0	0
CPLX3	ENST00000395018.4	complexin 3	5	1	1	0	0	1
MFSD4	ENST00000367147.4	major facilitator superfamily domain containing 4	5	3	0	3	0	0
DRP2	ENST00000402866.1	dystrophin related protein 2	5	2	1	0	1	0
C1orf233	ENST00000422725.1	chromosome 1 open reading frame 233	210	1	1	0	0	1
ITGAE	ENST00000263087.4	integrin, alpha E (antigen CD103, human mucosal lymphocyte antigen 1; alpha polypeptide)	683	1	0	1	0	0
TREM2	ENST00000373122.4	triggering receptor expressed on myeloid cells 2	5	1	0	1	0	0
RGS17	ENST00000367225.2	regulator of G-protein signaling 17	11	2	1	0	1	0
ST8SIA5	ENST00000315087.7	ST8 alpha-N-acetyl-neuraminide alpha-2,8-sialyltransferase 5	7	1	1	0	0	0
FKBP1B	ENST00000380991.4	FK506 binding protein 1B, 12.6 kDa	232	1	0	1	0	0
TMEM170B	ENST00000379426.1	transmembrane protein 170B	489	3	0	0	3	1
PNRC2	ENST00000334351.7	proline-rich nuclear receptor coactivator 2	100	1	0	0	1	1
NMRK2	ENST00000599576.1	nicotinamide riboside kinase 2	19	1	0	1	0	0
SARDH	ENST00000371872.4	sarcosine dehydrogenase	355	2	1	1	0	1
CRABP1	ENST00000299529.6	cellular retinoic acid binding protein 1	164	1	0	1	0	0
STK32A	ENST00000397936.3	serine/threonine kinase 32A	8	1	1	0	0	1
METAP1D	ENST00000315796.4	methionyl aminopeptidase type 1D (mitochondrial)	86	1	1	0	0	0
APLNR	ENST00000606794.1	apelin receptor	5	2	1	0	1	0
TMPRSS11BNL	ENST00000432593.3	TMPRSS11B N-terminal like	5	1	0	1	0	1
ZNF25	ENST00000302609.7	zinc finger protein 25	11	1	0	0	1	0
WDFY3	ENST00000322366.6	WD repeat and FYVE domain containing 3	596	1	1	0	0	2
RER1	ENST00000378512.1	RER1 retention in endoplasmic reticulum 1 homolog (S. cerevisiae)	2954	1	0	1	0	0
SLFNL1	ENST00000302946.8	schlafen-like 1	5	1	1	0	0	0
PDK3	ENST00000441463.2	pyruvate dehydrogenase kinase, isozyme 3	659	3	3	0	0	0
KCNA2	ENST00000485317.1	potassium voltage-gated channel, shaker-related subfamily, member 2	5	2	1	0	1	0
IGF1R	ENST00000268035.6	insulin-like growth factor 1 receptor	561	6	3	3	0	0
RHOBTB1	ENST00000337910.5	Rho-related BTB domain containing 1	229	3	3	0	0	0
ATP11A	ENST00000487903.1	ATPase, class VI, type 11A	731	8	5	2	1	0
FAM124A	ENST00000322475.8	family with sequence similarity 124A	5	1	0	0	1	1
ALPL	ENST00000374840.3	alkaline phosphatase, liver/bone/kidney	251	1	1	0	0	0
TMPRSS15	ENST00000284885.3	transmembrane protease, serine 15	5	1	1	0	0	0
MYL1	ENST00000341685.4	myosin, light chain 1, alkali; skeletal, fast	5	1	0	1	0	0
SLC26A11	ENST00000361193.3	solute carrier family 26 (anion exchanger), member 11	115	1	1	0	0	0
GATAD2B	ENST00000368655.4	GATA zinc finger domain containing 2B	48	4	4	0	0	0
ZSCAN29	ENST00000562072.1	zinc finger and SCAN domain containing 29	32	3	1	1	1	1
MS4A4A	ENST00000337908.4	membrane-spanning 4-domains, subfamily A, member 4A	5	1	0	1	0	0
AGBL2	ENST00000525123.1	ATP/GTP binding protein-like 2	7	2	0	1	1	0
TNPO3	ENST00000393245.1	transportin 3	30	3	1	2	0	0
TEX30	ENST00000376027.1	testis expressed 30	231	1	0	0	1	0
NR3C2	ENST00000344721.4	nuclear receptor subfamily 3, group C, member 2	425	2	1	0	1	1
ZIC1	ENST00000282928.4	Zic family member 1	26	1	0	1	0	0
RBPMS2	ENST00000560606.1	RNA binding protein with multiple splicing 2	34	1	0	1	0	0
SVIP	ENST00000354193.4	small VCP/p97-interacting protein	521	4	2	1	1	0
CELF2	ENST00000379261.4	CUGBP, Elav-like family member 2	45	3	1	2	0	1
BRE	ENST00000379632.2	brain and reproductive organ-expressed (TNFRSF1A modulator)	880	1	0	1	0	0
KIAA1598	ENST00000260777.10	KIAA1598	94	2	0	2	0	0
NIPSNAP1	ENST00000216121.7	nipsnap homolog 1 (C. elegans)	2429	1	0	1	0	0
BDP1	ENST00000380675.2	B double prime 1, subunit of RNA polymerase III transcription initiation factor IIIB	12	2	0	1	1	0
EDA2R	ENST00000374719.3	ectodysplasin A2 receptor	64	1	1	0	0	0
CHRNA4	ENST00000370263.4	cholinergic receptor, nicotinic, alpha 4 (neuronal)	5	2	0	1	1	0
GAD2	ENST00000376261.3	glutamate decarboxylase 2 (pancreatic islets and brain, 65kDa)	5	1	1	0	0	0
TMED7-TICAM2	ENST00000333314.3	TMED7-TICAM2 readthrough	202	2	0	1	1	0
C9orf96	ENST00000371957.3	chromosome 9 open reading frame 96	5	1	0	1	0	0
CBFB	ENST00000290858.6	core-binding factor, beta subunit	3904	1	0	1	0	0
PALM	ENST00000338448.5	paralemmin	341	2	0	2	0	0
ASTN1	ENST00000361833.2	astrotactin 1	9	5	1	3	1	0
C7orf26	ENST00000344417.5	chromosome 7 open reading frame 26	20	1	1	0	0	0
PIK3R1	ENST00000521381.1	phosphoinositide-3-kinase, regulatory subunit 1 (alpha)	217	2	0	0	2	2
NME7	ENST00000472647.1	NME/NM23 family member 7	8	1	0	1	0	0
POLH	ENST00000372226.1	polymerase (DNA directed), eta	450	2	1	0	1	1
CNTF	ENST00000361987.4	ciliary neurotrophic factor	46	2	0	0	2	1
PAPPA	ENST00000328252.3	pregnancy-associated plasma protein A, pappalysin 1	350	2	1	0	1	2
XK	ENST00000378616.3	X-linked Kx blood group (McLeod syndrome)	39	1	1	0	0	0
LRRC15	ENST00000347624.3	leucine rich repeat containing 15	12	2	1	1	0	1
ARL4A	ENST00000396663.1	ADP-ribosylation factor-like 4A	213	1	1	0	0	0
EFCAB14	ENST00000371933.3	EF-hand calcium binding domain 14	264	4	4	0	0	1
SFTPB	ENST00000519937.2	surfactant protein B	5	2	0	2	0	1
CXorf57	ENST00000372548.4	chromosome X open reading frame 57	409	1	1	0	0	0
RALB	ENST00000272519.5	v-ral simian leukemia viral oncogene homolog B	527	1	1	0	0	0
GPR50	ENST00000218316.3	G protein-coupled receptor 50	148	1	1	0	0	1
PAQR5	ENST00000395407.2	progestin and adipoQ receptor family member V	62	1	1	0	0	1
FAM72B	ENST00000369390.3	family with sequence similarity 72, member B	5	1	0	0	1	0
PRELP	ENST00000343110.2	proline/arginine-rich end leucine-rich repeat protein	5	1	1	0	0	1
CRB1	ENST00000367400.3	crumbs homolog 1 (Drosophila)	115	6	4	1	1	0
RBBP4	ENST00000373493.5	retinoblastoma binding protein 4	486	1	0	1	0	2
FAM72D	ENST00000400889.1	family with sequence similarity 72, member D	5	1	0	0	1	0
ZC3H18	ENST00000301011.5	zinc finger CCCH-type containing 18	15	1	1	0	0	0
PRKCA	ENST00000413366.3	protein kinase C, alpha	726	3	1	1	1	1
ETV6	ENST00000396373.4	ets variant 6	44	4	1	1	2	0
ZNF827	ENST00000379448.4	zinc finger protein 827	17	4	1	1	2	0
RBM46	ENST00000514866.1	RNA binding motif protein 46	5	1	0	1	0	0
HEPHL1	ENST00000315765.9	hephaestin-like 1	5	1	1	0	0	1
RGS4	ENST00000531057.1	regulator of G-protein signaling 4	489	2	1	0	1	0
ITGB3BP	ENST00000371092.3	integrin beta 3 binding protein (beta3-endonexin)	1136	2	1	1	0	0
DNAJC19	ENST00000486355.1	DnaJ (Hsp40) homolog, subfamily C, member 19	223	1	0	0	1	0
BRIP1	ENST00000259008.2	BRCA1 interacting protein C-terminal helicase 1	21	2	1	0	1	0
VDR	ENST00000395324.2	vitamin D (1,25- dihydroxyvitamin D3) receptor	416	1	1	0	0	0
GNG11	ENST00000248564.5	guanine nucleotide binding protein (G protein), gamma 11	10881	1	0	1	0	0
GTF3A	ENST00000381140.4	general transcription factor IIIA	1373	1	0	0	1	0
SPERT	ENST00000378966.3	spermatid associated	10	1	0	0	1	0
BCL2L10	ENST00000260442.3	BCL2-like 10 (apoptosis facilitator)	5	1	0	1	0	0
TMEM233	ENST00000426426.1	transmembrane protein 233	5	1	0	1	0	1
ZNF831	ENST00000371030.2	zinc finger protein 831	5	3	1	0	2	0
PRDM5	ENST00000515109.1	PR domain containing 5	22	1	0	0	1	1
LSAMP	ENST00000490035.2	limbic system-associated membrane protein	19	1	0	0	1	2
NEUROD1	ENST00000295108.3	neuronal differentiation 1	5	1	0	1	0	0
SHISA9	ENST00000558583.1	shisa family member 9	5	2	0	1	1	0
MOCS1	ENST00000373186.4	molybdenum cofactor synthesis 1	179	1	1	0	0	0
DIXDC1	ENST00000440460.2	DIX domain containing 1	307	2	0	1	1	0
FAM72A	ENST00000367128.3	family with sequence similarity 72, member A	5	1	0	0	1	0
SAP30L	ENST00000297109.6	SAP30-like	335	4	2	2	0	0
SAMD9L	ENST00000318238.4	sterile alpha motif domain containing 9-like	5	1	1	0	0	0
THY1	ENST00000284240.5	Thy-1 cell surface antigen	2345	1	1	0	0	0
LLGL2	ENST00000392550.3	lethal giant larvae homolog 2 (Drosophila)	149	1	0	1	0	0
COIL	ENST00000240316.4	coilin	5	1	1	0	0	0
FAM83F	ENST00000333407.6	family with sequence similarity 83, member F	5	2	0	1	1	2
YWHAH	ENST00000397492.1	tyrosine 3-monooxygenase/tryptophan 5-monooxygenase activation protein, eta polypeptide	7321	1	0	1	0	1
AOC1	ENST00000493429.1	amine oxidase, copper containing 1	5	1	0	0	1	0
PLEKHS1	ENST00000354462.3	pleckstrin homology domain containing, family S member 1	7	1	1	0	0	0
SLC17A5	ENST00000355773.5	solute carrier family 17 (acidic sugar transporter), member 5	166	3	1	1	1	0
NEBL	ENST00000377122.4	nebulette	181	6	1	3	2	2
DPH6	ENST00000256538.4	diphthamine biosynthesis 6	90	1	1	0	0	0
NOTCH2NL	ENST00000369340.3	notch 2 N-terminal like	5	2	1	0	1	0
ZKSCAN1	ENST00000324306.6	zinc finger with KRAB and SCAN domains 1	1314	2	1	0	1	0
SLC26A1	ENST00000361661.2	solute carrier family 26 (anion exchanger), member 1	241	1	1	0	0	0
ZNF558	ENST00000601372.1	zinc finger protein 558	24	1	1	0	0	0
GPBP1L1	ENST00000290795.3	GC-rich promoter binding protein 1-like 1	1737	1	1	0	0	0
LCK	ENST00000336890.5	lymphocyte-specific protein tyrosine kinase	23	2	0	1	1	0
SIGMAR1	ENST00000378892.1	sigma non-opioid intracellular receptor 1	591	1	0	0	1	1
SPCS2	ENST00000263672.6	signal peptidase complex subunit 2 homolog (S. cerevisiae)	28	1	1	0	0	1
TAX1BP3	ENST00000225525.3	Tax1 (human T-cell leukemia virus type I) binding protein 3	4402	1	0	1	0	0
CSAD	ENST00000267085.4	cysteine sulfinic acid decarboxylase	11	1	0	1	0	1
FUT6	ENST00000524754.1	fucosyltransferase 6 (alpha (1,3) fucosyltransferase)	45	1	0	1	0	0
EPHA4	ENST00000281821.2	EPH receptor A4	64	2	2	0	0	1
CCDC88C	ENST00000389857.6	coiled-coil domain containing 88C	42	2	1	1	0	0
PRRG1	ENST00000378628.4	proline rich Gla (G-carboxyglutamic acid) 1	1122	1	0	1	0	0
GEMIN7	ENST00000270257.4	gem (nuclear organelle) associated protein 7	329	1	0	1	0	0
UBE2Q1	ENST00000292211.4	ubiquitin-conjugating enzyme E2Q family member 1	3046	1	0	1	0	0
CCDC152	ENST00000361970.5	coiled-coil domain containing 152	5	1	0	1	0	0
SNW1	ENST00000261531.7	SNW domain containing 1	13	1	0	1	0	0
SH2B3	ENST00000341259.2	SH2B adaptor protein 3	89	1	1	0	0	0
NEK8	ENST00000268766.6	NIMA-related kinase 8	134	1	1	0	0	0
TSLP	ENST00000379706.4	thymic stromal lymphopoietin	62	2	0	2	0	0
TNFSF13B	ENST00000375887.4	tumor necrosis factor (ligand) superfamily, member 13b	5	1	0	1	0	0
TECTB	ENST00000369422.3	tectorin beta	5	1	0	1	0	1
C1orf226	ENST00000458626.2	chromosome 1 open reading frame 226	369	2	1	1	0	0
ZNF35	ENST00000396056.2	zinc finger protein 35	71	1	0	0	1	0
MYL5	ENST00000400159.2	myosin, light chain 5, regulatory	167	1	0	0	1	0
KSR1	ENST00000398988.3	kinase suppressor of ras 1	256	2	1	1	0	0
GPR116	ENST00000283296.7	G protein-coupled receptor 116	5	2	0	2	0	0
ZDHHC15	ENST00000373367.3	zinc finger, DHHC-type containing 15	5	2	0	0	2	0
TMTC1	ENST00000256062.5	transmembrane and tetratricopeptide repeat containing 1	379	3	0	2	1	0
CNGA2	ENST00000329903.4	cyclic nucleotide gated channel alpha 2	5	1	0	0	1	0
ST8SIA2	ENST00000268164.3	ST8 alpha-N-acetyl-neuraminide alpha-2,8-sialyltransferase 2	9	1	1	0	0	0
HYAL1	ENST00000395144.2	hyaluronoglucosaminidase 1	59	1	0	1	0	0
PSIP1	ENST00000380738.4	PC4 and SFRS1 interacting protein 1	377	1	1	0	0	1
MBLAC2	ENST00000316610.6	metallo-beta-lactamase domain containing 2	498	2	1	0	1	0
PLCE1	ENST00000371380.3	phospholipase C, epsilon 1	7	2	1	0	1	0
C7orf41	ENST00000324453.8	chromosome 7 open reading frame 41	235	2	0	1	1	0
ZNF384	ENST00000319770.3	zinc finger protein 384	8	1	1	0	0	0
BBS1	ENST00000393994.2	Bardet-Biedl syndrome 1	523	1	0	1	0	0
SEPT11	ENST00000264893.6	septin 11	515	3	0	3	0	0
FAM149B1	ENST00000242505.6	family with sequence similarity 149, member B1	33	1	0	0	1	0
TBC1D2	ENST00000375064.1	TBC1 domain family, member 2	873	1	1	0	0	0
PAX6	ENST00000419022.1	paired box 6	191	1	0	1	0	2
ANO1	ENST00000355303.5	anoctamin 1, calcium activated chloride channel	78	1	1	0	0	2
PHB	ENST00000300408.3	prohibitin	759	1	1	0	0	0
NCF2	ENST00000367536.1	neutrophil cytosolic factor 2	12	1	0	0	1	1
ZFYVE20	ENST00000253699.3	zinc finger, FYVE domain containing 20	57	1	1	0	0	0
SERPINB10	ENST00000238508.3	serpin peptidase inhibitor, clade B (ovalbumin), member 10	5	1	0	0	1	0
ZNF544	ENST00000599227.1	zinc finger protein 544	173	1	0	0	1	0
NRK	ENST00000243300.9	Nik related kinase	5	2	1	1	0	1
C19orf80	ENST00000252453.8	chromosome 19 open reading frame 80	5	1	0	1	0	0
C5orf20	ENST00000503143.2	chromosome 5 open reading frame 20	5	1	0	0	1	2
KIAA0355	ENST00000299505.6	KIAA0355	538	2	1	0	1	1
FIGN	ENST00000333129.3	fidgetin	10	2	1	0	1	1
MSTN	ENST00000260950.4	myostatin	6	1	1	0	0	0
CTD-3074O7.11	ENST00000419755.3	Bardet-Biedl syndrome 1 protein	523	1	0	1	0	0
ASXL3	ENST00000269197.5	additional sex combs like 3 (Drosophila)	65	2	2	0	0	0
MAB21L3	ENST00000369500.3	mab-21-like 3 (C. elegans)	5	1	1	0	0	0
DIRAS2	ENST00000375765.3	DIRAS family, GTP-binding RAS-like 2	5	2	0	2	0	1
TLK2	ENST00000582809.1	tousled-like kinase 2	5	1	1	0	0	0
MPP6	ENST00000222644.5	membrane protein, palmitoylated 6 (MAGUK p55 subfamily member 6)	389	3	2	1	0	2
HLA-DQA1	ENST00000343139.5	major histocompatibility complex, class II, DQ alpha 1	7	1	0	1	0	0
VWC2L	ENST00000427124.1	von Willebrand factor C domain containing protein 2-like	5	2	0	0	2	0
HOXC6	ENST00000243108.4	homeobox C6	63	1	0	1	0	0
SPINT1	ENST00000344051.4	serine peptidase inhibitor, Kunitz type 1	1591	2	0	2	0	0
OXTR	ENST00000316793.3	oxytocin receptor	24	2	1	1	0	0
PPFIA2	ENST00000549396.1	protein tyrosine phosphatase, receptor type, f polypeptide (PTPRF), interacting protein (liprin), alpha 2	5	1	1	0	0	0
SLC22A4	ENST00000200652.3	solute carrier family 22 (organic cation/zwitterion transporter), member 4	53	1	0	0	1	0
XRCC1	ENST00000262887.5	X-ray repair complementing defective repair in Chinese hamster cells 1	137	1	0	0	1	0
IFNGR1	ENST00000367739.4	interferon gamma receptor 1	8	1	0	1	0	0
TMEM133	ENST00000303130.2	transmembrane protein 133	543	1	0	1	0	0
PLA2G2C	ENST00000429261.2	phospholipase A2, group IIC	5	1	0	0	1	0
POLR3B	ENST00000228347.4	polymerase (RNA) III (DNA directed) polypeptide B	96	1	1	0	0	0
C18orf63	ENST00000579455.1	chromosome 18 open reading frame 63	5	1	1	0	0	0
FMOD	ENST00000354955.4	fibromodulin	207	1	0	1	0	2
OSR2	ENST00000435298.2	odd-skipped related 2 (Drosophila)	184	1	0	1	0	0
RBM48	ENST00000481551.1	RNA binding motif protein 48	220	1	0	0	1	0
PAPPA2	ENST00000367662.3	pappalysin 2	5	5	3	1	1	0
TMC2	ENST00000358864.1	transmembrane channel-like 2	5	9	6	2	1	0
STC2	ENST00000265087.4	stanniocalcin 2	1112	2	1	0	1	0
ZNF655	ENST00000425063.1	zinc finger protein 655	709	1	0	0	1	1
ACER2	ENST00000340967.2	alkaline ceramidase 2	44	2	1	0	1	0
ING3	ENST00000445699.1	inhibitor of growth family, member 3	339	1	0	1	0	0
TUBGCP3	ENST00000261965.3	tubulin, gamma complex associated protein 3	22	2	0	1	1	0
RECQL5	ENST00000423245.2	RecQ protein-like 5	129	1	1	0	0	0
TNRC6C	ENST00000335749.4	trinucleotide repeat containing 6C	248	2	1	1	0	0
FAM132B	ENST00000546354.1	family with sequence similarity 132, member B	722	2	0	2	0	0
RNF151	ENST00000569210.2	ring finger protein 151	5	1	0	1	0	0
TUSC5	ENST00000333813.3	tumor suppressor candidate 5	5	1	0	1	0	0
WIZ	ENST00000389282.4	widely interspaced zinc finger motifs	1321	1	1	0	0	0
CTD-2207O23.12	ENST00000599312.1	Uncharacterized protein	32	1	1	0	0	0
TAC4	ENST00000352793.2	tachykinin 4 (hemokinin)	5	1	0	0	1	0
SNCG	ENST00000348795.4	synuclein, gamma (breast cancer-specific protein 1)	375	1	0	1	0	0
KLF16	ENST00000250916.4	Kruppel-like factor 16	5	2	1	1	0	0
NEK7	ENST00000367385.4	NIMA-related kinase 7	12	1	1	0	0	0
BGN	ENST00000331595.4	biglycan	174	1	1	0	0	0
CARD11	ENST00000396946.4	caspase recruitment domain family, member 11	13	1	0	0	1	1
SEC14L4	ENST00000381982.3	SEC14-like 4 (S. cerevisiae)	5	2	0	1	1	0
ATRN	ENST00000262919.5	attractin	39	2	0	1	1	1
C20orf196	ENST00000303142.6	chromosome 20 open reading frame 196	18	1	1	0	0	0
WDR45B	ENST00000392325.4	WD repeat domain 45B	962	1	0	1	0	1
FGF11	ENST00000293829.4	fibroblast growth factor 11	10	1	1	0	0	0
IZUMO3	ENST00000543880.2	IZUMO family member 3	5	1	0	0	1	0
UBR1	ENST00000382177.2	ubiquitin protein ligase E3 component n-recognin 1	11	1	1	0	0	0
ZSWIM6	ENST00000252744.5	zinc finger, SWIM-type containing 6	933	2	0	0	2	0
NPHS1	ENST00000378910.5	nephrosis 1, congenital, Finnish type (nephrin)	5	1	0	0	1	0
DLGAP2	ENST00000421627.2	discs, large (Drosophila) homolog-associated protein 2	5	5	4	1	0	5
MTHFSD	ENST00000360900.6	methenyltetrahydrofolate synthetase domain containing	149	1	0	0	1	0
MASP1	ENST00000296280.6	mannan-binding lectin serine peptidase 1 (C4/C2 activating component of Ra-reactive factor)	838	1	0	1	0	1
LIN7A	ENST00000552864.1	lin-7 homolog A (C. elegans)	86	4	2	1	1	0
PHF1	ENST00000374512.3	PHD finger protein 1	19	1	0	1	0	0
OR5A1	ENST00000302030.2	olfactory receptor, family 5, subfamily A, member 1	5	1	0	1	0	0
WNT10A	ENST00000258411.3	wingless-type MMTV integration site family, member 10A	5	1	0	0	1	0
ROPN1	ENST00000184183.4	rhophilin associated tail protein 1	5	1	0	1	0	0
ATRNL1	ENST00000355044.3	attractin-like 1	26	2	0	2	0	0
TLDC2	ENST00000217320.3	TBC/LysM-associated domain containing 2	5	1	1	0	0	0
ZNF467	ENST00000302017.3	zinc finger protein 467	11	1	0	0	1	0
RALGAPA2	ENST00000202677.7	Ral GTPase activating protein, alpha subunit 2 (catalytic)	24	4	3	1	0	1
PTPRE	ENST00000254667.3	protein tyrosine phosphatase, receptor type, E	44	7	6	1	0	0
RGS16	ENST00000367558.5	regulator of G-protein signaling 16	7	1	1	0	0	0
KPNB1	ENST00000290158.4	karyopherin (importin) beta 1	465	2	0	1	1	0
SCRT2	ENST00000246104.6	scratch homolog 2, zinc finger protein (Drosophila)	5	2	0	2	0	0
DUSP14	ENST00000394389.4	dual specificity phosphatase 14	6641	1	0	1	0	0
TIGIT	ENST00000486257.1	T cell immunoreceptor with Ig and ITIM domains	5	1	0	1	0	1
AC137932.1	ENST00000602042.1		5	1	0	0	1	0
MVB12B	ENST00000361171.3	multivesicular body subunit 12B	29	3	1	2	0	0
TMEM140	ENST00000275767.3	transmembrane protein 140	858	1	0	1	0	0
CCNY	ENST00000374706.1	cyclin Y	672	3	1	0	2	1
SVOPL	ENST00000288513.5	SVOP-like	5	1	0	1	0	0
FBF1	ENST00000586717.1	Fas (TNFRSF6) binding factor 1	86	1	1	0	0	0
PIGU	ENST00000452740.2	phosphatidylinositol glycan anchor biosynthesis, class U	355	1	0	1	0	0
C19orf73	ENST00000408991.2	chromosome 19 open reading frame 73	40	1	0	0	1	0
AC026703.1	ENST00000326958.1		182	1	1	0	0	0
THSD7B	ENST00000409968.1	thrombospondin, type I, domain containing 7B	5	1	1	0	0	0
ANKRD40	ENST00000285243.6	ankyrin repeat domain 40	409	1	1	0	0	0
KANK4	ENST00000317477.4	KN motif and ankyrin repeat domains 4	80	1	0	1	0	0
ATP8A2	ENST00000381655.2	ATPase, aminophospholipid transporter, class I, type 8A, member 2	22	6	5	1	0	1
ZFP91	ENST00000316059.6	ZFP91 zinc finger protein	688	2	0	1	1	0
DPF3	ENST00000541685.1	D4, zinc and double PHD fingers, family 3	5	1	0	1	0	1
FAM65A	ENST00000428437.2	family with sequence similarity 65, member A	36	1	1	0	0	0
MDM4	ENST00000391947.2	Mdm4 p53 binding protein homolog (mouse)	443	1	1	0	0	0
TRABD2B	ENST00000606738.2	TraB domain containing 2B	244	3	1	0	2	0
MIB1	ENST00000261537.6	mindbomb E3 ubiquitin protein ligase 1	897	2	1	0	1	0
EREG	ENST00000244869.2	epiregulin	5	2	0	2	0	0
F2RL2	ENST00000296641.4	coagulation factor II (thrombin) receptor-like 2	5	2	0	1	1	0
PDZD2	ENST00000438447.1	PDZ domain containing 2	5	1	1	0	0	0
RAPGEFL1	ENST00000264644.6	Rap guanine nucleotide exchange factor (GEF)-like 1	20	1	1	0	0	0
CCDC169-SOHLH2	ENST00000511166.1	CCDC169-SOHLH2 readthrough	15	1	1	0	0	0
CAPN6	ENST00000324068.1	calpain 6	5	2	0	2	0	1
MYOZ3	ENST00000297130.4	myozenin 3	8	1	0	1	0	0
PAPSS1	ENST00000265174.4	3'-phosphoadenosine 5'-phosphosulfate synthase 1	75	1	0	0	1	1
UBXN4	ENST00000272638.9	UBX domain protein 4	3678	1	1	0	0	0
AGO3	ENST00000373191.4	argonaute RISC catalytic component 3	198	4	1	1	2	1
VAT1L	ENST00000302536.2	vesicle amine transport 1-like	123	2	0	1	1	0
CTRC	ENST00000375943.2	chymotrypsin C (caldecrin)	5	1	0	1	0	0
RAB3A	ENST00000222256.4	RAB3A, member RAS oncogene family	10	1	0	0	1	0
CDCA7L	ENST00000356195.5	cell division cycle associated 7-like	292	1	0	1	0	0
CMPK1	ENST00000371873.5	cytidine monophosphate (UMP-CMP) kinase 1, cytosolic	4366	1	0	1	0	0
FAR1	ENST00000354817.3	fatty acyl CoA reductase 1	814	1	0	1	0	2
EPN3	ENST00000268933.3	epsin 3	5	1	1	0	0	0
CD97	ENST00000357355.3	CD97 molecule	1041	1	0	0	1	0
POLE3	ENST00000374169.3	polymerase (DNA directed), epsilon 3, accessory subunit	243	1	0	1	0	0
SPRY3	ENST00000302805.2	sprouty homolog 3 (Drosophila)	5	3	0	1	2	0
PGAP1	ENST00000354764.4	post-GPI attachment to proteins 1	106	3	0	1	2	1
CHD1L	ENST00000369258.4	chromodomain helicase DNA binding protein 1-like	713	1	0	0	1	0
STARD8	ENST00000252336.6	StAR-related lipid transfer (START) domain containing 8	29	1	1	0	0	1
EEA1	ENST00000322349.8	early endosome antigen 1	78	2	0	1	1	1
ZSCAN31	ENST00000439158.1	zinc finger and SCAN domain containing 31	43	1	0	0	1	0
NARF	ENST00000309794.11	nuclear prelamin A recognition factor	610	1	1	0	0	0
NOX5	ENST00000260364.5	NADPH oxidase, EF-hand calcium binding domain 5	5	1	0	0	1	0
CTNS	ENST00000046640.3	cystinosin, lysosomal cystine transporter	308	1	1	0	0	0
DNAJC6	ENST00000395325.3	DnaJ (Hsp40) homolog, subfamily C, member 6	96	1	1	0	0	1
CTBS	ENST00000370630.5	chitobiase, di-N-acetyl-	33	2	0	0	2	0
FAM126B	ENST00000418596.3	family with sequence similarity 126, member B	132	2	1	1	0	0
CABP5	ENST00000293255.2	calcium binding protein 5	5	1	0	0	1	0
DKFZP434E1119	ENST00000598970.1		5	1	0	1	0	1
DTX1	ENST00000257600.3	deltex homolog 1 (Drosophila)	10	1	1	0	0	0
F2R	ENST00000319211.4	coagulation factor II (thrombin) receptor	1104	1	0	1	0	2
ELFN2	ENST00000402918.2	extracellular leucine-rich repeat and fibronectin type III domain containing 2	22	3	0	3	0	0
MDM1	ENST00000540418.1	Mdm1 nuclear protein homolog (mouse)	146	1	0	1	0	0
PLEKHG2	ENST00000425673.1	pleckstrin homology domain containing, family G (with RhoGef domain) member 2	399	4	2	2	0	1
CCDC97	ENST00000269967.3	coiled-coil domain containing 97	85	2	1	0	1	1
CNTNAP5	ENST00000431078.1	contactin associated protein-like 5	5	3	0	0	3	3
PLCXD2	ENST00000477665.1	phosphatidylinositol-specific phospholipase C, X domain containing 2	5	1	0	0	1	0
HLA-DQA2	ENST00000374940.3	major histocompatibility complex, class II, DQ alpha 2	5	1	0	1	0	0
NHSL1	ENST00000427025.2	NHS-like 1	393	1	0	1	0	1
AFF2	ENST00000370460.2	AF4/FMR2 family, member 2	8	4	2	0	2	4
STEAP2	ENST00000287908.3	STEAP family member 2, metalloreductase	266	2	0	1	1	0
GPN3	ENST00000228827.3	GPN-loop GTPase 3	1825	1	0	1	0	0
EPAS1	ENST00000263734.3	endothelial PAS domain protein 1	3689	2	1	1	0	0
SPRYD4	ENST00000338146.5	SPRY domain containing 4	1999	1	0	1	0	0
FNDC7	ENST00000271311.2	fibronectin type III domain containing 7	5	1	1	0	0	1
CCR3	ENST00000545097.1	chemokine (C-C motif) receptor 3	5	1	0	0	1	0
ARPP21	ENST00000187397.4	cAMP-regulated phosphoprotein, 21kDa	5	1	0	0	1	0
HAGHL	ENST00000549114.1	hydroxyacylglutathione hydrolase-like	102	2	0	1	1	0
WDR78	ENST00000371026.3	WD repeat domain 78	10	3	3	0	0	0
C15orf57	ENST00000358005.3	chromosome 15 open reading frame 57	79	1	0	1	0	0
CLIC4	ENST00000374379.4	chloride intracellular channel 4	226	1	0	0	1	1
SLC16A6	ENST00000327268.4	solute carrier family 16, member 6	17	1	1	0	0	0
RRAD	ENST00000420652.1	Ras-related associated with diabetes	28	1	0	1	0	0
COPZ1	ENST00000551779.1	coatomer protein complex, subunit zeta 1	2623	1	0	1	0	0
ARIH1	ENST00000379887.4	ariadne RBR E3 ubiquitin protein ligase 1	671	3	1	0	2	3
CNOT7	ENST00000361272.4	CCR4-NOT transcription complex, subunit 7	415	2	0	0	2	0
TENM2	ENST00000519204.1	teneurin transmembrane protein 2	162	1	1	0	0	0
PIP5K1B	ENST00000265382.3	phosphatidylinositol-4-phosphate 5-kinase, type I, beta	69	1	1	0	0	0
LRRC7	ENST00000310961.5	leucine rich repeat containing 7	18	1	1	0	0	0
CPNE5	ENST00000244751.2	copine V	13	1	1	0	0	0
TAS1R3	ENST00000339381.5	taste receptor, type 1, member 3	7	1	1	0	0	0
EFNA3	ENST00000505139.1	Ephrin-A3; Uncharacterized protein; cDNA FLJ57652, highly similar to Ephrin-A3	9	1	0	1	0	0
TRAT1	ENST00000295756.6	T cell receptor associated transmembrane adaptor 1	5	1	0	0	1	0
AMICA1	ENST00000356289.5	adhesion molecule, interacts with CXADR antigen 1	87	1	0	0	1	0
CNKSR1	ENST00000361530.6	connector enhancer of kinase suppressor of Ras 1	19	1	0	1	0	0
FOXG1	ENST00000382535.3	forkhead box G1	40	4	2	0	2	0
ZNF764	ENST00000252797.2	zinc finger protein 764	59	1	0	1	0	0
HOXD4	ENST00000306324.3	homeobox D4	214	1	1	0	0	0
LIMD1	ENST00000273317.4	LIM domains containing 1	1092	1	1	0	0	0
SETDB2	ENST00000354234.4	SET domain, bifurcated 2	70	1	1	0	0	0
SV2B	ENST00000394232.1	synaptic vesicle glycoprotein 2B	7	2	2	0	0	0
TMEM38A	ENST00000187762.2	transmembrane protein 38A	158	1	0	0	1	0
SV2A	ENST00000369146.3	synaptic vesicle glycoprotein 2A	10	1	1	0	0	0
FAM49A	ENST00000381323.3	family with sequence similarity 49, member A	38	1	1	0	0	0
SV2C	ENST00000502798.2	synaptic vesicle glycoprotein 2C	30	3	2	0	1	2
ANAPC13	ENST00000510994.1	anaphase promoting complex subunit 13	443	1	0	1	0	0
OSMR	ENST00000274276.3	oncostatin M receptor	2781	1	0	1	0	1
MYLK2	ENST00000375994.2	myosin light chain kinase 2	16	2	0	1	1	0
NME8	ENST00000199447.4	NME/NM23 family member 8	5	1	0	0	1	0
AKAP10	ENST00000225737.6	A kinase (PRKA) anchor protein 10	700	2	0	0	2	1
CYP2A6	ENST00000301141.5	cytochrome P450, family 2, subfamily A, polypeptide 6	5	1	0	0	1	0
SRSF3	ENST00000373715.6	serine/arginine-rich splicing factor 3	2593	1	0	0	1	0
RSF1	ENST00000308488.6	remodeling and spacing factor 1	216	5	1	1	3	0
GRAPL	ENST00000344415.4	GRB2-related adaptor protein-like	5	1	0	1	0	0
KMO	ENST00000366559.4	kynurenine 3-monooxygenase (kynurenine 3-hydroxylase)	5	2	0	0	2	0
MRPS27	ENST00000261413.5	mitochondrial ribosomal protein S27	1137	1	1	0	0	0
SLC52A2	ENST00000526752.1	solute carrier family 52 (riboflavin transporter), member 2	483	1	0	0	1	0
SPNS2	ENST00000329078.3	spinster homolog 2 (Drosophila)	7	2	1	1	0	1
LEP	ENST00000308868.4	leptin	5	1	1	0	0	0
NUDT5	ENST00000491614.1	nudix (nucleoside diphosphate linked moiety X)-type motif 5	808	2	0	1	1	0
TMEM129	ENST00000303277.2	transmembrane protein 129	57	1	0	1	0	0
TIFAB	ENST00000537858.1	TRAF-interacting protein with forkhead-associated domain, family member B	5	2	0	0	2	2
CYP2A13	ENST00000330436.3	cytochrome P450, family 2, subfamily A, polypeptide 13	5	1	0	0	1	0
CYP2C9	ENST00000260682.6	cytochrome P450, family 2, subfamily C, polypeptide 9	5	1	0	0	1	0
RAG1	ENST00000299440.5	recombination activating gene 1	5	1	0	1	0	0
ERVMER34-1	ENST00000443173.1	endogenous retrovirus group MER34, member 1	28	1	1	0	0	0
CDKL3	ENST00000521755.1	cyclin-dependent kinase-like 3	21	1	0	0	1	0
HSD3B1	ENST00000235547.6	hydroxy-delta-5-steroid dehydrogenase, 3 beta- and steroid delta-isomerase 1	5	1	0	1	0	0
EFNB2	ENST00000245323.4	ephrin-B2	25	1	0	0	1	1
CCND3	ENST00000372991.4	cyclin D3	271	1	0	1	0	0
REEP3	ENST00000373758.4	receptor accessory protein 3	1095	2	1	1	0	1
PYGO1	ENST00000302000.6	pygopus homolog 1 (Drosophila)	104	3	1	1	1	0
TMEM176B	ENST00000492607.1	transmembrane protein 176B	994	1	0	1	0	0
CARD6	ENST00000254691.5	caspase recruitment domain family, member 6	285	1	0	0	1	0
STK32B	ENST00000282908.5	serine/threonine kinase 32B	196	1	1	0	0	0
ZFHX3	ENST00000268489.5	zinc finger homeobox 3	57	5	3	2	0	1
RAPGEF5	ENST00000401957.2	Rap guanine nucleotide exchange factor (GEF) 5	32	3	1	2	0	1
COL17A1	ENST00000353479.5	collagen, type XVII, alpha 1	5	2	0	1	1	0
NAV3	ENST00000228327.6	neuron navigator 3	277	1	0	0	1	2
BAG5	ENST00000299204.4	BCL2-associated athanogene 5	267	2	0	0	2	0
EFNB1	ENST00000204961.4	ephrin-B1	386	1	1	0	0	0
HIST1H2BC	ENST00000314332.5	histone cluster 1, H2bc	13	1	0	0	1	0
FBXO30	ENST00000237281.4	F-box protein 30	224	2	1	0	1	0
SLC25A11	ENST00000225665.7	solute carrier family 25 (mitochondrial carrier; oxoglutarate carrier), member 11	1867	1	0	1	0	0
PGM2L1	ENST00000298198.4	phosphoglucomutase 2-like 1	183	1	0	1	0	2
CAMK1D	ENST00000378847.3	calcium/calmodulin-dependent protein kinase ID	258	6	4	2	0	0
TXNDC5	ENST00000539054.1	thioredoxin domain containing 5 (endoplasmic reticulum)	1190	2	0	1	1	1
KIAA1456	ENST00000524591.2	KIAA1456	24	2	0	2	0	1
CORO1C	ENST00000261401.3	coronin, actin binding protein, 1C	1970	2	0	2	0	0
HSF5	ENST00000323777.3	heat shock transcription factor family member 5	5	3	1	2	0	1
GMNC	ENST00000442080.1	geminin coiled-coil domain containing	19	2	0	0	2	0
FAM83H	ENST00000388913.3	family with sequence similarity 83, member H	39	2	1	0	1	1
FAM118A	ENST00000216214.3	family with sequence similarity 118, member A	202	1	0	1	0	1
FAR2	ENST00000536681.3	fatty acyl CoA reductase 2	193	1	0	1	0	1
FHL5	ENST00000541107.1	four and a half LIM domains 5	5	1	0	0	1	0
C17orf59	ENST00000389017.4	chromosome 17 open reading frame 59	664	2	0	2	0	0
MYRIP	ENST00000302541.6	myosin VIIA and Rab interacting protein	9	1	0	1	0	0
ARHGEF17	ENST00000263674.3	Rho guanine nucleotide exchange factor (GEF) 17	729	2	0	1	1	1
PRDM4	ENST00000228437.5	PR domain containing 4	44	1	0	0	1	0
ERC2	ENST00000288221.6	ELKS/RAB6-interacting/CAST family member 2	11	2	1	1	0	0
LZTFL1	ENST00000539217.1	leucine zipper transcription factor-like 1	593	1	0	1	0	0
ZIC5	ENST00000267294.4	Zic family member 5	263	1	0	1	0	0
CCDC113	ENST00000443128.2	coiled-coil domain containing 113	29	4	1	1	2	1
ZEB2	ENST00000558170.2	zinc finger E-box binding homeobox 2	33	5	4	1	0	1
C3orf18	ENST00000426034.1	chromosome 3 open reading frame 18	29	1	1	0	0	0
FAM13C	ENST00000373867.3	family with sequence similarity 13, member C	343	1	0	1	0	0
CDK14	ENST00000380050.3	cyclin-dependent kinase 14	226	1	0	1	0	0
FAM172A	ENST00000395965.3	family with sequence similarity 172, member A	257	2	0	1	1	0
EGLN2	ENST00000593726.1	egl-9 family hypoxia-inducible factor 2	19	1	0	1	0	0
HIPK2	ENST00000406875.3	homeodomain interacting protein kinase 2	48	8	7	1	0	2
SOGA3	ENST00000556132.1	SOGA family member 3	95	4	2	1	1	0
GP5	ENST00000401815.1	glycoprotein V (platelet)	5	2	0	0	2	0
ELMOD1	ENST00000265840.7	ELMO/CED-12 domain containing 1	24	1	0	1	0	0
SPR	ENST00000234454.5	sepiapterin reductase (7,8-dihydrobiopterin:NADP+ oxidoreductase)	554	1	0	0	1	0
NOSTRIN	ENST00000317647.7	nitric oxide synthase trafficking	5	1	0	0	1	0
FAM20A	ENST00000592554.1	family with sequence similarity 20, member A	198	1	0	0	1	0
SEC11A	ENST00000560266.1	SEC11 homolog A (S. cerevisiae)	9118	1	0	1	0	0
RASD2	ENST00000216127.4	RASD family, member 2	10	1	0	1	0	1
ESRP1	ENST00000358397.5	epithelial splicing regulatory protein 1	74	2	1	1	0	0
PAFAH2	ENST00000374282.3	platelet-activating factor acetylhydrolase 2, 40kDa	287	1	1	0	0	0
LDLRAD3	ENST00000315571.5	low density lipoprotein receptor class A domain containing 3	90	1	1	0	0	0
PDGFC	ENST00000502773.1	platelet derived growth factor C	238	1	0	1	0	0
SH2D3C	ENST00000373277.4	SH2 domain containing 3C	5	1	0	1	0	0
CNTN3	ENST00000263665.6	contactin 3 (plasmacytoma associated)	27	8	6	0	2	1
KIF1A	ENST00000320389.7	kinesin family member 1A	115	5	4	0	1	1
CCR4	ENST00000330953.5	chemokine (C-C motif) receptor 4	5	1	0	1	0	0
ADAMTS3	ENST00000286657.4	ADAM metallopeptidase with thrombospondin type 1 motif, 3	5	1	1	0	0	0
RUNX1	ENST00000344691.4	runt-related transcription factor 1	182	3	3	0	0	2
C12orf49	ENST00000261318.3	chromosome 12 open reading frame 49	673	1	0	1	0	1
ZNF704	ENST00000327835.3	zinc finger protein 704	124	4	1	1	2	0
UFM1	ENST00000239878.4	ubiquitin-fold modifier 1	1502	1	0	0	1	0
GSC	ENST00000238558.3	goosecoid homeobox	5	1	0	1	0	0
METTL21B	ENST00000333012.5	methyltransferase like 21B	51	1	1	0	0	0
RUNX3	ENST00000399916.1	runt-related transcription factor 3	378	1	1	0	0	1
NFASC	ENST00000401399.1	neurofascin	10	7	3	2	2	0
S100B	ENST00000291700.4	S100 calcium binding protein B	5	1	0	0	1	0
CCDC51	ENST00000447018.1	coiled-coil domain containing 51	738	1	0	0	1	0
NF2	ENST00000347330.5	neurofibromin 2 (merlin)	828	1	0	1	0	0
PLCG1	ENST00000244007.3	phospholipase C, gamma 1	69	3	2	0	1	0
SGK223	ENST00000330777.4	Tyrosine-protein kinase SgK223	159	1	0	1	0	0
GJA1	ENST00000282561.3	gap junction protein, alpha 1, 43kDa	1732	1	0	1	0	0
CSDC2	ENST00000306149.7	cold shock domain containing C2, RNA binding	31	1	0	1	0	0
HN1L	ENST00000248098.3	hematological and neurological expressed 1-like	1302	1	0	1	0	1
C14orf2	ENST00000553430.1	chromosome 14 open reading frame 2	1228	1	0	1	0	0
MAB21L2	ENST00000317605.4	mab-21-like 2 (C. elegans)	63	1	0	0	1	0
CYP1A1	ENST00000379727.3	cytochrome P450, family 1, subfamily A, polypeptide 1	837	1	0	1	0	0
RDH12	ENST00000551171.1	retinol dehydrogenase 12 (all-trans/9-cis/11-cis)	20	1	0	0	1	0
SLC25A21	ENST00000331299.5	solute carrier family 25 (mitochondrial oxoadipate carrier), member 21	110	8	7	0	1	2
BACE2	ENST00000328735.6	beta-site APP-cleaving enzyme 2	79	2	2	0	0	1
CDH2	ENST00000269141.3	cadherin 2, type 1, N-cadherin (neuronal)	1230	3	1	0	2	0
RNF180	ENST00000389100.4	ring finger protein 180	18	2	1	0	1	0
UBTD2	ENST00000393792.2	ubiquitin domain containing 2	297	2	1	0	1	0
DDR1	ENST00000446312.1	discoidin domain receptor tyrosine kinase 1	195	3	0	3	0	1
SAMD14	ENST00000330175.4	sterile alpha motif domain containing 14	88	2	0	2	0	0
HSPB7	ENST00000411503.1	heat shock 27kDa protein family, member 7 (cardiovascular)	5	1	0	1	0	0
XXbac-BPG32J3.20	ENST00000461287.1		1251	2	0	2	0	1
SEPSECS	ENST00000302922.3	Sep (O-phosphoserine) tRNA:Sec (selenocysteine) tRNA synthase	279	1	1	0	0	0
C1orf35	ENST00000272139.4	chromosome 1 open reading frame 35	32	2	0	1	1	0
GNAQ	ENST00000286548.4	guanine nucleotide binding protein (G protein), q polypeptide	47	3	1	1	1	2
CLOCK	ENST00000309964.4	clock circadian regulator	86	3	0	1	2	0
MICAL2	ENST00000379612.3	microtubule associated monooxygenase, calponin and LIM domain containing 2	1742	1	1	0	0	0
CKAP4	ENST00000378026.4	cytoskeleton-associated protein 4	1923	1	0	1	0	0
MCAT	ENST00000327555.5	malonyl CoA:ACP acyltransferase (mitochondrial)	133	1	0	0	1	1
C9orf72	ENST00000380003.3	chromosome 9 open reading frame 72	25	1	0	1	0	0
OR10G2	ENST00000542433.1	olfactory receptor, family 10, subfamily G, member 2	5	1	0	0	1	0
AL020996.1	ENST00000536896.1	Uncharacterized protein	5	1	0	1	0	1
PES1	ENST00000354694.7	pescadillo ribosomal biogenesis factor 1	848	1	0	0	1	1
JMY	ENST00000396137.4	junction mediating and regulatory protein, p53 cofactor	10	3	1	1	1	0
PRSS23	ENST00000280258.5	protease, serine, 23	10562	1	0	0	1	0
SMIM12	ENST00000521580.2	small integral membrane protein 12	1091	2	1	0	1	0
CUL9	ENST00000252050.4	cullin 9	127	1	0	1	0	0
ANKRD63	ENST00000434396.1	ankyrin repeat domain 63	5	2	1	1	0	0
BRINP3	ENST00000367462.3	bone morphogenetic protein/retinoic acid inducible neural-specific 3	23	1	0	0	1	0
TRIM2	ENST00000338700.5	tripartite motif containing 2	22	2	0	0	2	1
TMEM132B	ENST00000299308.3	transmembrane protein 132B	5	2	0	1	1	1
POU5F1	ENST00000441888.3	POU class 5 homeobox 1	5	1	0	0	1	0
CLSTN2	ENST00000458420.3	calsyntenin 2	119	3	1	1	1	2
GRB10	ENST00000398812.2	growth factor receptor-bound protein 10	1382	2	0	1	1	0
C16orf62	ENST00000543152.1	chromosome 16 open reading frame 62	599	1	1	0	0	0
PSMG4	ENST00000473000.2	proteasome (prosome, macropain) assembly chaperone 4	1452	1	0	1	0	2
SH3BGRL	ENST00000373212.5	SH3 domain binding glutamic acid-rich protein like	2034	1	0	0	1	1
GREM2	ENST00000318160.4	gremlin 2, DAN family BMP antagonist	631	1	1	0	0	0
CORO2B	ENST00000261861.5	coronin, actin binding protein, 2B	751	1	1	0	0	0
NKAIN4	ENST00000370316.3	Na+/K+ transporting ATPase interacting 4	5	1	0	1	0	0
VAV2	ENST00000406606.3	vav 2 guanine nucleotide exchange factor	477	3	1	2	0	0
RTKN2	ENST00000373789.3	rhotekin 2	192	2	1	1	0	1
DPCR1	ENST00000462446.1	diffuse panbronchiolitis critical region 1	5	1	0	1	0	1
ARHGEF3	ENST00000296315.3	Rho guanine nucleotide exchange factor (GEF) 3	359	1	0	1	0	0
FGFR2	ENST00000369061.4	fibroblast growth factor receptor 2	75	1	0	1	0	0
SNX22	ENST00000325881.4	sorting nexin 22	5	1	0	1	0	0
PRMT8	ENST00000382622.3	protein arginine methyltransferase 8	5	1	0	0	1	0
CDH13	ENST00000566620.1	cadherin 13	1020	2*	1	0	0	1
TCTEX1D1	ENST00000282670.2	Tctex1 domain containing 1	20	1	0	0	1	0
CHST11	ENST00000549260.1	carbohydrate (chondroitin 4) sulfotransferase 11	686	1	0	0	1	1
UEVLD	ENST00000541984.1	UEV and lactate/malate dehyrogenase domains	39	1	0	0	1	0
TIMP3	ENST00000266085.6	TIMP metallopeptidase inhibitor 3	7421	1	0	1	0	0
GATA4	ENST00000335135.4	GATA binding protein 4	5	1	1	0	0	0
EHHADH	ENST00000231887.3	enoyl-CoA, hydratase/3-hydroxyacyl CoA dehydrogenase	150	1	0	0	1	0
ZNF608	ENST00000504926.1	zinc finger protein 608	22	1	1	0	0	0
SELL	ENST00000236147.4	selectin L	5	1	0	1	0	0
FAM181A	ENST00000267594.5	family with sequence similarity 181, member A	5	1	0	1	0	0
COMMD8	ENST00000381571.4	COMM domain containing 8	1146	1	0	0	1	0
FZD3	ENST00000240093.3	frizzled family receptor 3	192	2	0	1	1	0
LDB1	ENST00000361198.5	LIM domain binding 1	61	1	1	0	0	0
CDK5R2	ENST00000302625.4	cyclin-dependent kinase 5, regulatory subunit 2 (p39)	24	1	1	0	0	0
PLA2G4E	ENST00000399518.3	phospholipase A2, group IVE	5	1	1	0	0	0
PPP2R5A	ENST00000261461.2	protein phosphatase 2, regulatory subunit B', alpha	13	1	1	0	0	0
C16orf45	ENST00000300006.4	chromosome 16 open reading frame 45	60	3	0	2	1	0
LONRF3	ENST00000304778.7	LON peptidase N-terminal domain and ring finger 3	36	2	1	0	1	0
KIAA1211	ENST00000504228.1	KIAA1211	631	1	1	0	0	0
FKBP14	ENST00000222803.5	FK506 binding protein 14, 22 kDa	939	1	0	0	1	2
ENTPD3	ENST00000301825.3	ectonucleoside triphosphate diphosphohydrolase 3	5	1	0	0	1	0
ZNF784	ENST00000591479.1	zinc finger protein 784	19	1	0	1	0	0
TBC1D31	ENST00000378080.2	TBC1 domain family, member 31	696	1	0	0	1	0
SOX5	ENST00000546136.1	SRY (sex determining region Y)-box 5	43	5	1	1	3	2
VEGFA	ENST00000417285.2	vascular endothelial growth factor A	907	1	0	0	1	1
SLC25A36	ENST00000446041.2	solute carrier family 25 (pyrimidine nucleotide carrier ), member 36	264	1	1	0	0	0
PIGO	ENST00000298004.5	phosphatidylinositol glycan anchor biosynthesis, class O	152	1	0	0	1	1
FCRL1	ENST00000368176.3	Fc receptor-like 1	5	1	0	1	0	0
OR51E1	ENST00000396952.5	olfactory receptor, family 51, subfamily E, member 1	5	1	0	0	1	0
RTN4RL1	ENST00000331238.6	reticulon 4 receptor-like 1	82	1	0	1	0	1
GRB2	ENST00000392563.1	growth factor receptor-bound protein 2	2660	1	1	0	0	0
TAGAP	ENST00000367066.3	T-cell activation RhoGTPase activating protein	5	1	0	1	0	0
BIN2	ENST00000452142.2	bridging integrator 2	5	1	1	0	0	0
IER5	ENST00000367577.4	immediate early response 5	11212	2	1	1	0	1
COG4	ENST00000323786.5	component of oligomeric golgi complex 4	2411	1	0	0	1	0
NKX2-3	ENST00000344586.7	NK2 homeobox 3	5	1	0	1	0	0
FAM76B	ENST00000358780.5	family with sequence similarity 76, member B	186	1	0	0	1	0
TECPR2	ENST00000359520.7	tectonin beta-propeller repeat containing 2	109	2	0	2	0	0
DTL	ENST00000366991.4	denticleless E3 ubiquitin protein ligase homolog (Drosophila)	883	1	1	0	0	0
PRKCB	ENST00000303531.7	protein kinase C, beta	81	2	1	0	1	1
DMGDH	ENST00000380311.4	dimethylglycine dehydrogenase	17	1	0	0	1	1
OVCA2	ENST00000572195.1	ovarian tumor suppressor candidate 2	2807	1	0	0	1	0
SLC35A3	ENST00000465289.1	solute carrier family 35 (UDP-N-acetylglucosamine (UDP-GlcNAc) transporter), member A3	191	1	1	0	0	0
ZBTB8B	ENST00000609129.1	zinc finger and BTB domain containing 8B	18	2	0	0	2	1
RAB30	ENST00000533486.1	RAB30, member RAS oncogene family	274	2	1	1	0	2
CAPN5	ENST00000531028.1	calpain 5	89	1	0	0	1	0
FOXN3	ENST00000345097.4	forkhead box N3	42	4	1	1	2	0
BEND2	ENST00000380033.4	BEN domain containing 2	5	2*	0	0	1	0
AMPD3	ENST00000444303.2	adenosine monophosphate deaminase 3	5	1	0	0	1	1
FCRL4	ENST00000271532.1	Fc receptor-like 4	5	1	0	1	0	0
TMEM97	ENST00000226230.6	transmembrane protein 97	10226	1	0	1	0	0
XXcos-LUCA11.5	ENST00000606589.1		7	1	0	1	0	0
IL18R1	ENST00000409599.1	interleukin 18 receptor 1	40	1	0	0	1	0
UBTD1	ENST00000370664.3	ubiquitin domain containing 1	10	1	1	0	0	0
TIMM44	ENST00000270538.3	translocase of inner mitochondrial membrane 44 homolog (yeast)	417	1	0	0	1	0
TP53AIP1	ENST00000602346.1	tumor protein p53 regulated apoptosis inducing protein 1	5	1	0	0	1	0
PDYN	ENST00000539905.1	prodynorphin	5	1	1	0	0	0
COL9A1	ENST00000357250.6	collagen, type IX, alpha 1	9	2	0	0	2	0
SLC5A12	ENST00000396005.3	solute carrier family 5 (sodium/monocarboxylate cotransporter), member 12	8	2	0	0	2	0
UIMC1	ENST00000377227.4	ubiquitin interaction motif containing 1	322	1	0	0	1	0
SASS6	ENST00000287482.5	spindle assembly 6 homolog (C. elegans)	796	1	1	0	0	0
PREX2	ENST00000288368.4	phosphatidylinositol-3,4,5-trisphosphate-dependent Rac exchange factor 2	11	6	6	0	0	1
ERBB4	ENST00000342788.4	v-erb-b2 avian erythroblastic leukemia viral oncogene homolog 4	27	5	0	3	2	2
FAM213B	ENST00000378424.4	family with sequence similarity 213, member B	409	1	0	1	0	0
GCN1L1	ENST00000300648.6	GCN1 general control of amino-acid synthesis 1-like 1 (yeast)	1283	1	1	0	0	0
MED28	ENST00000237380.7	mediator complex subunit 28	1483	4	3	1	0	1
CCPG1	ENST00000310958.6	cell cycle progression 1	808	1	0	0	1	1
MMP15	ENST00000219271.3	matrix metallopeptidase 15 (membrane-inserted)	605	1	1	0	0	1
REPIN1	ENST00000479668.1	replication initiator 1	2836	1	0	1	0	0
APBB2	ENST00000295974.8	amyloid beta (A4) precursor protein-binding, family B, member 2	704	4	2	1	1	1
ERI1	ENST00000250263.7	exoribonuclease 1	120	1	0	0	1	1
ITGA3	ENST00000007722.7	integrin, alpha 3 (antigen CD49C, alpha 3 subunit of VLA-3 receptor)	197	3	1	1	1	0
SFMBT2	ENST00000361972.4	Scm-like with four mbt domains 2	107	2	0	2	0	0
CXCR6	ENST00000304552.4	chemokine (C-X-C motif) receptor 6	5	1	0	0	1	0
SERPINB4	ENST00000341074.5	serpin peptidase inhibitor, clade B (ovalbumin), member 4	5	1	0	0	1	0
NKIRAS2	ENST00000462043.2	NFKB inhibitor interacting Ras-like 2	9685	1	0	0	1	0
KATNAL1	ENST00000380615.3	katanin p60 subunit A-like 1	335	3	2	1	0	1
DEDD2	ENST00000336034.4	death effector domain containing 2	32	1	0	1	0	0
RBM24	ENST00000379052.5	RNA binding motif protein 24	43	1	0	1	0	0
RNF144A	ENST00000320892.6	ring finger protein 144A	124	2	0	2	0	0
RP11-156E8.1	ENST00000607453.1		51	2	0	0	2	0
NOTCH2	ENST00000256646.2	notch 2	734	2	1	1	0	0
SEMA5A	ENST00000382496.5	sema domain, seven thrombospondin repeats (type 1 and type 1-like), transmembrane domain (TM) and short cytoplasmic domain, (semaphorin) 5A	98	5	3	1	1	1
BROX	ENST00000537020.1	BRO1 domain and CAAX motif containing	149	2	0	1	1	1
FAM47E	ENST00000515604.1	Protein FAM47E	503	1	0	1	0	0
DENND1B	ENST00000235453.4	DENN/MADD domain containing 1B	6	1	0	0	1	0
TTC22	ENST00000371276.4	tetratricopeptide repeat domain 22	5	1	0	0	1	0
EDA	ENST00000374553.2	ectodysplasin A	9	2	0	2	0	0
FAM83B	ENST00000306858.7	family with sequence similarity 83, member B	140	2	1	0	1	2
RUNDC1	ENST00000361677.1	RUN domain containing 1	927	1	0	1	0	0
PRR5L	ENST00000527487.1	proline rich 5 like	238	2	0	1	1	0
ECM1	ENST00000369047.4	extracellular matrix protein 1	575	1	1	0	0	0
LHFP	ENST00000379589.3	lipoma HMGIC fusion partner	5	1	0	0	1	0
IYD	ENST00000344419.3	iodotyrosine deiodinase	5	1	1	0	0	0
FLT3LG	ENST00000596435.1	fms-related tyrosine kinase 3 ligand	25	1	0	0	1	0
SERPINA9	ENST00000448305.2	serpin peptidase inhibitor, clade A (alpha-1 antiproteinase, antitrypsin), member 9	5	1	0	0	1	0
MIXL1	ENST00000366810.5	Mix paired-like homeobox	16	1	0	1	0	0
RGS12	ENST00000538395.1	regulator of G-protein signaling 12	635	1	0	1	0	1
EDN3	ENST00000311585.7	endothelin 3	5	1	0	0	1	0
GABRG1	ENST00000295452.4	gamma-aminobutyric acid (GABA) A receptor, gamma 1	5	2	0	0	2	0
RP11-181C3.1	ENST00000501499.1	Uncharacterized protein	7	1	0	0	1	0
PTH2R	ENST00000272847.2	parathyroid hormone 2 receptor	5	1	0	0	1	0
RALGPS1	ENST00000259351.5	Ral GEF with PH domain and SH3 binding motif 1	34	1	0	1	0	0
C15orf62	ENST00000344320.6	chromosome 15 open reading frame 62	8	1	0	1	0	0
MKL2	ENST00000318282.5	MKL/myocardin-like 2	992	1	1	0	0	0
TNIK	ENST00000436636.2	TRAF2 and NCK interacting kinase	106	3	0	0	3	2
FAM13B	ENST00000033079.3	family with sequence similarity 13, member B	220	1	0	0	1	0
SLC2A14	ENST00000340749.5	solute carrier family 2 (facilitated glucose transporter), member 14	14	2	0	1	1	0
SNAPC3	ENST00000380821.3	small nuclear RNA activating complex, polypeptide 3, 50kDa	2406	1	0	0	1	1
RWDD2A	ENST00000369724.4	RWD domain containing 2A	286	2	0	1	1	1
SEH1L	ENST00000262124.11	SEH1-like (S. cerevisiae)	632	1	0	0	1	0
C10orf126	ENST00000375520.1	chromosome 10 open reading frame 126	5	1	0	0	1	0
ZPLD1	ENST00000306176.1	zona pellucida-like domain containing 1	5	1	0	1	0	0
FANCE	ENST00000229769.2	Fanconi anemia, complementation group E	1562	1	0	0	1	0
FGF7	ENST00000267843.4	fibroblast growth factor 7	5	1	0	0	1	1
ASCC2	ENST00000307790.3	activating signal cointegrator 1 complex subunit 2	139	1	0	0	1	0
STK3	ENST00000419617.2	serine/threonine kinase 3	25	1	0	0	1	1
NYX	ENST00000342595.2	nyctalopin	5	1	0	1	0	0
ADIPOR2	ENST00000357103.4	adiponectin receptor 2	138	1	0	1	0	0
KCNJ3	ENST00000295101.2	potassium inwardly-rectifying channel, subfamily J, member 3	21	1	0	0	1	0
BTBD7	ENST00000334746.5	BTB (POZ) domain containing 7	590	2	1	1	0	0
ETV5	ENST00000306376.5	ets variant 5	1085	1	0	0	1	0
C20orf195	ENST00000370098.3	chromosome 20 open reading frame 195	11	1	0	1	0	0
PAQR3	ENST00000512733.1	progestin and adipoQ receptor family member III	217	2	0	0	2	0
APPL1	ENST00000288266.3	adaptor protein, phosphotyrosine interaction, PH domain and leucine zipper containing 1	908	2	0	0	2	2
ADPRHL1	ENST00000356501.4	ADP-ribosylhydrolase like 1	161	1	0	1	0	1
TYK2	ENST00000524462.1	tyrosine kinase 2	301	1	0	1	0	0
PIK3C2A	ENST00000265970.7	phosphatidylinositol-4-phosphate 3-kinase, catalytic subunit type 2 alpha	280	1	0	1	0	0
AL031666.2	ENST00000599904.1	HCG2018772; Uncharacterized protein; cDNA FLJ31609 fis, clone NT2RI2002852	5	1	0	0	1	0
RBBP7	ENST00000380087.2	retinoblastoma binding protein 7	270	1	0	0	1	0
WBP1L	ENST00000369889.4	WW domain binding protein 1-like	5	1	0	0	1	0
LAIR1	ENST00000391743.3	leukocyte-associated immunoglobulin-like receptor 1	5	1	0	0	1	0
LCE2C	ENST00000368783.1	late cornified envelope 2C	5	1	0	0	1	0
CNIH4	ENST00000465271.1	cornichon family AMPA receptor auxiliary protein 4	1348	1	1	0	0	1
FBXL17	ENST00000359660.5	F-box and leucine-rich repeat protein 17	182	1	0	0	1	1
C21orf59	ENST00000382549.4	chromosome 21 open reading frame 59	288	1	0	0	1	1
UHRF1BP1L	ENST00000279907.7	UHRF1 binding protein 1-like	369	2	2	0	0	1
DCUN1D1	ENST00000292782.4	DCN1, defective in cullin neddylation 1, domain containing 1	267	2	0	2	0	0
LYNX1	ENST00000395192.2	Ly6/neurotoxin 1	5	1	0	1	0	1
LINGO1	ENST00000355300.6	leucine rich repeat and Ig domain containing 1	42	1	0	1	0	0
ZMIZ1	ENST00000334512.5	zinc finger, MIZ-type containing 1	568	3	1	1	1	0
SELT	ENST00000471696.1	Selenoprotein T	538	1	0	1	0	0
GPRIN2	ENST00000374314.4	G protein regulated inducer of neurite outgrowth 2	5	4	1	2	1	1
GPR39	ENST00000329321.3	G protein-coupled receptor 39	151	1	0	0	1	0
ELOVL3	ENST00000370005.3	ELOVL fatty acid elongase 3	15	1	1	0	0	0
WDR59	ENST00000262144.6	WD repeat domain 59	24	4	3	1	0	0
CACNB4	ENST00000539935.1	calcium channel, voltage-dependent, beta 4 subunit	57	2	0	0	2	0
DST	ENST00000312431.6	dystonin	439	4	0	1	3	0
SLC2A3	ENST00000075120.7	solute carrier family 2 (facilitated glucose transporter), member 3	5	2	0	1	1	0
EHF	ENST00000257831.3	ets homologous factor	5	1	0	0	1	0
ENPP3	ENST00000358229.5	ectonucleotide pyrophosphatase/phosphodiesterase 3	37	1	0	1	0	1
WDR7	ENST00000254442.3	WD repeat domain 7	365	1	1	0	0	0
SMPD3	ENST00000219334.5	sphingomyelin phosphodiesterase 3, neutral membrane (neutral sphingomyelinase II)	9	2	0	1	1	0
USP6	ENST00000332776.4	ubiquitin specific peptidase 6 (Tre-2 oncogene)	5	1	0	0	1	1
GAS2	ENST00000454584.2	growth arrest-specific 2	13	1	0	0	1	0
DYM	ENST00000442713.2	dymeclin	547	1	0	1	0	0
SLC6A1	ENST00000287766.4	solute carrier family 6 (neurotransmitter transporter), member 1	5	1	1	0	0	0
CARNS1	ENST00000307823.3	carnosine synthase 1	14	1	0	1	0	0
SLC16A14	ENST00000295190.4	solute carrier family 16, member 14	34	1	0	1	0	0
KCNQ3	ENST00000388996.4	potassium voltage-gated channel, KQT-like subfamily, member 3	5	2	0	1	1	0
SLC24A1	ENST00000261892.6	solute carrier family 24 (sodium/potassium/calcium exchanger), member 1	92	1	0	1	0	0
OSBPL9	ENST00000371710.3	oxysterol binding protein-like 9	4836	2	0	1	1	0
ENC1	ENST00000302351.4	ectodermal-neural cortex 1 (with BTB domain)	57	2	0	0	2	0
CDKL1	ENST00000395834.1	cyclin-dependent kinase-like 1 (CDC2-related kinase)	90	1	0	1	0	0
KIRREL	ENST00000368172.1	kin of IRRE like (Drosophila)	493	1	1	0	0	1
GINS2	ENST00000253462.3	GINS complex subunit 2 (Psf2 homolog)	136	2	1	1	0	0
PPAN-P2RY11	ENST00000428358.1	PPAN-P2RY11 readthrough	293	1	0	1	0	0
ALDH8A1	ENST00000265605.2	aldehyde dehydrogenase 8 family, member A1	48	1	0	1	0	0
FHOD3	ENST00000257209.4	formin homology 2 domain containing 3	5	1	0	0	1	1
UBAP2L	ENST00000343815.6	ubiquitin associated protein 2-like	3367	1	0	1	0	0
AGBL4	ENST00000371839.1	ATP/GTP binding protein-like 4	5	1	0	0	1	0
C7orf76	ENST00000356686.1	chromosome 7 open reading frame 76	5	1	0	0	1	0
TMEM217	ENST00000336655.2	transmembrane protein 217	44	1	0	0	1	0
LBR	ENST00000272163.4	lamin B receptor	1217	1	0	0	1	0
TRAM2	ENST00000182527.3	translocation associated membrane protein 2	2774	1	0	1	0	0
MAFK	ENST00000343242.4	v-maf avian musculoaponeurotic fibrosarcoma oncogene homolog K	322	1	0	0	1	1
UBE2Q2	ENST00000267938.4	ubiquitin-conjugating enzyme E2Q family member 2	106	1	0	0	1	0
LDB2	ENST00000502640.1	LIM domain binding 2	23	1	0	0	1	0
DUSP7	ENST00000495880.1	dual specificity phosphatase 7	68	1	1	0	0	0
NDFIP2	ENST00000218652.7	Nedd4 family interacting protein 2	1747	1	0	1	0	0
STARD4	ENST00000512160.1	StAR-related lipid transfer (START) domain containing 4	767	1	0	0	1	1
BMI1	ENST00000376663.3	BMI1 polycomb ring finger oncogene	200	1	0	0	1	0
HOXB6	ENST00000484302.2	homeobox B6	12	1	1	0	0	0
CCKBR	ENST00000334619.2	cholecystokinin B receptor	9	1	0	0	1	0
CCDC71L	ENST00000523505.1	coiled-coil domain containing 71-like	410	2	2	0	0	0
KLHL18	ENST00000232766.5	kelch-like family member 18	74	2	0	0	2	0
ZNF597	ENST00000301744.4	zinc finger protein 597	159	1	0	0	1	0
UBXN2B	ENST00000399598.2	UBX domain protein 2B	157	1	0	1	0	3
RGS7	ENST00000348120.2	regulator of G-protein signaling 7	8	1	0	0	1	0
CDH8	ENST00000584337.1	cadherin 8, type 2	11	2	1	1	0	1
ZNF251	ENST00000292562.7	zinc finger protein 251	38	1	0	1	0	0
TICAM2	ENST00000408996.4	toll-like receptor adaptor molecule 2	202	1	0	0	1	0
LARP1B	ENST00000441387.1	La ribonucleoprotein domain family, member 1B	32	2	0	1	1	0
KCTD11	ENST00000333751.3	potassium channel tetramerization domain containing 11	42	1	0	0	1	0
NSF	ENST00000225282.8	N-ethylmaleimide-sensitive factor	86	1	0	1	0	1
BRINP2	ENST00000361539.4	bone morphogenetic protein/retinoic acid inducible neural-specific 2	5	1	1	0	0	0
PPM1K	ENST00000608933.1	protein phosphatase, Mg2+/Mn2+ dependent, 1K	46	1	0	0	1	0
CDH24	ENST00000397359.3	cadherin 24, type 2	44	1	1	0	0	0
M1AP	ENST00000290536.5	meiosis 1 associated protein	5	1	0	0	1	0
LPPR1	ENST00000374874.3	Lipid phosphate phosphatase-related protein type 1	19	1	0	0	1	0
INO80D	ENST00000403263.1	INO80 complex subunit D	5	4	1	1	2	1
MAN2A2	ENST00000360468.3	mannosidase, alpha, class 2A, member 2	340	8	7	1	0	0
MTF2	ENST00000370298.4	metal response element binding transcription factor 2	653	1	0	0	1	0
FBXO28	ENST00000424254.2	F-box protein 28	461	3	1	0	2	0
ZNRF2	ENST00000323037.4	zinc and ring finger 2	403	1	0	0	1	0
TPCN1	ENST00000335509.6	two pore segment channel 1	401	1	0	1	0	1
NTRK3	ENST00000394480.2	neurotrophic tyrosine kinase, receptor, type 3	7	1	1	0	0	0
DUSP8	ENST00000397374.3	dual specificity phosphatase 8	26	1	0	0	1	0
TMEM51	ENST00000434578.2	transmembrane protein 51	87	1	0	1	0	0
JUNB	ENST00000302754.4	jun B proto-oncogene	1055	1	0	1	0	0
PRDM13	ENST00000369215.4	PR domain containing 13	17	1	0	1	0	0
PDK2	ENST00000503176.1	pyruvate dehydrogenase kinase, isozyme 2	681	2	1	1	0	1
MOSPD1	ENST00000370783.3	motile sperm domain containing 1	83	1	0	0	1	1
ONECUT1	ENST00000560699.2	one cut homeobox 1	10	2	0	0	2	0
ZNF366	ENST00000318442.5	zinc finger protein 366	5	3	1	1	1	1
HSPA4L	ENST00000296464.4	heat shock 70kDa protein 4-like	348	3	0	1	2	0
CREG2	ENST00000324768.5	cellular repressor of E1A-stimulated genes 2	38	2	0	1	1	2
MATN1	ENST00000373765.4	matrilin 1, cartilage matrix protein	5	1	0	0	1	0
GLYR1	ENST00000436648.5	glyoxylate reductase 1 homolog (Arabidopsis)	31	1	1	0	0	0
GLRA1	ENST00000274576.4	glycine receptor, alpha 1	5	1	0	1	0	0
PLXDC1	ENST00000315392.4	plexin domain containing 1	9	2	0	0	2	1
PPM1H	ENST00000228705.6	protein phosphatase, Mg2+/Mn2+ dependent, 1H	45	1	1	0	0	3
CEBPA	ENST00000498907.2	CCAAT/enhancer binding protein (C/EBP), alpha	12449	1	0	1	0	0
C6orf106	ENST00000374023.3	chromosome 6 open reading frame 106	80	1	1	0	0	0
STIM2	ENST00000467011.1	stromal interaction molecule 2	380	2	0	0	2	0
CD82	ENST00000227155.4	CD82 molecule	1117	1	0	1	0	0
LPP	ENST00000312675.4	LIM domain containing preferred translocation partner in lipoma	1894	6	4	1	1	2
ARCN1	ENST00000359415.4	archain 1	1139	1	0	1	0	1
TDRKH	ENST00000368825.3	tudor and KH domain containing	325	1	0	0	1	0
ZNF436	ENST00000314011.4	zinc finger protein 436	73	2	1	1	0	0
RANBP3L	ENST00000296604.3	RAN binding protein 3-like	5	1	0	0	1	0
TMCC1	ENST00000432054.2	transmembrane and coiled-coil domain family 1	97	2	0	1	1	0
FAM222B	ENST00000582266.1	family with sequence similarity 222, member B	100	1	0	0	1	1
ALPK2	ENST00000361673.3	alpha-kinase 2	395	1	0	1	0	0
CCDC141	ENST00000420890.2	coiled-coil domain containing 141	5	1	0	1	0	1
CCDC64	ENST00000397558.2	coiled-coil domain containing 64	7	1	0	0	1	0
SLC25A22	ENST00000320230.5	solute carrier family 25 (mitochondrial carrier: glutamate), member 22	319	1	1	0	0	0
FAM19A4	ENST00000295569.7	family with sequence similarity 19 (chemokine (C-C motif)-like), member A4	5	1	0	0	1	0
PQLC3	ENST00000402361.1	PQ loop repeat containing 3	26	1	0	0	1	0
FCRL5	ENST00000361835.3	Fc receptor-like 5	5	1	0	1	0	0
GLIS3	ENST00000324333.10	GLIS family zinc finger 3	47	3	0	1	2	1
PROX1	ENST00000366958.4	prospero homeobox 1	131	2	1	1	0	0
CNTN4	ENST00000427331.1	contactin 4	191	1	0	0	1	0
GPR26	ENST00000284674.1	G protein-coupled receptor 26	5	1	1	0	0	2
ARID4B	ENST00000349213.3	AT rich interactive domain 4B (RBP1-like)	940	1	0	0	1	0
COLGALT1	ENST00000252599.4	collagen beta(1-O)galactosyltransferase 1	427	1	0	0	1	1
HTR5A	ENST00000287907.2	5-hydroxytryptamine (serotonin) receptor 5A, G protein-coupled	5	1	0	0	1	0
ALKBH5	ENST00000399138.4	alkB, alkylation repair homolog 5 (E. coli)	2211	1	0	0	1	0
RPS6KA3	ENST00000379565.3	ribosomal protein S6 kinase, 90kDa, polypeptide 3	769	3	0	2	1	1
ATP2C1	ENST00000505330.1	ATPase, Ca++ transporting, type 2C, member 1	771	2	0	0	2	0
GPR82	ENST00000302548.4	G protein-coupled receptor 82	5	1	0	0	1	0
HUNK	ENST00000270112.2	hormonally up-regulated Neu-associated kinase	85	1	0	1	0	0
C17orf78	ENST00000586700.1	chromosome 17 open reading frame 78	5	1	0	0	1	0
SLC6A17	ENST00000331565.4	solute carrier family 6 (neutral amino acid transporter), member 17	5	3	1	2	0	1
B3GAT2	ENST00000230053.6	beta-1,3-glucuronyltransferase 2 (glucuronosyltransferase S)	39	5	5	0	0	1
BMP3	ENST00000282701.2	bone morphogenetic protein 3	36	3	2	1	0	1
UBE2L6	ENST00000340573.4	ubiquitin-conjugating enzyme E2L 6	4657	1	0	0	1	0
RTF1	ENST00000389629.4	Rtf1, Paf1/RNA polymerase II complex component, homolog (S. cerevisiae)	1869	1	0	1	0	0
CS	ENST00000548567.1	citrate synthase	52	1	0	0	1	1
SLC5A8	ENST00000536262.2	solute carrier family 5 (sodium/monocarboxylate cotransporter), member 8	5	1	0	0	1	0
MTUS2	ENST00000431530.3	microtubule associated tumor suppressor candidate 2	17	3	2	1	0	0
RPRD1B	ENST00000373433.4	regulation of nuclear pre-mRNA domain containing 1B	1140	1	0	1	0	1
MYH11	ENST00000452625.2	myosin, heavy chain 11, smooth muscle	5	1	0	0	1	0
MAML2	ENST00000524717.1	mastermind-like 2 (Drosophila)	104	1	0	1	0	1
ATP9A	ENST00000311637.5	ATPase, class II, type 9A	1511	2	1	0	1	0
TOB2	ENST00000327492.3	transducer of ERBB2, 2	71	1	0	1	0	0
GPD1	ENST00000301149.3	glycerol-3-phosphate dehydrogenase 1 (soluble)	5	2	0	2	0	1
PARP9	ENST00000477522.2	poly (ADP-ribose) polymerase family, member 9	456	1	0	1	0	0
ANKRD23	ENST00000318357.4	ankyrin repeat domain 23	9	1	0	0	1	1
OSBP2	ENST00000382310.3	oxysterol binding protein 2	485	1	0	1	0	0
GK	ENST00000378946.3	glycerol kinase	38	1	1	0	0	1
LOXL4	ENST00000260702.3	lysyl oxidase-like 4	299	2	0	1	1	0
CSNK1E	ENST00000405675.3	casein kinase 1, epsilon	3032	1	0	0	1	0
MGST1	ENST00000540056.1	microsomal glutathione S-transferase 1	397	1	0	1	0	0
PCNT	ENST00000359568.5	pericentrin	92	2	0	2	0	0
MYOM3	ENST00000338909.5	myomesin 3	5	1	0	0	1	0
COMMD3-BMI1	ENST00000602390.1	COMMD3-BMI1 readthrough	195	1	0	0	1	0
SEPT5	ENST00000438754.2	septin 5	342	1	0	1	0	0
VTCN1	ENST00000359008.4	V-set domain containing T cell activation inhibitor 1	5	1	1	0	0	0
PAFAH1B1	ENST00000397195.5	platelet-activating factor acetylhydrolase 1b, regulatory subunit 1 (45kDa)	1570	1	0	0	1	0
BDH1	ENST00000392378.2	3-hydroxybutyrate dehydrogenase, type 1	39	6	6	0	0	0
MTMR3	ENST00000333027.3	myotubularin related protein 3	123	1	1	0	0	0
CLDN3	ENST00000395145.2	claudin 3	5	1	0	0	1	0
KCNA7	ENST00000221444.1	potassium voltage-gated channel, shaker-related subfamily, member 7	11	1	1	0	0	0
FGF13	ENST00000315930.6	fibroblast growth factor 13	17	1	0	0	1	0
DUSP9	ENST00000370167.4	dual specificity phosphatase 9	3766	1	0	0	1	1
FLRT2	ENST00000330753.4	fibronectin leucine rich transmembrane protein 2	73	2	0	0	2	0
FBXL7	ENST00000504595.1	F-box and leucine-rich repeat protein 7	16	1	1	0	0	1
H6PD	ENST00000377403.2	hexose-6-phosphate dehydrogenase (glucose 1-dehydrogenase)	467	1	0	0	1	1
AL033381.1	ENST00000314040.1	Uncharacterized protein; cDNA FLJ34594 fis, clone KIDNE2009109	5	1	0	0	1	0
DGKI	ENST00000453654.2	diacylglycerol kinase, iota	16	5	1	1	3	2
CHN2	ENST00000222792.6	chimerin 2	95	1	0	1	0	0
GABRQ	ENST00000370306.2	gamma-aminobutyric acid (GABA) A receptor, theta	14	3	1	0	2	1
PPP2R5E	ENST00000337537.3	protein phosphatase 2, regulatory subunit B', epsilon isoform	23	1	0	0	1	2
ADAMTS5	ENST00000284987.5	ADAM metallopeptidase with thrombospondin type 1 motif, 5	68	4	2	0	2	1
SULF1	ENST00000458141.2	sulfatase 1	11	2	0	1	1	0
LRCH3	ENST00000438796.2	leucine-rich repeats and calponin homology (CH) domain containing 3	399	1	1	0	0	1
KCNV1	ENST00000524391.1	potassium channel, subfamily V, member 1	5	1	0	0	1	1
MCU	ENST00000373053.3	mitochondrial calcium uniporter	2421	1	0	1	0	1
AQP4	ENST00000383168.4	aquaporin 4	10	1	0	1	0	1
MAL2	ENST00000276681.6	mal, T-cell differentiation protein 2 (gene/pseudogene)	2056	1	0	1	0	0
PLAG1	ENST00000316981.3	pleiomorphic adenoma gene 1	58	2	0	2	0	0
FRK	ENST00000606080.1	fyn-related kinase	37	2	1	0	1	0
TRIM8	ENST00000302424.7	tripartite motif containing 8	525	1	0	1	0	0
CYP7A1	ENST00000301645.3	cytochrome P450, family 7, subfamily A, polypeptide 1	5	1	0	0	1	1
KCTD9	ENST00000221200.4	potassium channel tetramerization domain containing 9	575	1	0	1	0	0
IFIT2	ENST00000371826.3	interferon-induced protein with tetratricopeptide repeats 2	9	1	1	0	0	0
NAA25	ENST00000261745.4	N(alpha)-acetyltransferase 25, NatB auxiliary subunit	919	1	1	0	0	1
CCDC50	ENST00000392455.3	coiled-coil domain containing 50	961	1	0	0	1	0
ABHD15	ENST00000307201.4	abhydrolase domain containing 15	240	1	1	0	0	0
LANCL2	ENST00000254770.2	LanC lantibiotic synthetase component C-like 2 (bacterial)	237	1	0	0	1	0
LUC7L3	ENST00000505658.1	LUC7-like 3 (S. cerevisiae)	2970	2	1	1	0	0
GPC6	ENST00000377047.4	glypican 6	410	1	1	0	0	1
KIAA0895L	ENST00000561621.1	KIAA0895-like	15	2	1	1	0	0
HAPLN4	ENST00000291481.7	hyaluronan and proteoglycan link protein 4	16	1	0	1	0	0
XKR4	ENST00000327381.6	XK, Kell blood group complex subunit-related family, member 4	5	3	0	2	1	1
CDH5	ENST00000341529.3	cadherin 5, type 2 (vascular endothelium)	8	1	0	0	1	1
ARHGEF10L	ENST00000452522.1	Rho guanine nucleotide exchange factor (GEF) 10-like	1019	1	0	0	1	0
TSPAN7	ENST00000378482.2	tetraspanin 7	2536	1	0	1	0	0
GALNT3	ENST00000392701.3	UDP-N-acetyl-alpha-D-galactosamine:polypeptide N-acetylgalactosaminyltransferase 3 (GalNAc-T3)	40	1	0	1	0	1
GOLGA3	ENST00000204726.3	golgin A3	944	1	1	0	0	0
ZNF691	ENST00000372508.3	zinc finger protein 691	115	6	5	1	0	0
RAD23B	ENST00000358015.3	RAD23 homolog B (S. cerevisiae)	1012	1	0	0	1	1
DCTN5	ENST00000300087.2	dynactin 5 (p25)	764	1	0	1	0	0
ANKRD13A	ENST00000261739.4	ankyrin repeat domain 13A	1644	1	0	1	0	0
SERTM1	ENST00000315190.3	serine-rich and transmembrane domain containing 1	12	1	0	1	0	2
HEPACAM	ENST00000298251.4	hepatic and glial cell adhesion molecule	5	1	0	0	1	1
SLC25A43	ENST00000217909.7	solute carrier family 25, member 43	5	1	0	0	1	0
TMEM182	ENST00000412401.2	transmembrane protein 182	69	2	0	0	2	0
DTWD2	ENST00000304058.4	DTW domain containing 2	83	1	0	1	0	0
LIN54	ENST00000395282.2	lin-54 homolog (C. elegans)	228	2	0	1	1	0
PDCD4	ENST00000280154.7	programmed cell death 4 (neoplastic transformation inhibitor)	612	1	0	0	1	1
RASL10B	ENST00000268864.3	RAS-like, family 10, member B	1495	1	0	1	0	0
GALNT13	ENST00000409237.1	UDP-N-acetyl-alpha-D-galactosamine:polypeptide N-acetylgalactosaminyltransferase 13 (GalNAc-T13)	49	1	0	1	0	1
NBEAL1	ENST00000449802.1	neurobeachin-like 1	42	2	1	0	1	0
ADORA1	ENST00000367235.1	adenosine A1 receptor	5	1	0	1	0	0
ZMAT1	ENST00000372782.3	zinc finger, matrin-type 1	5	1	0	0	1	0
CXorf48	ENST00000344129.2	chromosome X open reading frame 48	5	1	0	0	1	0
TESK1	ENST00000336395.5	testis-specific kinase 1	583	1	0	0	1	0
TOX4	ENST00000405508.1	TOX high mobility group box family member 4	309	1	0	1	0	0
MYSM1	ENST00000472487.1	Myb-like, SWIRM and MPN domains 1	38	2	1	1	0	1
MDGA1	ENST00000297153.7	MAM domain containing glycosylphosphatidylinositol anchor 1	240	2	0	2	0	1
RRAGC	ENST00000373001.3	Ras-related GTP binding C	1062	2	0	2	0	0
LAMA3	ENST00000313654.9	laminin, alpha 3	86	1	0	0	1	0
TNS4	ENST00000254051.6	tensin 4	40	5	3	1	1	0
ARF1	ENST00000540651.1	ADP-ribosylation factor 1	235	1	0	0	1	0
LRRC8B	ENST00000330947.2	leucine rich repeat containing 8 family, member B	326	2	0	0	2	1
SLAMF1	ENST00000302035.6	signaling lymphocytic activation molecule family member 1	5	1	0	0	1	0
KLHDC8B	ENST00000332780.2	kelch domain containing 8B	321	1	0	0	1	0
TRPM4	ENST00000252826.5	transient receptor potential cation channel, subfamily M, member 4	295	1	0	0	1	1
C5orf64	ENST00000505642.1	chromosome 5 open reading frame 64	5	1	0	0	1	0
TMEM255A	ENST00000309720.5	transmembrane protein 255A	113	1	0	1	0	0
HOXA7	ENST00000242159.3	homeobox A7	27	1	0	1	0	0
FAM216B	ENST00000537894.1	family with sequence similarity 216, member B	5	1	0	1	0	1
ASAP3	ENST00000495646.1	ArfGAP with SH3 domain, ankyrin repeat and PH domain 3	196	1	0	0	1	0
TBL3	ENST00000568546.1	transducin (beta)-like 3	57	2	1	1	0	0
NCAN	ENST00000252575.6	neurocan	5	2	0	1	1	0
CCSAP	ENST00000366687.1	centriole, cilia and spindle-associated protein	1210	1	0	1	0	0
ATP1A1	ENST00000295598.5	ATPase, Na+/K+ transporting, alpha 1 polypeptide	35110	1	0	1	0	0
AR	ENST00000374690.3	androgen receptor	57	1	0	0	1	1
C3orf52	ENST00000264848.5	chromosome 3 open reading frame 52	402	1	0	1	0	0
PLEKHA2	ENST00000420274.1	pleckstrin homology domain containing, family A (phosphoinositide binding specific) member 2	3303	2	0	1	1	1
PHOX2B	ENST00000226382.2	paired-like homeobox 2b	5	1	1	0	0	0
CIITA	ENST00000324288.8	class II, major histocompatibility complex, transactivator	5	2	1	1	0	2
MEX3C	ENST00000592416.1	mex-3 RNA binding family member C	5	1	0	0	1	1
PSMC3IP	ENST00000393795.3	PSMC3 interacting protein	42	1	0	0	1	1
CERK	ENST00000216264.8	ceramide kinase	123	1	0	1	0	0
LCORL	ENST00000326877.4	ligand dependent nuclear receptor corepressor-like	194	2	2	0	0	0
CHERP	ENST00000546361.2	calcium homeostasis endoplasmic reticulum protein	614	1	0	0	1	0
FNTB	ENST00000246166.2	farnesyltransferase, CAAX box, beta	13	1	0	1	0	0
AMPH	ENST00000325590.5	amphiphysin	16	1	0	0	1	0
OPRK1	ENST00000265572.3	opioid receptor, kappa 1	5	1	0	1	0	1
ASPA	ENST00000263080.2	aspartoacylase	5	1	0	0	1	0
DDX58	ENST00000379882.1	DEAD (Asp-Glu-Ala-Asp) box polypeptide 58	36	1	0	1	0	0
LRRC69	ENST00000343709.3	leucine rich repeat containing 69	12	1	0	0	1	0
CHST6	ENST00000332272.4	carbohydrate (N-acetylglucosamine 6-O) sulfotransferase 6	37	1	0	1	0	0
CATSPER4	ENST00000456354.2	cation channel, sperm associated 4	5	1	0	1	0	0
BARX1	ENST00000253968.6	BARX homeobox 1	10	1	0	1	0	0
CPEB3	ENST00000412050.4	cytoplasmic polyadenylation element binding protein 3	48	1	1	0	0	2
RBM27	ENST00000265271.5	RNA binding motif protein 27	130	2	0	1	1	1
RAB22A	ENST00000244040.3	RAB22A, member RAS oncogene family	484	2	1	0	1	1
MACROD2	ENST00000217246.4	MACRO domain containing 2	5	1	0	1	0	1
SWAP70	ENST00000318950.6	SWAP switching B-cell complex 70kDa subunit	492	1	1	0	0	0
TMEM239	ENST00000361033.1	transmembrane protein 239	5	1	0	1	0	0
TSHZ2	ENST00000371497.5	teashirt zinc finger homeobox 2	351	3	2	0	1	0
SMCR8	ENST00000406438.3	Smith-Magenis syndrome chromosome region, candidate 8	219	2	1	0	1	0
PPP1CA	ENST00000312989.7	protein phosphatase 1, catalytic subunit, alpha isozyme	16428	1	0	0	1	0
THUMPD2	ENST00000505747.1	THUMP domain containing 2	700	1	0	1	0	0
PPM1F	ENST00000263212.5	protein phosphatase, Mg2+/Mn2+ dependent, 1F	786	1	0	0	1	2
VAMP2	ENST00000404970.3	vesicle-associated membrane protein 2 (synaptobrevin 2)	1840	1	0	1	0	2
SPTB	ENST00000389721.5	spectrin, beta, erythrocytic	39	8	7	1	0	0
CENPP	ENST00000375587.3	centromere protein P	85	3	0	0	3	0
COL25A1	ENST00000399132.1	collagen, type XXV, alpha 1	270	1	1	0	0	1
TCEANC	ENST00000380600.1	transcription elongation factor A (SII) N-terminal and central domain containing	21	1	1	0	0	0
TACR3	ENST00000304883.2	tachykinin receptor 3	5	2	0	1	1	0
VGF	ENST00000249330.2	VGF nerve growth factor inducible	16	1	0	0	1	0
SLC25A42	ENST00000318596.7	solute carrier family 25, member 42	1088	2	0	2	0	0
YAP1	ENST00000282441.5	Yes-associated protein 1	1175	1	0	0	1	1
TAPT1	ENST00000405303.2	transmembrane anterior posterior transformation 1	105	1	0	1	0	1
TBX4	ENST00000393853.4	T-box 4	21	1	0	0	1	1
AC104841.2	ENST00000601871.1	HCG1777198, isoform CRA_a; PRO2900; Uncharacterized protein	5	1	0	0	1	0
CD93	ENST00000246006.4	CD93 molecule	5	1	0	1	0	1
ZFY	ENST00000383052.1	zinc finger protein, Y-linked	5	1	0	0	1	0
GAS1	ENST00000298743.7	growth arrest-specific 1	2904	1	0	1	0	0
KDM2B	ENST00000536437.1	lysine (K)-specific demethylase 2B	647	2	1	1	0	0
AL117190.3	ENST00000599197.1	Esophagus cancer-related gene-2 interaction susceptibility protein; Uncharacterized protein	30	1	0	1	0	1
SPOCK1	ENST00000394945.1	sparc/osteonectin, cwcv and kazal-like domains proteoglycan (testican) 1	935	1	0	1	0	4
SSH2	ENST00000582084.1	slingshot protein phosphatase 2	190	7	5	2	0	0
DOCK5	ENST00000276440.7	dedicator of cytokinesis 5	504	2	1	1	0	1
UBQLN2	ENST00000338222.5	ubiquilin 2	70	1	0	0	1	0
TACR1	ENST00000305249.5	tachykinin receptor 1	5	2	0	0	2	0
EMP1	ENST00000256951.5	epithelial membrane protein 1	814	1	0	1	0	2
TEX22	ENST00000451127.2	testis expressed 22	9	3	0	1	2	0
SPOPL	ENST00000280098.4	speckle-type POZ protein-like	216	1	0	0	1	0
NAT9	ENST00000357814.3	N-acetyltransferase 9 (GCN5-related, putative)	36	1	0	1	0	0
NPFFR1	ENST00000277942.6	neuropeptide FF receptor 1	5	1	0	1	0	3
ADAMTS13	ENST00000371916.1	ADAM metallopeptidase with thrombospondin type 1 motif, 13	41	1	0	1	0	1
FAM109B	ENST00000321753.3	family with sequence similarity 109, member B	78	1	0	0	1	0
TNS1	ENST00000171887.4	tensin 1	591	4	2	1	1	2
SCP2	ENST00000488965.1	sterol carrier protein 2	3640	1	0	0	1	1
CPED1	ENST00000310396.5	cadherin-like and PC-esterase domain containing 1	77	1	0	1	0	0
AMIGO1	ENST00000369864.4	adhesion molecule with Ig-like domain 1	167	1	1	0	0	0
FAM60A	ENST00000539409.1	family with sequence similarity 60, member A	58	1	0	0	1	0
SLC16A7	ENST00000261187.4	solute carrier family 16 (monocarboxylate transporter), member 7	73	2	1	0	1	5
CUX2	ENST00000261726.6	cut-like homeobox 2	15	2	1	0	1	1
HIST2H2BE	ENST00000369155.2	histone cluster 2, H2be	256	1	0	1	0	0
SERTAD2	ENST00000313349.3	SERTA domain containing 2	119	2	1	0	1	1
KLHDC10	ENST00000335420.5	kelch domain containing 10	347	2	2	0	0	0
ZNF148	ENST00000360647.4	zinc finger protein 148	230	1	0	0	1	2
RDX	ENST00000343115.4	radixin	44	1	1	0	0	0
HMGCS1	ENST00000325110.6	3-hydroxy-3-methylglutaryl-CoA synthase 1 (soluble)	3730	1	0	0	1	1
SPRY4	ENST00000344120.4	sprouty homolog 4 (Drosophila)	110	2	1	0	1	0
IQCJ	ENST00000482126.1	IQ motif containing J	5	1	0	1	0	1
CHD7	ENST00000423902.2	chromodomain helicase DNA binding protein 7	925	4	1	1	2	1
CES4A	ENST00000540947.2	carboxylesterase 4A	30	1	0	1	0	0
FMN1	ENST00000334528.9	formin 1	25	1	0	1	0	1
GNAO1	ENST00000262493.6	guanine nucleotide binding protein (G protein), alpha activating activity polypeptide O	8	1	0	0	1	1
RFX7	ENST00000423270.1	regulatory factor X, 7	1049	2	2	0	0	0
FKRP	ENST00000318584.5	fukutin related protein	989	1	0	0	1	0
ST3GAL3	ENST00000372377.4	ST3 beta-galactoside alpha-2,3-sialyltransferase 3	135	1	0	0	1	1
COL10A1	ENST00000243222.4	collagen, type X, alpha 1	5	1	0	0	1	0
TTC9	ENST00000256367.2	tetratricopeptide repeat domain 9	39	2	2	0	0	0
AKAP13	ENST00000394518.2	A kinase (PRKA) anchor protein 13	53	5	2	2	1	0
DYRK1A	ENST00000339659.4	dual-specificity tyrosine-(Y)-phosphorylation regulated kinase 1A	448	2	1	1	0	2
EP300	ENST00000263253.7	E1A binding protein p300	785	1	0	1	0	0
ARPC3	ENST00000228825.7	actin related protein 2/3 complex, subunit 3, 21kDa	323	1	0	0	1	0
C20orf197	ENST00000313426.1	chromosome 20 open reading frame 197	5	1	0	0	1	0
SUZ12	ENST00000322652.5	SUZ12 polycomb repressive complex 2 subunit	104	1	0	0	1	0
BSND	ENST00000371265.4	Bartter syndrome, infantile, with sensorineural deafness (Barttin)	5	3	1	1	1	1
FBXL2	ENST00000484457.1	F-box and leucine-rich repeat protein 2	12	1	1	0	0	0
PEG3	ENST00000423103.2	paternally expressed 3	5	2	1	0	1	0
IL1RL2	ENST00000264257.2	interleukin 1 receptor-like 2	8	1	0	0	1	0
ANKAR	ENST00000438402.2	ankyrin and armadillo repeat containing	5	1	0	0	1	0
NKPD1	ENST00000317951.4	NTPase, KAP family P-loop domain containing 1	10	2	0	2	0	0
NUP155	ENST00000231498.3	nucleoporin 155kDa	814	2	0	0	2	1
SLC7A1	ENST00000380752.5	solute carrier family 7 (cationic amino acid transporter, y+ system), member 1	338	2	2	0	0	1
ACSBG1	ENST00000258873.4	acyl-CoA synthetase bubblegum family member 1	5	2	1	1	0	0
CD247	ENST00000362089.5	CD247 molecule	9	1	0	0	1	1
TMEM261	ENST00000358227.4	transmembrane protein 261	61	1	0	1	0	0
HAUS5	ENST00000379045.2	HAUS augmin-like complex, subunit 5	133	1	0	1	0	0
NEUROG2	ENST00000313341.3	neurogenin 2	5	1	0	1	0	0
SPTLC3	ENST00000399002.2	serine palmitoyltransferase, long chain base subunit 3	24	2	0	0	2	1
EVX2	ENST00000308618.4	even-skipped homeobox 2	9	2	2	0	0	0
FKBP4	ENST00000001008.4	FK506 binding protein 4, 59kDa	727	1	0	0	1	0
DAZAP1	ENST00000336761.6	DAZ associated protein 1	3500	1	1	0	0	0
MAP2	ENST00000360351.4	microtubule-associated protein 2	68	4	2	2	0	1
RP6-24A23.6	ENST00000563887.1	Uncharacterized protein	937	1	0	0	1	0
C2CD4B	ENST00000380392.3	C2 calcium-dependent domain containing 4B	14	1	1	0	0	0
ZFX	ENST00000539115.1	zinc finger protein, X-linked	583	1	0	0	1	0
ZNF354C	ENST00000315475.6	zinc finger protein 354C	482	1	0	1	0	0
TMPRSS11E	ENST00000305363.4	transmembrane protease, serine 11E	5	1	0	0	1	0
KIAA0430	ENST00000396368.3	KIAA0430	461	2	0	1	1	0
ANTXR2	ENST00000403729.2	anthrax toxin receptor 2	51	9	4	3	2	0
PEX5L	ENST00000467460.1	peroxisomal biogenesis factor 5-like	5	2	1	0	1	0
DRG2	ENST00000395726.4	developmentally regulated GTP binding protein 2	1552	1	0	0	1	0
IL20RB	ENST00000309741.5	interleukin 20 receptor beta	16	1	0	0	1	0
PDXK	ENST00000468090.1	pyridoxal (pyridoxine, vitamin B6) kinase	5653	2	0	0	2	0
RHOQ	ENST00000238738.4	ras homolog family member Q	179	3	1	1	1	0
LCE2D	ENST00000368784.1	late cornified envelope 2D	5	1	0	0	1	0
KRT82	ENST00000257974.2	keratin 82	5	1	0	0	1	1
DDX6	ENST00000264018.4	DEAD (Asp-Glu-Ala-Asp) box helicase 6	11	2	0	1	1	1
STK35	ENST00000381482.3	serine/threonine kinase 35	263	3	0	1	2	0
PDK1	ENST00000282077.3	pyruvate dehydrogenase kinase, isozyme 1	637	1	0	0	1	0
ADAMTS4	ENST00000367996.5	ADAM metallopeptidase with thrombospondin type 1 motif, 4	23	4	3	0	1	0
PACSIN1	ENST00000244458.2	protein kinase C and casein kinase substrate in neurons 1	25	2	1	1	0	0
CRYBG3	ENST00000389622.2	beta-gamma crystallin domain containing 3	46	1	0	0	1	0
FAM57A	ENST00000308278.8	family with sequence similarity 57, member A	978	1	1	0	0	0
KCNC3	ENST00000376959.2	potassium voltage-gated channel, Shaw-related subfamily, member 3	5	1	0	1	0	2
USP47	ENST00000339865.5	ubiquitin specific peptidase 47	665	1	0	0	1	0
DNAJC5	ENST00000360864.4	DnaJ (Hsp40) homolog, subfamily C, member 5	1089	1	1	0	0	0
EXOC7	ENST00000607838.1	exocyst complex component 7	1483	2	1	1	0	1
TMEM170A	ENST00000357613.4	transmembrane protein 170A	70	2	0	0	2	1
KIAA0754	ENST00000530275.1	KIAA0754	5	1	0	0	1	0
IRF2BPL	ENST00000238647.3	interferon regulatory factor 2 binding protein-like	2145	1	0	0	1	0
TLR3	ENST00000296795.3	toll-like receptor 3	5	1	0	0	1	0
VSIG4	ENST00000455586.2	V-set and immunoglobulin domain containing 4	5	1	0	0	1	0
ZNF398	ENST00000420008.2	zinc finger protein 398	305	1	1	0	0	0
C19orf55	ENST00000544099.1	chromosome 19 open reading frame 55	59	2	1	0	1	0
PVRL1	ENST00000264025.3	poliovirus receptor-related 1 (herpesvirus entry mediator C)	50	2	0	0	2	2
BPTF	ENST00000321892.4	bromodomain PHD finger transcription factor	7	1	1	0	0	0
RORC	ENST00000356728.6	RAR-related orphan receptor C	42	1	0	0	1	0
P2RX1	ENST00000225538.3	purinergic receptor P2X, ligand-gated ion channel, 1	7	1	0	1	0	2
NFATC2	ENST00000371564.3	nuclear factor of activated T-cells, cytoplasmic, calcineurin-dependent 2	105	1	1	0	0	1
SYT1	ENST00000457153.2	synaptotagmin I	13	2	1	0	1	0
WNT2B	ENST00000369686.5	wingless-type MMTV integration site family, member 2B	5	2	0	0	2	1
GABPA	ENST00000354828.3	GA binding protein transcription factor, alpha subunit 60kDa	8	1	0	0	1	0
TRMT10B	ENST00000297994.3	tRNA methyltransferase 10 homolog B (S. cerevisiae)	19	1	0	1	0	0
TLL2	ENST00000357947.3	tolloid-like 2	5	1	1	0	0	1
PCDH12	ENST00000231484.3	protocadherin 12	5	1	0	1	0	0
PSKH1	ENST00000291041.5	protein serine kinase H1	699	1	0	1	0	1
ELK4	ENST00000357992.4	ELK4, ETS-domain protein (SRF accessory protein 1)	39	4	0	2	2	0
PXK	ENST00000463280.1	PX domain containing serine/threonine kinase	220	1	0	0	1	0
SENP1	ENST00000004980.5	SUMO1/sentrin specific peptidase 1	361	1	0	0	1	0
CDCP1	ENST00000296129.1	CUB domain containing protein 1	137	1	1	0	0	0
DHX37	ENST00000544745.1	DEAH (Asp-Glu-Ala-His) box polypeptide 37	63	1	0	1	0	0
NUMBL	ENST00000252891.4	numb homolog (Drosophila)-like	323	1	0	0	1	0
TCF7	ENST00000518915.1	transcription factor 7 (T-cell specific, HMG-box)	883	1	0	0	1	0
EMILIN2	ENST00000254528.3	elastin microfibril interfacer 2	272	1	0	1	0	0
CACHD1	ENST00000371073.2	cache domain containing 1	2071	1	0	0	1	0
RAB28	ENST00000338176.4	RAB28, member RAS oncogene family	302	1	0	1	0	0
FLJ45079	ENST00000374983.2		5	1	0	1	0	0
PDE11A	ENST00000286063.6	phosphodiesterase 11A	7	1	0	1	0	0
ABR	ENST00000302538.5	active BCR-related	58	1	0	1	0	0
SPTLC2	ENST00000216484.2	serine palmitoyltransferase, long chain base subunit 2	95	2	2	0	0	0
CALML4	ENST00000395465.3	calmodulin-like 4	307	8	3	1	4	1
ZNF646	ENST00000394979.2	zinc finger protein 646	5	2	1	1	0	0
ATRX	ENST00000373344.5	alpha thalassemia/mental retardation syndrome X-linked	77	2	0	1	1	1
GPD2	ENST00000540309.1	glycerol-3-phosphate dehydrogenase 2 (mitochondrial)	196	1	0	0	1	2
TAF8	ENST00000372977.3	TAF8 RNA polymerase II, TATA box binding protein (TBP)-associated factor, 43kDa	135	1	0	0	1	0
SERINC5	ENST00000512721.1	serine incorporator 5	175	1	0	0	1	0
E2F7	ENST00000416496.2	E2F transcription factor 7	308	1	1	0	0	1
SREK1IP1	ENST00000513458.4	SREK1-interacting protein 1	145	2	1	1	0	1
PAPL	ENST00000331256.5	Iron/zinc purple acid phosphatase-like protein	5	1	0	1	0	0
NHLRC4	ENST00000540585.1	NHL repeat containing 4	111	1	0	0	1	0
ADAMTS7	ENST00000388820.4	ADAM metallopeptidase with thrombospondin type 1 motif, 7	5	1	0	0	1	0
FBXO11	ENST00000402508.1	F-box protein 11	359	1	0	0	1	0
RP11-293M10.1	ENST00000553510.1	Uncharacterized protein	5	1	0	0	1	0
CXXC4	ENST00000394767.2	CXXC finger protein 4	121	1	0	1	0	0
DCLK1	ENST00000379892.4	doublecortin-like kinase 1	9	1	0	1	0	2
ERLIN2	ENST00000276461.5	ER lipid raft associated 2	887	1	0	1	0	1
C6	ENST00000337836.5	complement component 6	10	1	1	0	0	0
HNRNPA3	ENST00000411529.2	heterogeneous nuclear ribonucleoprotein A3	329	1	0	1	0	0
SNAP29	ENST00000215730.7	synaptosomal-associated protein, 29kDa	766	1	1	0	0	0
MEX3D	ENST00000402693.4	mex-3 RNA binding family member D	13	1	0	1	0	0
HS2ST1	ENST00000370550.5	heparan sulfate 2-O-sulfotransferase 1	787	1	0	0	1	0
DCUN1D2	ENST00000332592.3	DCN1, defective in cullin neddylation 1, domain containing 2	17	1	0	0	1	1
KCNIP4	ENST00000382148.3	Kv channel interacting protein 4	5	1	0	0	1	0
KIAA2022	ENST00000055682.6	KIAA2022	5	1	0	1	0	1
IKBKB	ENST00000379708.3	inhibitor of kappa light polypeptide gene enhancer in B-cells, kinase beta	806	1	0	1	0	0
AP1G1	ENST00000299980.4	adaptor-related protein complex 1, gamma 1 subunit	436	2	0	0	2	0
ATG2B	ENST00000359933.4	autophagy related 2B	146	1	0	0	1	0
GREM1	ENST00000560677.1	gremlin 1, DAN family BMP antagonist	752	1	0	0	1	0
RHOBTB2	ENST00000251822.6	Rho-related BTB domain containing 2	32	2	0	1	1	0
MTFR1	ENST00000458689.2	mitochondrial fission regulator 1	1051	1	0	0	1	0
FAM72C	ENST00000369175.3	family with sequence similarity 72, member C	9	1	0	0	1	0
ZSCAN20	ENST00000361328.3	zinc finger and SCAN domain containing 20	55	1	0	0	1	0
SLC22A23	ENST00000436008.2	solute carrier family 22, member 23	353	2	1	1	0	0
ACBD5	ENST00000396271.3	acyl-CoA binding domain containing 5	77	1	0	0	1	0
CXADR	ENST00000356275.6	coxsackie virus and adenovirus receptor	56	1	0	0	1	0
C6orf222	ENST00000437635.2	chromosome 6 open reading frame 222	5	1	1	0	0	0
LRP12	ENST00000424843.2	low density lipoprotein receptor-related protein 12	378	1	0	0	1	0
RAB27A	ENST00000396307.2	RAB27A, member RAS oncogene family	181	1	0	0	1	0
TMEM245	ENST00000374586.3	transmembrane protein 245	1320	1	0	0	1	0
BICD1	ENST00000548411.1	bicaudal D homolog 1 (Drosophila)	205	1	1	0	0	0
THBS1	ENST00000260356.5	thrombospondin 1	46844	2	2	0	0	0
CALB2	ENST00000349553.5	calbindin 2	5	1	0	1	0	0
CD177	ENST00000378009.4	CD177 molecule	5	1	0	1	0	0
PPP2R5D	ENST00000485511.1	protein phosphatase 2, regulatory subunit B', delta	1755	1	0	0	1	0
CYBRD1	ENST00000375252.3	cytochrome b reductase 1	4467	1	0	1	0	0
FRMD3	ENST00000304195.3	FERM domain containing 3	14	1	0	1	0	0
ZNF697	ENST00000421812.2	zinc finger protein 697	43	1	0	0	1	1
FAXC	ENST00000389677.5	failed axon connections homolog (Drosophila)	95	1	1	0	0	0
ETF1	ENST00000499810.2	eukaryotic translation termination factor 1	31	1	0	0	1	2
GCNT1	ENST00000376730.4	glucosaminyl (N-acetyl) transferase 1, core 2	93	1	1	0	0	1
FAM196B	ENST00000377365.3	family with sequence similarity 196, member B	174	1	0	1	0	0
FAM217B	ENST00000358293.3	family with sequence similarity 217, member B	175	1	0	0	1	1
TFCP2L1	ENST00000263707.5	transcription factor CP2-like 1	36	1	1	0	0	0
PIWIL2	ENST00000356766.6	piwi-like RNA-mediated gene silencing 2	5	1	0	1	0	0
MTMR11	ENST00000406732.3	myotubularin related protein 11	16	1	0	0	1	0
DAGLA	ENST00000257215.5	diacylglycerol lipase, alpha	1262	2	1	1	0	0
PTMS	ENST00000389462.4	parathymosin	3140	1	0	0	1	0
HOXB9	ENST00000311177.5	homeobox B9	8	1	0	1	0	0
FAM169A	ENST00000380515.3	family with sequence similarity 169, member A	90	1	0	0	1	0
KIT	ENST00000288135.5	v-kit Hardy-Zuckerman 4 feline sarcoma viral oncogene homolog	329	1	0	1	0	0
SLC9A8	ENST00000361573.2	solute carrier family 9, subfamily A (NHE8, cation proton antiporter 8), member 8	474	1	0	1	0	0
UNK	ENST00000293218.3	unkempt homolog (Drosophila)	124	1	0	1	0	0
TBC1D9B	ENST00000519746.1	TBC1 domain family, member 9B (with GRAM domain)	5042	1	0	1	0	1
PCDH19	ENST00000420881.2	protocadherin 19	7	1	0	0	1	1
SMYD1	ENST00000419482.2	SET and MYND domain containing 1	5	1	0	0	1	0
KPNA1	ENST00000344337.6	karyopherin alpha 1 (importin alpha 5)	1030	2	0	1	1	1
RPS6KC1	ENST00000366960.3	ribosomal protein S6 kinase, 52kDa, polypeptide 1	57	1	0	0	1	0
PRKCQ	ENST00000263125.5	protein kinase C, theta	7	1	0	0	1	0
OCLN	ENST00000355237.2	occludin	5	1	1	0	0	0
TAB3	ENST00000378933.1	TGF-beta activated kinase 1/MAP3K7 binding protein 3	201	1	0	0	1	0
PNPLA6	ENST00000221249.6	patatin-like phospholipase domain containing 6	429	1	0	1	0	0
DPH1	ENST00000263083.6	diphthamide biosynthesis 1	2807	1	0	0	1	0
CCDC176	ENST00000394009.3	coiled-coil domain containing 176	61	1	0	0	1	0
MLH3	ENST00000355774.2	mutL homolog 3	152	1	1	0	0	1
MKLN1	ENST00000352689.6	muskelin 1, intracellular mediator containing kelch motifs	477	2	1	0	1	1
RAB8B	ENST00000321437.4	RAB8B, member RAS oncogene family	45	1	0	0	1	1
APBA2	ENST00000558402.1	amyloid beta (A4) precursor protein-binding, family A, member 2	388	4	4	0	0	0
LEPROT	ENST00000371065.4	leptin receptor overlapping transcript	397	1	0	0	1	0
CLIC5	ENST00000339561.6	chloride intracellular channel 5	21	1	0	0	1	0
XYLT1	ENST00000261381.6	xylosyltransferase I	159	3	0	2	1	0
CACNG7	ENST00000391767.1	calcium channel, voltage-dependent, gamma subunit 7	5	1	0	1	0	0
CD99L2	ENST00000370377.3	CD99 molecule-like 2	303	1	0	0	1	0
ART4	ENST00000228936.4	ADP-ribosyltransferase 4	5	1	0	0	1	0
THEMIS	ENST00000368250.1	thymocyte selection associated	5	1	0	0	1	0
TMEM47	ENST00000275954.3	transmembrane protein 47	129	1	0	0	1	0
C2CD2	ENST00000329623.7	C2 calcium-dependent domain containing 2	106	1	0	0	1	1
CDC27	ENST00000066544.3	cell division cycle 27	438	2	1	1	0	0
ZBTB43	ENST00000449886.1	zinc finger and BTB domain containing 43	396	1	0	1	0	0
TIPRL	ENST00000367833.2	TIP41, TOR signaling pathway regulator-like (S. cerevisiae)	569	1	0	0	1	0
CSNK1A1	ENST00000261798.5	casein kinase 1, alpha 1	769	1	0	0	1	0
ARID3B	ENST00000346246.5	AT rich interactive domain 3B (BRIGHT-like)	11	2	0	1	1	0
RCAN2	ENST00000330430.6	regulator of calcineurin 2	32	1	0	0	1	0
POMGNT1	ENST00000396420.3	protein O-linked mannose N-acetylglucosaminyltransferase 1 (beta 1,2-)	2123	1	0	0	1	0
TMEM132C	ENST00000435159.2	transmembrane protein 132C	5	1	0	0	1	0
QSOX2	ENST00000358701.5	quiescin Q6 sulfhydryl oxidase 2	905	1	0	1	0	0
CALCR	ENST00000359558.2	calcitonin receptor	5	1	0	0	1	0
PDAP1	ENST00000350498.3	PDGFA associated protein 1	208	1	0	1	0	0
B3GALT1	ENST00000392690.3	UDP-Gal:betaGlcNAc beta 1,3-galactosyltransferase, polypeptide 1	35	2	0	2	0	0
TMEM56	ENST00000370203.4	transmembrane protein 56	113	2	0	1	1	0
ST6GALNAC3	ENST00000328299.3	ST6 (alpha-N-acetyl-neuraminyl-2,3-beta-galactosyl-1,3)-N-acetylgalactosaminide alpha-2,6-sialyltransferase 3	41	2	0	0	2	0
EDIL3	ENST00000296591.5	EGF-like repeats and discoidin I-like domains 3	2825	1	0	0	1	0
NUP37	ENST00000552283.1	nucleoporin 37kDa	458	1	0	1	0	0
PHF19	ENST00000373896.3	PHD finger protein 19	490	2	0	0	2	1
LRRC4	ENST00000249363.3	leucine rich repeat containing 4	26	1	0	0	1	0
LRCH1	ENST00000311191.6	leucine-rich repeats and calponin homology (CH) domain containing 1	381	2	1	1	0	0
CECR6	ENST00000399875.1	cat eye syndrome chromosome region, candidate 6	5	1	0	1	0	1
C15orf52	ENST00000397536.2	chromosome 15 open reading frame 52	14	1	0	0	1	0
CCL22	ENST00000219235.4	chemokine (C-C motif) ligand 22	5	1	0	1	0	0
ZNF800	ENST00000393313.1	zinc finger protein 800	239	1	0	0	1	0
CLDN2	ENST00000336803.1	claudin 2	19	1	1	0	0	0
AQP2	ENST00000199280.3	aquaporin 2 (collecting duct)	5	2	0	1	1	1
FAM161A	ENST00000404929.1	family with sequence similarity 161, member A	275	1	0	1	0	0
XDH	ENST00000379416.3	xanthine dehydrogenase	5	1	0	1	0	0
AMMECR1L	ENST00000272647.5	AMMECR1-like	21	1	0	1	0	0
LRIT3	ENST00000594814.1	leucine-rich repeat, immunoglobulin-like and transmembrane domains 3	5	1	0	0	1	0
RPRD2	ENST00000539519.1	regulation of nuclear pre-mRNA domain containing 2	280	1	0	0	1	0
COL13A1	ENST00000398974.3	collagen, type XIII, alpha 1	628	1	1	0	0	0
KRAS	ENST00000256078.4	Kirsten rat sarcoma viral oncogene homolog	40	1	1	0	0	1
LRWD1	ENST00000292616.5	leucine-rich repeats and WD repeat domain containing 1	67	1	0	1	0	0
ZNF394	ENST00000426306.2	zinc finger protein 394	77	2	2	0	0	1
PRMT2	ENST00000458387.2	protein arginine methyltransferase 2	584	1	0	0	1	0
GXYLT2	ENST00000389617.4	glucoside xylosyltransferase 2	207	5	0	2	3	0
BCL9L	ENST00000334801.3	B-cell CLL/lymphoma 9-like	91	1	1	0	0	0
SGSM1	ENST00000400358.4	small G protein signaling modulator 1	25	1	0	1	0	0
AMD1	ENST00000368885.3	adenosylmethionine decarboxylase 1	725	1	0	0	1	0
LMF2	ENST00000380796.3	lipase maturation factor 2	1375	1	0	1	0	0
PPCS	ENST00000372556.3	phosphopantothenoylcysteine synthetase	491	1	0	0	1	0
ZNF286B	ENST00000285274.5	zinc finger protein 286B	5	1	0	0	1	1
DUOX2	ENST00000389039.6	dual oxidase 2	5	2	0	2	0	0
KIAA0408	ENST00000483725.3	KIAA0408	95	3	3	0	0	0
C18orf25	ENST00000282059.6	chromosome 18 open reading frame 25	688	1	1	0	0	0
KLHDC8A	ENST00000367155.3	kelch domain containing 8A	8	1	0	1	0	0
C11orf44	ENST00000317019.2	chromosome 11 open reading frame 44	5	1	0	0	1	0
RAB3D	ENST00000222120.3	RAB3D, member RAS oncogene family	111	2	0	2	0	0
ZFYVE28	ENST00000508471.1	zinc finger, FYVE domain containing 28	18	1	1	0	0	1
PPM1L	ENST00000498165.1	protein phosphatase, Mg2+/Mn2+ dependent, 1L	59	2	0	2	0	0
ZBTB7C	ENST00000535628.2	zinc finger and BTB domain containing 7C	23	1	0	0	1	0
DOCK9	ENST00000376460.1	dedicator of cytokinesis 9	172	1	0	1	0	1
PCDH11Y	ENST00000215473.6	protocadherin 11 Y-linked	0	1	0	1	0	3
RWDD4	ENST00000326397.5	RWD domain containing 4	5	1	0	0	1	1
DPP10	ENST00000410059.1	dipeptidyl-peptidase 10 (non-functional)	5	1	0	1	0	0
COL4A6	ENST00000334504.7	collagen, type IV, alpha 6	37	1	0	1	0	0
PARM1	ENST00000513238.1	prostate androgen-regulated mucin-like protein 1	161	1	0	1	0	2
[truncated: 1,790 more rows]
